# Supplementary material for: Bromide ion promoted practical synthesis of phosphinothioates of sulfinic acid derivatives and H-phosphine oxides
Source: Royal Society of Chemistry journal article supplement (doi:10.1039/d2ra06351d), 2022-01-01
Supplement: d2ra06351d1.pdf [file d2ra06351d1.pdf]

## Supporting Information

### Bromide ion promoted practical synthesis of phosphinothioates of sulfinic acid derivatives with H-phosphine oxides

Haoyuan Li, Wenjie Yan, Peipei Ren, Huimin Hu, Runbo Sun,  
Meixia Liu, Zhengjiang Fu, Shengmei Guo and Hu Cai<sup>†</sup>

## CONTENTS

|                                                                                                             |    |
|-------------------------------------------------------------------------------------------------------------|----|
| 1. General information .....                                                                                | 2  |
| 2. General procedure.....                                                                                   | 2  |
| 1. General sulfinic acid synthesis from thiols or disulfides .....                                          | 2  |
| 2. General sulfinic acid synthesis from sodium arylsulfinate .....                                          | 2  |
| 3. General sulfinic acids synthesis from sodium arylsulfinate.....                                          | 2  |
| 4. General procedure for generation of 3a .....                                                             | 2  |
| 5. Screening the alkyl benzenesulfonates.....                                                               | 3  |
| 3. Characterization and analytical data of products.....                                                    | 3  |
| 4. Copies of product <sup>1</sup> H NMR, <sup>13</sup> C NMR, <sup>31</sup> P NMR, <sup>19</sup> F NMR..... | 3  |
| 5. Crystal data.....                                                                                        | 42 |

## 1. General information

The reagents used for experiments were commercially available and used as received unless otherwise noted.  $^1\text{H}$  NMR,  $^{13}\text{C}$  NMR,  $^{31}\text{P}$  NMR and  $^{19}\text{F}$  NMR were recorded in  $\text{CDCl}_3$  on a Bruker Avance III 400 spectrometer with TMS as internal standard (400 MHz  $^1\text{H}$ , 101 MHz  $^{13}\text{C}$ , 162 MHz  $^{31}\text{P}$  and 376 MHz  $^{19}\text{F}$ ) at room temperature. Column chromatography was performed on silica gel (300-400 mesh).

## 2. General procedure

### 1. General sulfinate synthesis from thiols or disulfides

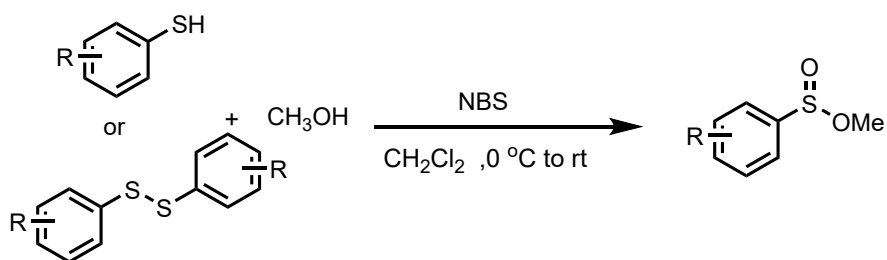

Solid N-bromosuccinimide powder (2.0 equiv.) was added in one portion to a 0 °C, methanol:dichloromethane solution (1:1 by volume) of the thiol (1equiv.). The cold bath was removed and, after 1 h, the mixture was poured into 0 °C, saturated  $\text{NaHCO}_3$  solution. The biphasic mixture was transferred to a separation funnel and shaken until discoloration. The phases were separated and the aqueous layer was extracted with dichloromethane (x3). The combined organic extract was washed with brine, dried ( $\text{Na}_2\text{SO}_4$ ), and concentrated to afford a yellowish crude sulfinate. The crude sulfinate was purified by flash chromatography on silica gel (200–300 mesh) to afford pure methyl sulfinate.

### 2. General sulfinate synthesis from sodium arylsulfinate

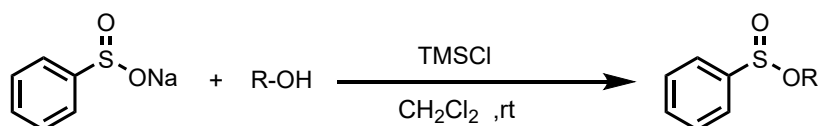

The mixture of an alcohol (10 mmol), a sodium arylsulfinate (5 mmol) and TMSCl (10 mmol) in  $\text{CH}_2\text{Cl}_2$  (20.0 mL) was stirred at 25 °C for 1 h, then water (10 mL) and dichloromethane (20 mL) were added. The two layers were separated, and the aqueous phase was extracted with dichloromethane (3×20 mL). The combined organic extracts were washed by brine, dried with anhydrous  $\text{Na}_2\text{SO}_4$ , filtered, and concentrated. The residue was purified by flash chromatography

on silica gel (200–300 mesh) to afford the desired sulfinate.

### 3. General sulfinic acids synthesis from sodium arylsulfinate

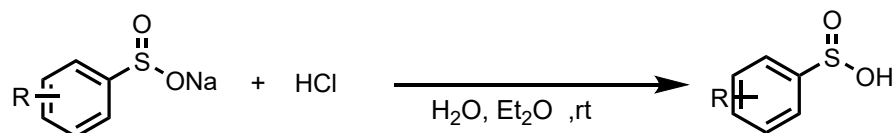

Add sodium arylsulfonates (10 mmol) dissolved in H<sub>2</sub>O (12.5 mL) and diethyl ether (12.5 mL) and HCl (37%, 0.9 mL) to a 100 mL round flask equipped with a stirring bar. Stir the reaction mixture during 1 h at room temperature. Extract the reaction mixture with diethyl ether (3x10 mL). Dry the organic layer over anhydrous Na<sub>2</sub>SO<sub>4</sub>. Filter the organic layer with diethyl ether. Remove the half of the diethyl ether to obtain thick residue under reducing pressure. Add petroleum ether (20 mL) to the mixture. Filter the mixture to afford arylsulfinic acids.

### 4. General procedure for generation of 3a

A round bottom flask equipped with a magnetic stir bar was charged with **1a** (0.2 mmol), **2a** (0.5 mmol, 2.5 equiv.), TBAB (0.4 mmol, 2.0 equiv.), then CH<sub>3</sub>CN (1.0 mL) was added into the mixture. Later, reaction system kept stirring at room temperature for 1 h. After that, the mixture was purified by column chromatography on silica gel to afford the corresponding product.

**Gram-scale synthesis:** The mixture of **1a** (4.0 mmol), **2a** (10 mmol) and TBAB (8 mmol) in CH<sub>3</sub>CN (10 mL) was stirred at room temperature for 4 h. After that, the mixture was purified by column chromatography on silica gel to afford the corresponding product **3a** (1.14g, 92%).

### 5. Screening the alkyl benzenesulfonates

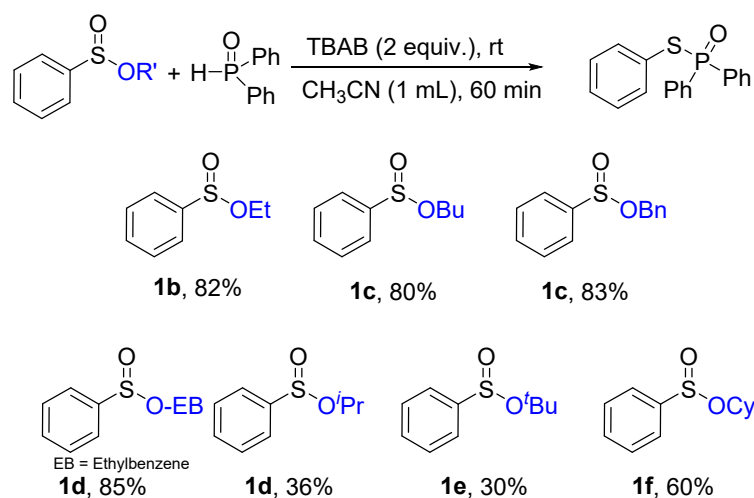

### 3. Characterization and analytical data of products

#### S-phenyl diphenylphosphinothioate (3a)

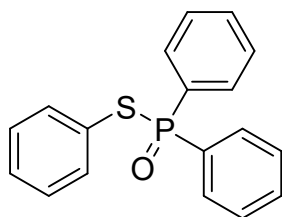

The title compound was prepared according to the general procedure and purified by column chromatography on silica gel and eluted with petroleum ether/ethyl acetate (1/1) to afford a white solid in 94% yield.  $^1\text{H}$  NMR (400 MHz,  $\text{CDCl}_3$ )  $\delta$  7.88-7.81 (m, 4H), 7.53 – 7.40 (m, 8H), 7.27 – 7.16 (m, 3H);  $^{13}\text{C}$  NMR (101 MHz,  $\text{CDCl}_3$ )  $\delta$  135.4 (d,  $J = 3.7$  Hz), 133.1 (d,  $J = 108.1$  Hz), 132.4 (d,  $J = 3.0$  Hz), 131.6 (d,  $J = 10.2$  Hz), 129.1 (d,  $J = 1.4$  Hz), 129.0 (d,  $J = 2.1$  Hz), 128.6 (d,  $J = 13.1$  Hz), 126.1 (d,  $J = 5.1$  Hz);  $^{31}\text{P}$  NMR (162 MHz,  $\text{CDCl}_3$ )  $\delta$  41.53.

#### S-(4-isopropylphenyl) diphenylphosphinothioate (3b)

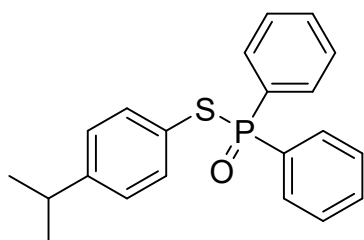

The title compound was prepared according to the general procedure and purified by column chromatography on silica gel and eluted with petroleum ether/ethyl acetate (1/1) to afford a white solid in 87% yield.  $^1\text{H}$  NMR (400 MHz,  $\text{CDCl}_3$ )  $\delta$  7.83 (dd,  $J = 12.0, 8.0$  Hz, 4H), 7.49 (t,  $J = 8.0$  Hz, 2H), 7.42 (dt,  $J = 12.0, 4.0$  Hz, 4H), 7.33 (d,  $J = 8.0$  Hz, 2H), 7.04 (d,  $J = 8.0$  Hz, 2H), 2.83–2.73 (m, 1H), 1.15 (d,  $J = 8.0$  Hz, 6H);  $^{13}\text{C}$  NMR (101 MHz,  $\text{CDCl}_3$ )  $\delta$  150.0 (d,  $J = 2.5$  Hz), 135.5 (d,  $J = 3.7$  Hz), 132.7 (d,  $J = 107.1$  Hz), 132.3 (d,  $J = 3.0$  Hz), 131.6 (d,  $J = 10.1$  Hz), 128.5 (d,  $J = 13.1$  Hz), 127.4 (d,  $J = 2.0$  Hz), 122.5 (d,  $J = 5.3$  Hz), 33.8, 23.8;  $^{31}\text{P}$  NMR (162 MHz,  $\text{CDCl}_3$ )  $\delta$  41.61.

#### S-(*p*-tolyl) diphenylphosphinothioate (3c)

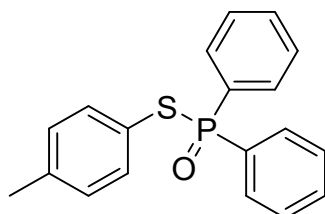

The title compound was prepared according to the general procedure and purified by column chromatography on silica gel and eluted with petroleum ether/ethyl acetate (1/1) to afford a white

solid in 84% yield.  $^1\text{H}$  NMR (400 MHz,  $\text{CDCl}_3$ )  $\delta$  7.88 – 7.74 (m, 4H), 7.53 – 7.46 (m, 2H), 7.46 – 7.37 (m, 4H), 7.33 – 7.27 (m, 2H), 6.99 (d,  $J = 8.0\text{ Hz}$ , 2H), 2.24 (s, 3H);  $^{13}\text{C}$  NMR (101 MHz,  $\text{CDCl}_3$ )  $\delta$  139.2 (d,  $J = 3.0\text{ Hz}$ ), 135.4 (d,  $J = 4.0\text{ Hz}$ ), 132.7 (d,  $J = 107.1\text{ Hz}$ ), 132.3 (d,  $J = 4.0\text{ Hz}$ ), 131.7 (d,  $J = 10.1\text{ Hz}$ ), 130.0 (d,  $J = 2.0\text{ Hz}$ ), 128.5 (d,  $J = 13.1\text{ Hz}$ ), 122.3 (d,  $J = 5.1\text{ Hz}$ ), 21.2;  $^{31}\text{P}$  NMR (162 MHz,  $\text{CDCl}_3$ )  $\delta$  41.33.

### S-(4-(tert-butyl)phenyl) diphenylphosphinothioate (3d)

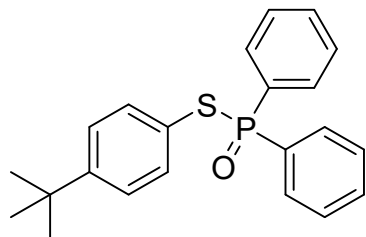

The title compound was prepared according to the general procedure and purified by column chromatography on silica gel and eluted with petroleum ether/ethyl acetate (1/1) to afford a white solid in 80% yield.  $^1\text{H}$  NMR (400 MHz,  $\text{CDCl}_3$ )  $\delta$  7.87-7.80 (m, 4H), 7.52 – 7.46 (m, 2H), 7.45-7.39 (m, 4H), 7.34 (d,  $J = 8.0\text{ Hz}$ , 2H), 7.20 (d,  $J = 8.0\text{ Hz}$ , 2H), 1.22 (s, 9H);  $^{13}\text{C}$  NMR (101 MHz,  $\text{CDCl}_3$ )  $\delta$  152.3 (d,  $J = 2.0\text{ Hz}$ ), 135.2 (d,  $J = 4.0\text{ Hz}$ ), 132.7 (d,  $J = 107.1\text{ Hz}$ ), 132.3 (d,  $J = 3.0\text{ Hz}$ ), 131.7 (d,  $J = 10.1\text{ Hz}$ ), 128.5 (d,  $J = 13.1\text{ Hz}$ ), 126.3 (d,  $J = 2.0\text{ Hz}$ ), 122.3 (d,  $J = 5.1\text{ Hz}$ ), 34.6, 31.2;  $^{31}\text{P}$  NMR (162 MHz,  $\text{CDCl}_3$ )  $\delta$  41.59.

### S-(4-fluorophenyl) diphenylphosphinothioate (3e)

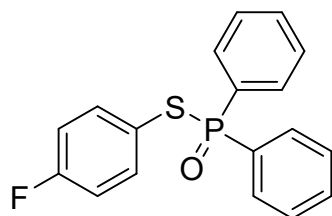

The title compound was prepared according to the general procedure and purified by column chromatography on silica gel and eluted with petroleum ether/ethyl acetate (1/1) to afford a white solid in 85% yield.  $^1\text{H}$  NMR (400 MHz,  $\text{CDCl}_3$ )  $\delta$  7.89 – 7.81 (m, 4H), 7.55 – 7.50 (m, 2H), 7.48 – 7.42 (m, 4H), 7.29 – 7.25 (m, 1H), 7.20 – 7.14 (m, 2H), 6.98 – 6.91 (m, 1H);  $^{13}\text{C}$  NMR (101 MHz,  $\text{CDCl}_3$ )  $\delta$  162.3 (dd,  $J = 250.5, 2.0\text{ Hz}$ ), 132.6 (d,  $J = 4.0\text{ Hz}$ ), 132.2 (d,  $J = 108.1\text{ Hz}$ ), 131.6 (d,  $J = 10.1\text{ Hz}$ ), 131.0 (t,  $J = 3.0\text{ Hz}$ ), 130.3 (dd,  $J = 8.1, 2.0\text{ Hz}$ ), 128.7 (d,  $J = 13.1\text{ Hz}$ ), 128.3 (dd,  $J = 8.1, 5.1\text{ Hz}$ ), 122.1 (dd,  $J = 23.2, 4.0\text{ Hz}$ ), 116.2 (dd,  $J = 21.2, 2.0\text{ Hz}$ );  $^{31}\text{P}$  NMR (162 MHz,  $\text{CDCl}_3$ )  $\delta$  41.59;  $^{19}\text{F}$  NMR (376 MHz,  $\text{CDCl}_3$ )  $\delta$  -111.36.

### S-(4-chlorophenyl) diphenylphosphinothioate (3f)

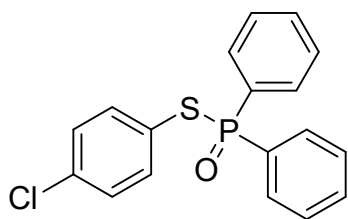

The title compound was prepared according to the general procedure and purified by column chromatography on silica gel and eluted with petroleum ether/ethyl acetate (1/1) to afford a white solid in 83% yield.  $^1\text{H}$  NMR (400 MHz,  $\text{CDCl}_3$ )  $\delta$  7.86-7.78 (m, 4H), 7.54 – 7.48 (m, 2H), 7.43 (m, 4H), 7.36 (d,  $J$  = 8.0 Hz, 2H), 7.15 (d,  $J$  = 8.0 Hz, 2H);  $^{13}\text{C}$  NMR (101 MHz,  $\text{CDCl}_3$ )  $\delta$  136.6 (d,  $J$  = 3.0 Hz), 135.6 (d,  $J$  = 3.0 Hz), 132.7, 132.5 (d,  $J$  = 3.0 Hz), 131.6 (d,  $J$  = 10.1 Hz), 129.4 (d,  $J$  = 2.0 Hz), 128.7 (d,  $J$  = 13.1 Hz), 124.7 (d,  $J$  = 4.0 Hz);  $^{31}\text{P}$  NMR (162 MHz,  $\text{CDCl}_3$ )  $\delta$  41.60.

### S-(4-bromophenyl) diphenylphosphinothioate (3g)

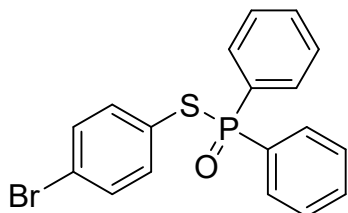

The title compound was prepared according to the general procedure and purified by column chromatography on silica gel and eluted with petroleum ether/ethyl acetate (1/1) to afford a colorless oil in 83% yield.  $^1\text{H}$  NMR (400 MHz,  $\text{CDCl}_3$ )  $\delta$  7.89 – 7.79 (m, 4H), 7.56 – 7.50 (m, 2H), 7.49 – 7.41 (m, 4H), 7.35 – 7.28 (m, 4H);  $^{13}\text{C}$  NMR (101 MHz,  $\text{CDCl}_3$ )  $\delta$  136.8 (d,  $J$  = 4.0 Hz), 132.7, 132.5 (d,  $J$  = 3.0 Hz), 132.3 (d,  $J$  = 1.0 Hz), 131.6 (d,  $J$  = 10.1 Hz), 128.7 (d,  $J$  = 13.1 Hz), 125.4 (d,  $J$  = 5.1 Hz), 123.8 (d,  $J$  = 2.0 Hz);  $^{31}\text{P}$  NMR (162 MHz,  $\text{CDCl}_3$ )  $\delta$  41.43.

### S-(4-methoxyphenyl) diphenylphosphinothioate (3h)

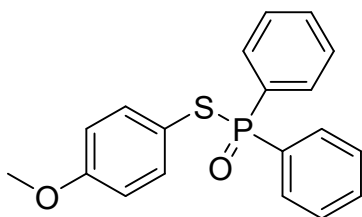

The title compound was prepared according to the general procedure and purified by column chromatography on silica gel and eluted with petroleum ether/ethyl acetate (1/1) to afford a white solid in 81% yield.  $^1\text{H}$  NMR (400 MHz,  $\text{CDCl}_3$ )  $\delta$  7.88 – 7.79 (m, 4H), 7.55 – 7.48 (m, 2H), 7.47 – 7.39 (m, 4H), 7.36 – 7.30 (m, 2H), 6.73 (d,  $J$  = 8.0 Hz, 2H), 3.73 (s, 3H);  $^{13}\text{C}$  NMR (101 MHz,  $\text{CDCl}_3$ )  $\delta$  160.5 (d,  $J$  = 2.0 Hz), 137.1 (d,  $J$  = 4.0 Hz), 132.6 (d,  $J$  = 106.1 Hz), 132.3 (d,  $J$  = 3.0 Hz), 131.7 (d,  $J$  = 10.1 Hz), 128.5 (d,  $J$  = 13.1 Hz), 116.0 (d,  $J$  = 5.1 Hz), 114.8 (d,  $J$  = 2.0 Hz), 55.3;  $^{31}\text{P}$  NMR (162 MHz,  $\text{CDCl}_3$ )  $\delta$  41.35.

### S-(4-(trifluoromethyl)phenyl) diphenylphosphinothioate (3i)

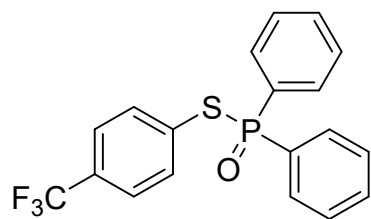

The title compound was prepared according to the general procedure and purified by column chromatography on silica gel and eluted with petroleum ether/ethyl acetate (1/1) to afford a white solid in 80% yield.  $^1\text{H}$  NMR (400 MHz,  $\text{CDCl}_3$ )  $\delta$  7.90 – 7.81 (m, 4H), 7.60 (d,  $J$  = 8.0 Hz, 2H), 7.56 – 7.50 (m, 2H), 7.50 – 7.42 (m, 6H);  $^{13}\text{C}$  NMR (101 MHz,  $\text{CDCl}_3$ )  $\delta$  135.2 (d,  $J$  = 4.0 Hz), 132.7 (d,  $J$  = 3.0 Hz), 132.0 (d,  $J$  = 107.6 Hz), 131.6 (d,  $J$  = 10.1 Hz), 130.9 (dd,  $J$  = 32.3, 2.0 Hz), 128.74 (d,  $J$  = 13.1 Hz), 125.9 (q,  $J$  = 2.0 Hz), 125.1, 122.4;  $^{31}\text{P}$  NMR (162 MHz,  $\text{CDCl}_3$ )  $\delta$  41.73;  $^{19}\text{F}$  NMR (376 MHz,  $\text{CDCl}_3$ )  $\delta$  -62.88.

### S-(4-nitrophenyl) diphenylphosphinothioate (3j)

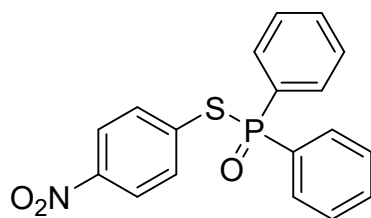

The title compound was prepared according to the general procedure and purified by column chromatography on silica gel and eluted with petroleum ether/ethyl acetate (1/1) to afford a white solid in 45% yield.  $^1\text{H}$  NMR (400 MHz,  $\text{CDCl}_3$ )  $\delta$  8.05 (d,  $J$  = 8.0 Hz, 2H), 7.90 – 7.82 (m, 4H), 7.70 – 7.66 (m, 2H), 7.59 – 7.53 (m, 2H), 7.52 – 7.45 (m, 4H);  $^{13}\text{C}$  NMR (101 MHz,  $\text{CDCl}_3$ )  $\delta$  147.9, 136.1 (d,  $J$  = 5.1 Hz), 135.2 (d,  $J$  = 4.0 Hz), 132.9 (d,  $J$  = 3.0 Hz), 131.7 (d,  $J$  = 108.1 Hz), 131.6 (d,  $J$  = 10.1 Hz), 128.87 (d,  $J$  = 13.1 Hz), 123.9;  $^{31}\text{P}$  NMR (162 MHz,  $\text{CDCl}_3$ )  $\delta$  41.96.

### S-(3-fluorophenyl) diphenylphosphinothioate (3k)

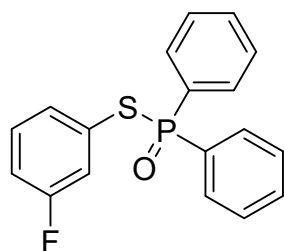

The title compound was prepared according to the general procedure and purified by column chromatography on silica gel and eluted with petroleum ether/ethyl acetate (1/1) to afford a white solid in 87% yield.  $^1\text{H}$  NMR (400 MHz,  $\text{CDCl}_3$ )  $\delta$  7.89 – 7.81 (m, 4H), 7.55 – 7.50 (m, 2H), 7.48 – 7.42 (m, 4H), 7.29 – 7.25 (m, 1H), 7.20 – 7.14 (m, 2H), 6.98 – 6.91 (m, 1H);  $^{13}\text{C}$  NMR (101 MHz,  $\text{CDCl}_3$ )  $\delta$  162.3 (dd,  $J$  = 250.5, 2.0 Hz), 132.6 (d,  $J$  = 4.0 Hz), 132.2 (d,  $J$  = 108.1 Hz), 131.6 (d,  $J$  = 10.1 Hz), 131.0 (t,  $J$  = 3.0 Hz), 130.3 (dd,  $J$  = 8.1, 2.0 Hz), 128.7 (d,  $J$  = 13.1 Hz), 128.3 (dd,  $J$  = 8.1, 5.1 Hz), 122.1 (dd,  $J$  = 23.2, 4.0 Hz), 116.2 (dd,  $J$  = 21.2, 2.0 Hz);  $^{31}\text{P}$  NMR (162 MHz,  $\text{CDCl}_3$ )  $\delta$  41.59;  $^{19}\text{F}$  NMR (376 MHz,  $\text{CDCl}_3$ )  $\delta$  -111.36.

### S-(2-fluorophenyl) diphenylphosphinothioate (3l)

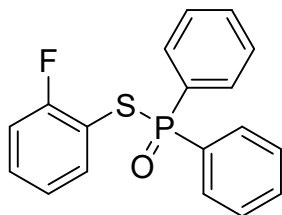

The title compound was prepared according to the general procedure and purified by column chromatography on silica gel and eluted with petroleum ether/ethyl acetate (1/1) to afford a white solid in 84% yield. <sup>1</sup>H NMR (400 MHz, CDCl<sub>3</sub>) δ 7.91 – 7.80 (m, 4H), 7.69 (t, *J* = 8.0 Hz, 1H), 7.55 – 7.48 (m, 2H), 7.46 – 7.42 (m, 4H), 7.25 – 7.20 (m, 1H), 7.04 (t, *J* = 8.0 Hz, 1H), 6.93 (t, *J* = 8.0 Hz, 1H); <sup>13</sup>C NMR (101 MHz, CDCl<sub>3</sub>) δ 162.6 (dd, *J* = 249.5, 4.0 Hz), 137.9 (d, *J* = 3.0 Hz), 132.5 (d, *J* = 3.0 Hz), 132.3 (d, *J* = 108.1 Hz), 131.6 (d, *J* = 11.1 Hz), 131.3 (dd, *J* = 8.1, 2.0 Hz), 128.6 (d, *J* = 13.1 Hz), 124.7 (dd, *J* = 4.0, 2.0 Hz), 116.0 (dd, *J* = 23.2, 2.0 Hz), 113.5 (dd, *J* = 18.2, 5.1 Hz); <sup>31</sup>P NMR (162 MHz, CDCl<sub>3</sub>) δ 42.00; <sup>19</sup>F NMR (376 MHz, CDCl<sub>3</sub>) δ -106.32.

### S-(*m*-tolyl) diphenylphosphinothioate (3m)

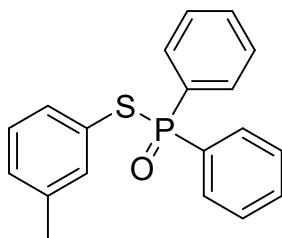

The title compound was prepared according to the general procedure and purified by column chromatography on silica gel and eluted with petroleum ether/ethyl acetate (1/1) to afford a white solid in 85% yield. <sup>1</sup>H NMR (400 MHz, CDCl<sub>3</sub>) δ 7.89 – 7.81 (m, 4H), 7.53 – 7.48 (m, 2H), 7.47 – 7.41 (m, 4H), 7.25 – 7.21 (m, 2H), 7.11 – 7.02 (m, 2H), 2.21 (s, 3H); <sup>13</sup>C NMR (101 MHz, CDCl<sub>3</sub>) δ 139.0 (d, *J* = 2.0 Hz), 136.1 (d, *J* = 4.0 Hz), 132.7 (d, *J* = 107.1 Hz), 132.4 (d, *J* = 4.0 Hz), 132.3 (d, *J* = 3.0 Hz), 131.7 (d, *J* = 10.1 Hz), 129.8 (d, *J* = 2.0 Hz), 128.9 (d, *J* = 1.0 Hz), 128.5 (d, *J* = 13.1 Hz), 125.7 (d, *J* = 5.1 Hz), 21.2; <sup>31</sup>P NMR (162 MHz, CDCl<sub>3</sub>) δ 41.34.

### S-(*o*-tolyl) diphenylphosphinothioate (3n)



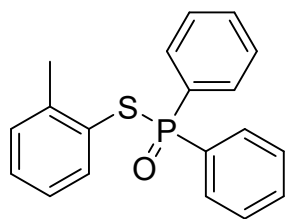

The title compound was prepared according to the general procedure and purified by column chromatography on silica gel and eluted with petroleum ether/ethyl acetate (2/1) to afford a white solid in 82% yield.  $^1\text{H}$  NMR (400 MHz,  $\text{CDCl}_3$ )  $\delta$  7.85 – 7.79 (m, 4H), 7.54 – 7.48 (m, 2H), 7.47 – 7.39 (m, 5H), 7.19 – 7.10 (m, 2H), 7.03 – 6.99 (m, 1H), 2.34 (s, 3H);  $^{13}\text{C}$  NMR (101 MHz,  $\text{CDCl}_3$ )  $\delta$  142.9 (d,  $J = 3.0$  Hz), 136.8 (d,  $J = 4.0$  Hz), 133.3, 132.3 (d,  $J = 4.0$  Hz), 131.5 (d,  $J = 10.1$  Hz), 130.7 (d,  $J = 1.0$  Hz), 129.3 (d,  $J = 2.0$  Hz), 128.5 (d,  $J = 13.1$  Hz), 126.5 (d,  $J = 2.0$  Hz), 125.4 (d,  $J = 5.1$  Hz), 21.4;  $^{31}\text{P}$  NMR (162 MHz,  $\text{CDCl}_3$ )  $\delta$  41.06.

### S-(2-methoxyphenyl) diphenylphosphinothioate (3o)

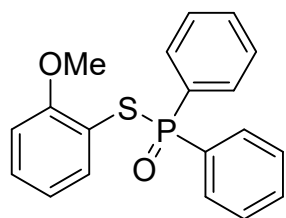

The title compound was prepared according to the general procedure and purified by column chromatography on silica gel and eluted with petroleum ether/ethyl acetate (1/10) to afford a white solid in 54% yield.  $^1\text{H}$  NMR (400 MHz,  $\text{CDCl}_3$ )  $\delta$  7.92 – 7.83 (m, 4H), 7.75 – 7.70 (m, 1H), 7.59 – 7.40 (m, 7H), 7.36 – 7.30 (m, 1H), 6.59 (d,  $J = 8.0$  Hz, 1H), 3.61 (s, 3H);  $^{13}\text{C}$  NMR (101 MHz,  $\text{CDCl}_3$ )  $\delta$  158.8 (d,  $J = 4.0$  Hz), 139.5 (d,  $J = 4.0$  Hz), 133.4 (d,  $J = 2.0$  Hz), 132.8 (d,  $J = 107.1$  Hz), 132.4 (d,  $J = 3.0$  Hz), 131.7 (d,  $J = 11.1$  Hz), 128.4 (d,  $J = 13.1$  Hz), 116.4 (d,  $J = 4.0$  Hz), 112.7 (d,  $J = 2.0$  Hz), 112.55 (d,  $J = 2.0$  Hz), 55.83.  $^{31}\text{P}$  NMR (162 MHz,  $\text{CDCl}_3$ )  $\delta$  41.43.

### S-(naphthalen-2-yl) diphenylphosphinothioate (3p)

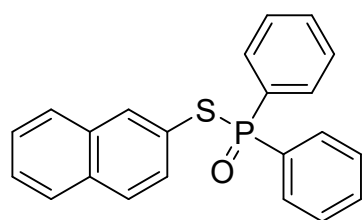

The title compound was prepared according to the general procedure and purified by column chromatography on silica gel and eluted with petroleum ether/ethyl acetate (1/1) to afford a light yellow solid in 85% yield.  $^1\text{H}$  NMR (400 MHz,  $\text{CDCl}_3$ )  $\delta$  7.99 (s, 1H), 7.92 – 7.82 (m, 4H), 7.75 – 7.67 (m, 2H), 7.65 (d,  $J = 12.0$  Hz, 1H), 7.51 – 7.39 (m, 9H);  $^{13}\text{C}$  NMR (101 MHz,  $\text{CDCl}_3$ )  $\delta$  135.4 (d,  $J = 4.0$  Hz), 133.5 (d,  $J = 2.0$  Hz), 133.0 (d,  $J = 2.0$  Hz), 132.6 (d,  $J = 107.8$  Hz), 132.4 (d,  $J = 3.0$  Hz), 131.7 (d,  $J = 10.1$  Hz), 131.6 (d,  $J = 4.0$  Hz), 128.7 (d,  $J = 1.0$  Hz), 128.6 (d,  $J = 13.1$  Hz), 127.8, 127.6, 126.9, 126.5, 123.5 (d,  $J = 6.1$  Hz);  $^{31}\text{P}$  NMR (162 MHz,  $\text{CDCl}_3$ )  $\delta$  41.51.

### S-phenyl di-p-tolylphosphinothioate (3r)

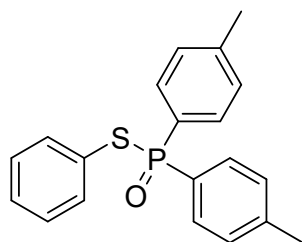

The title compound was prepared according to the general procedure and purified by column chromatography on silica gel and eluted with petroleum ether/ethyl acetate (2/1) to afford a white solid in 88% yield.  $^1\text{H}$  NMR (400 MHz,  $\text{CDCl}_3$ )  $\delta$  7.72 (dd,  $J = 12.0, 8.0$  Hz, 4H), 7.45 (d,  $J = 8.0$  Hz, 2H), 7.20 (dd,  $J = 20.0, 8.0$  Hz, 7H), 2.37 (s, 6H);  $^{13}\text{C}$  NMR (101 MHz,  $\text{CDCl}_3$ )  $\delta$  142.8 (d,  $J = 3.0$  Hz), 135.2 (d,  $J = 4.0$  Hz), 131.6 (d,  $J = 10.1$  Hz), 130.0 (d,  $J = 1.0$  Hz), 129.2 (d,  $J = 13.1$  Hz), 129.0 (d,  $J = 1.0$  Hz), 128.7 (d,  $J = 2.0$  Hz), 126.6 (d,  $J = 5.1$  Hz), 21.6 (d,  $J = 1.0$  Hz);  $^{31}\text{P}$  NMR (162 MHz,  $\text{CDCl}_3$ )  $\delta$  42.05.

### S-phenyl bis(4-methoxyphenyl)phosphinothioate (3s)

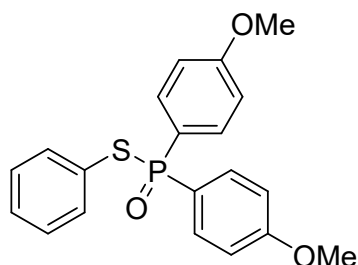

The title compound was prepared according to the general procedure and purified by column chromatography on silica gel and eluted with petroleum ether/ethyl acetate (1/1) to afford a white solid in 90% yield.  $^1\text{H}$  NMR (400 MHz,  $\text{CDCl}_3$ )  $\delta$  7.72 (dd,  $J = 12.0, 8.0$  Hz, 4H), 7.45 (d,  $J = 8.0$  Hz, 2H), 7.20 (dd,  $J = 20.0, 8.0$  Hz, 7H), 2.37 (s, 3H);  $^{13}\text{C}$  NMR (101 MHz,  $\text{CDCl}_3$ )  $\delta$  142.8 (d,  $J = 3.0$  Hz), 135.2 (d,  $J = 4.0$  Hz), 131.6 (d,  $J = 10.1$  Hz), 130.0 (d,  $J = 1.0$  Hz), 129.2 (d,  $J = 13.1$  Hz), 129.0 (d,  $J = 1.0$  Hz), 128.7 (d,  $J = 2.0$  Hz), 126.6 (d,  $J = 5.1$  Hz), 21.6 (d,  $J = 1.0$  Hz);  $^{31}\text{P}$  NMR (162 MHz,  $\text{CDCl}_3$ )  $\delta$  42.05.

### S-phenyl bis(3,5-dimethylphenyl)phosphinothioate (3t)

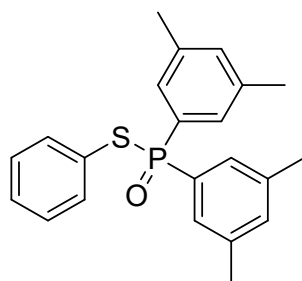

The title compound was prepared according to the general procedure and purified by column chromatography on silica gel and eluted with petroleum ether/ethyl acetate (2/1) to afford a white solid in 92% yield.  $^1\text{H}$  NMR (400 MHz,  $\text{CDCl}_3$ )  $\delta$  7.44 (d,  $J = 13.3$  Hz, 6H), 7.21 (m, 3H), 7.12 (s, 2H), 2.32 (s, 12H);  $^{13}\text{C}$  NMR (101 MHz,  $\text{CDCl}_3$ )  $\delta$  138.2 (d,  $J = 14.1$  Hz), 135.3 (d,  $J = 3.0$  Hz), 134.0 (d,  $J = 3.0$  Hz).

Hz), 132.3 (d,  $J = 106.1$  Hz), 129.1 (d,  $J = 10.1$  Hz), 129.0 (d,  $J = 1.0$  Hz), 128.8 (d,  $J = 2.0$  Hz), 126.6 (d,  $J = 5.1$  Hz), 21.3;  $^{31}\text{P}$  NMR (162 MHz,  $\text{CDCl}_3$ )  $\delta$  42.69.

### S-phenyl di(naphthalen-2-yl)phosphinothioate (3u)

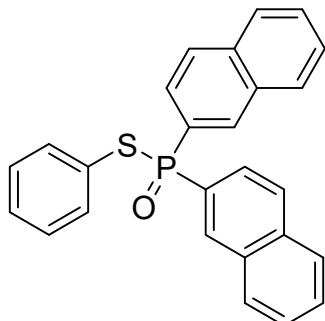

The title compound was prepared according to the general procedure and purified by column chromatography on silica gel and eluted with petroleum ether/ethyl acetate (1/10) to afford a white solid in 94% yield.  $^1\text{H}$  NMR (400 MHz,  $\text{CDCl}_3$ )  $\delta$  8.46 (d,  $J = 16.0$  Hz, 2H), 7.92–7.83 (m, 8H), 7.61–7.48 (m, 6H), 7.22–7.12 (m, 3H);  $^{13}\text{C}$  NMR (101 MHz,  $\text{CDCl}_3$ )  $\delta$  135.4 (d,  $J = 4.0$  Hz), 134.8 (d,  $J = 2.0$  Hz), 134.0 (d,  $J = 9.1$  Hz), 132.4 (d,  $J = 14.1$  Hz), 130.1, 129.2 (d,  $J = 1.0$  Hz), 129.1, 129.0 (d,  $J = 2.0$  Hz), 128.5, 128.5, 128.4, 127.8, 127.0, 126.2 (d,  $J = 12.1$  Hz);  $^{31}\text{P}$  NMR (162 MHz,  $\text{CDCl}_3$ )  $\delta$  41.61.

### methyl 4-((diphenylphosphoryl)thio)benzoate (3w)

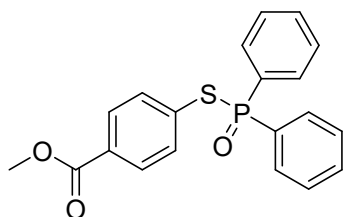

The title compound was prepared according to the general procedure and purified by column chromatography on silica gel and eluted with petroleum ether/ethyl acetate (1/1) to afford a white solid in 50% yield.  $^1\text{H}$  NMR (400 MHz,  $\text{CDCl}_3$ )  $\delta$  7.88 – 7.79 (m, 6H), 7.56 – 7.48 (m, 4H), 7.47 – 7.40 (m, 4H), 3.85 (s, 3H).  $^{13}\text{C}$  NMR (101 MHz,  $\text{CDCl}_3$ )  $\delta$  166.4, 134.7 (d,  $J = 4.0$  Hz), 132.6 (d,  $J = 4.0$  Hz), 131.6 (d,  $J = 11.1$  Hz), 130.0 (d,  $J = 2.0$  Hz), 128.7 (d,  $J = 14.1$  Hz), 52.2.  $^{31}\text{P}$  NMR (162 MHz,  $\text{CDCl}_3$ )  $\delta$  41.77. HRMS (ESI-TOF)  $m/z$ :  $[\text{M}+\text{H}]^+$  calcd for  $\text{C}_{20}\text{H}_{17}\text{O}_3\text{PS}^+$ :369.0709; Found: 369.0709

## 4. Copies of product $^1\text{H}$ NMR, $^{13}\text{C}$ NMR, $^{31}\text{P}$ NMR, $^{19}\text{F}$ NMR

### S-phenyl diphenylphosphinothioate (3a)

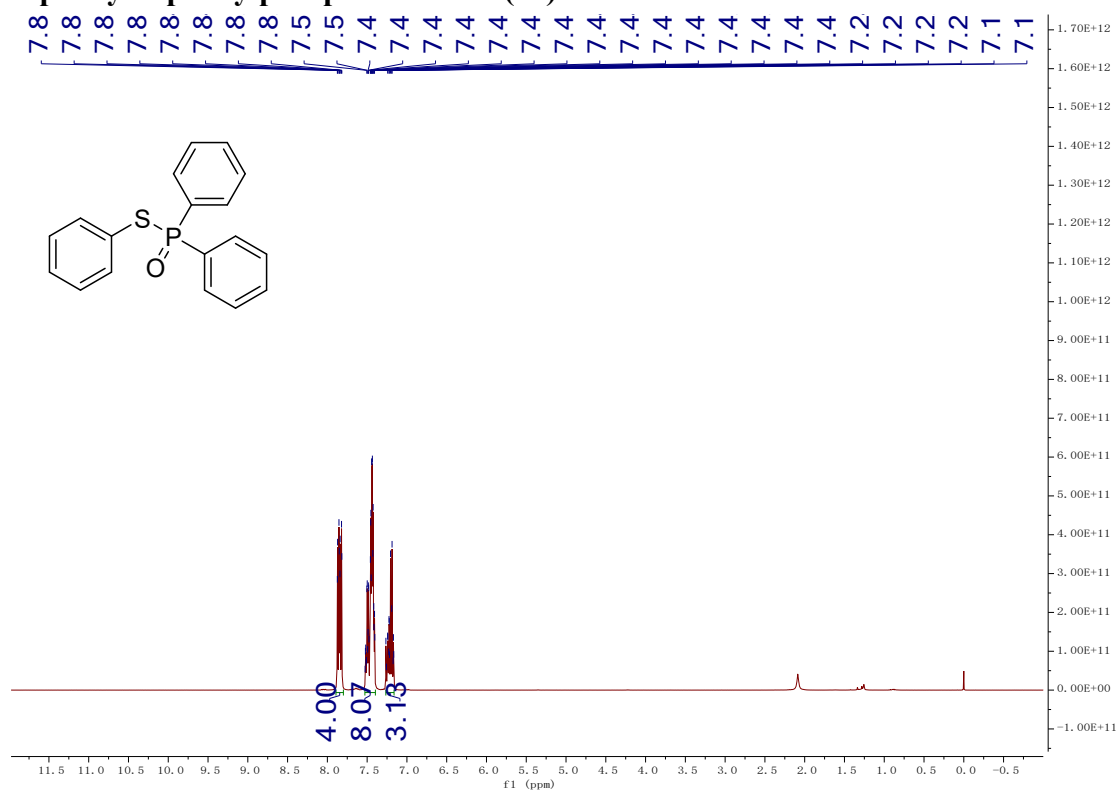

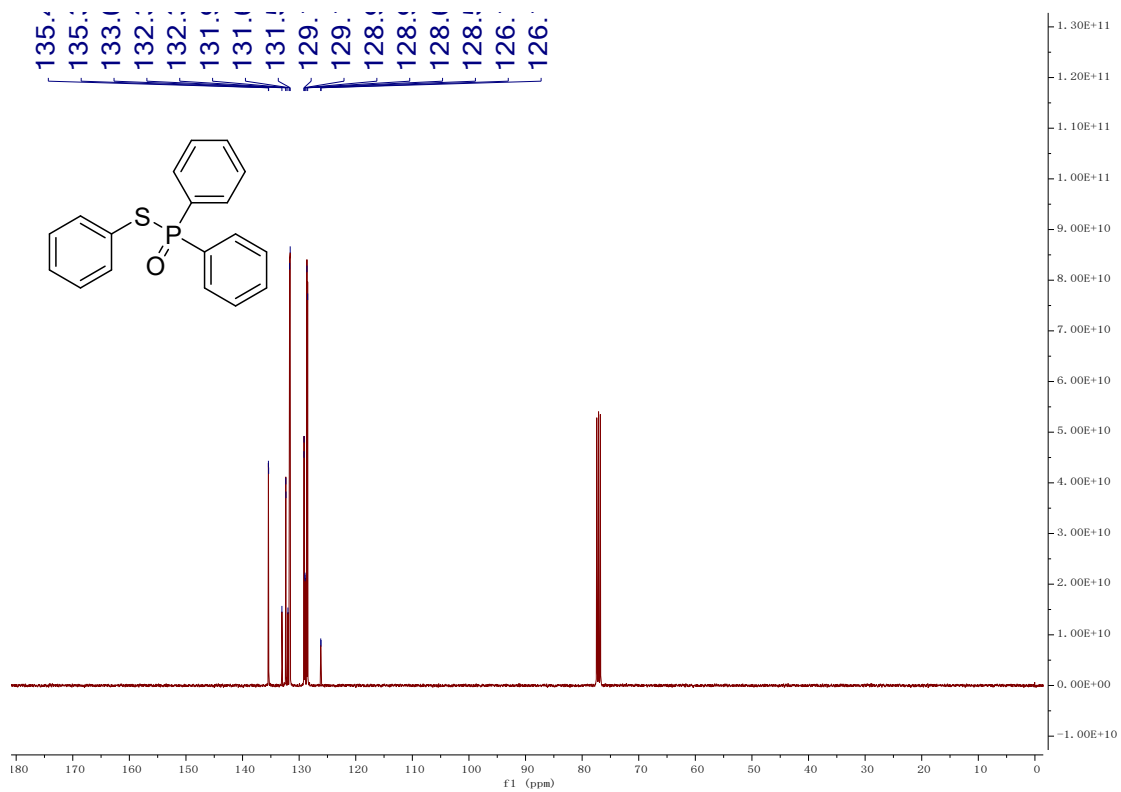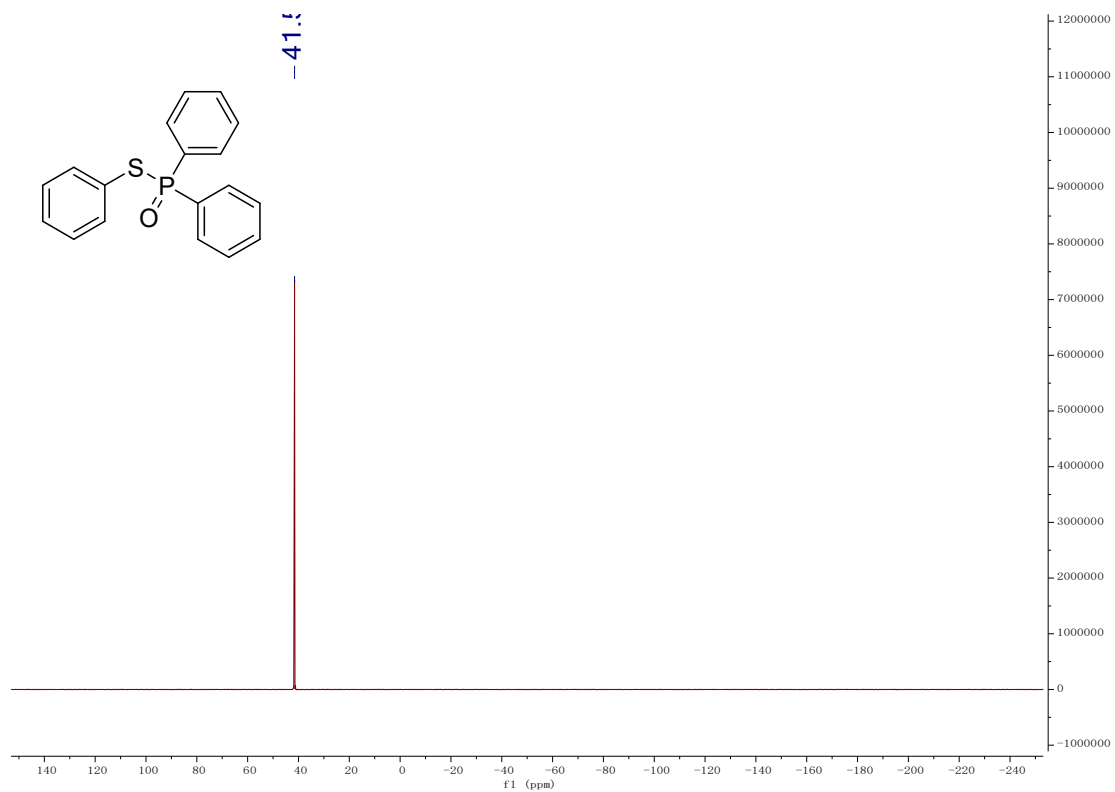

**S-(4-isopropylphenyl) diphenylphosphinothioate (3b)**

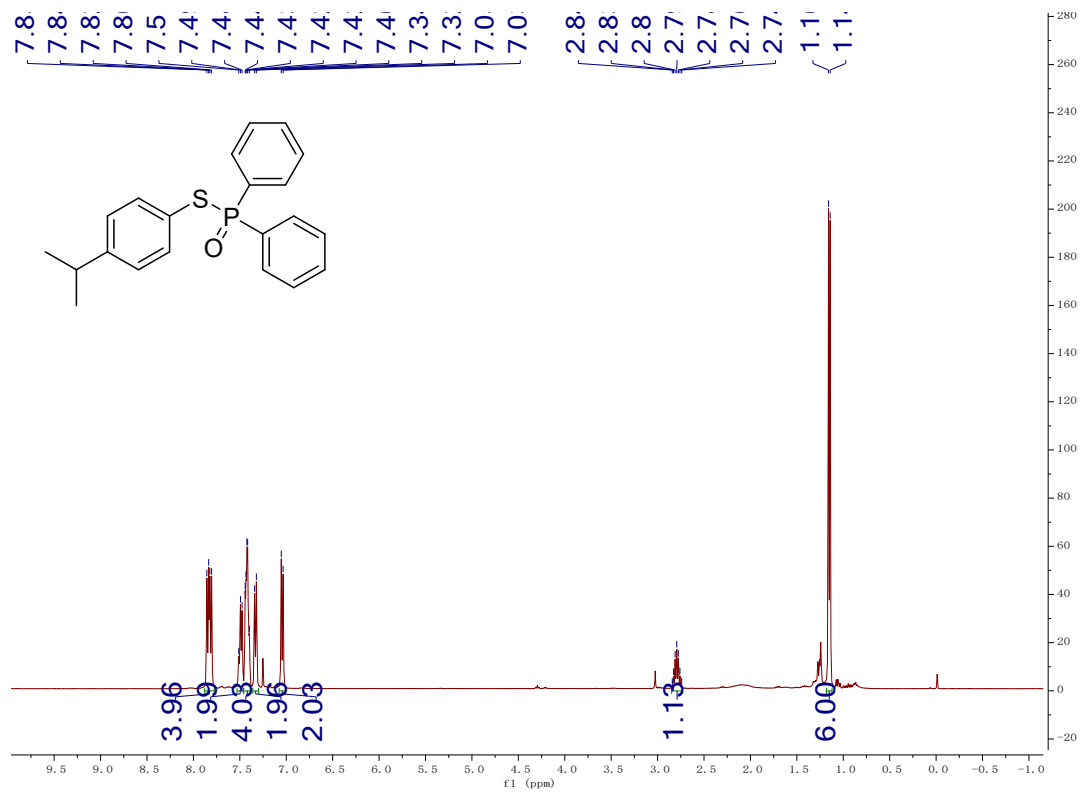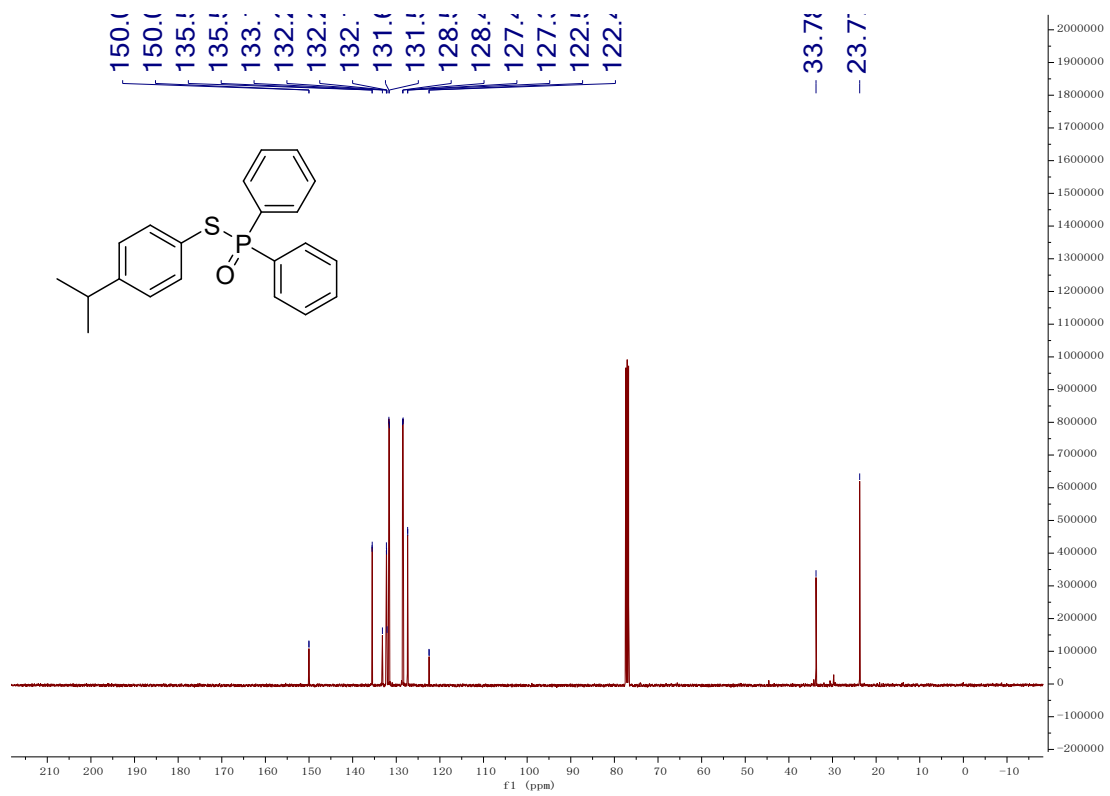

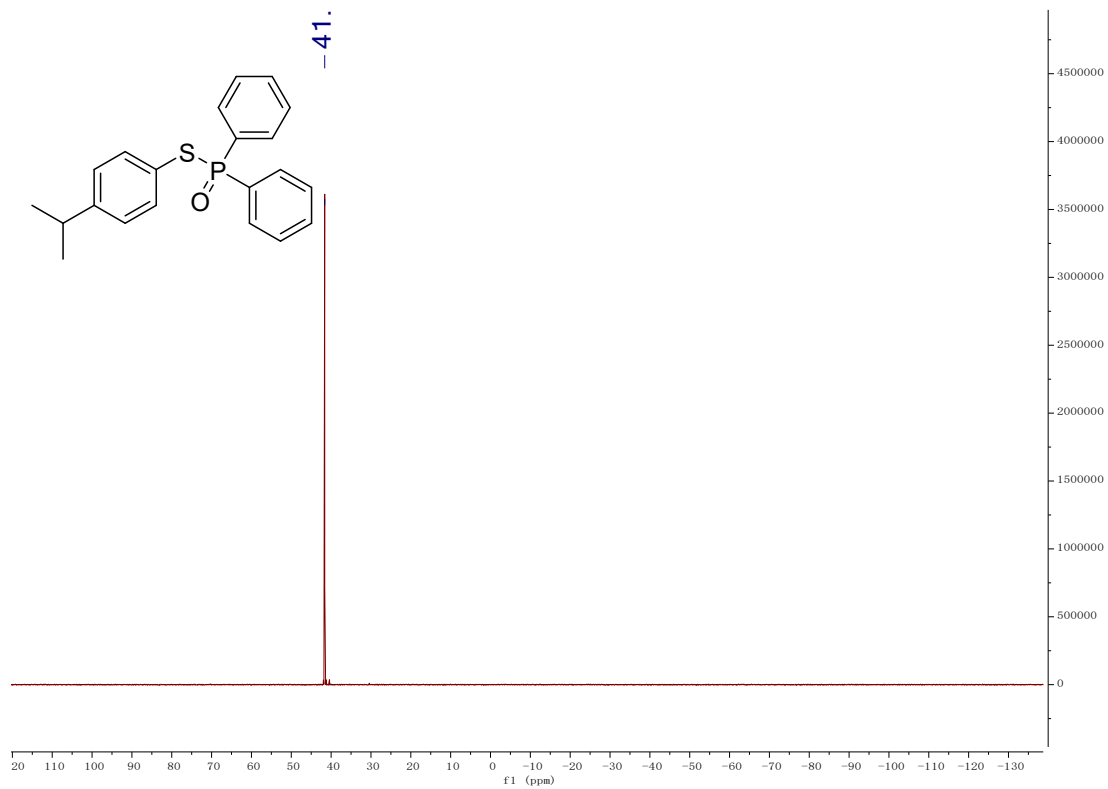

**S-(*p*-tolyl) diphenylphosphinothioate (3c)**

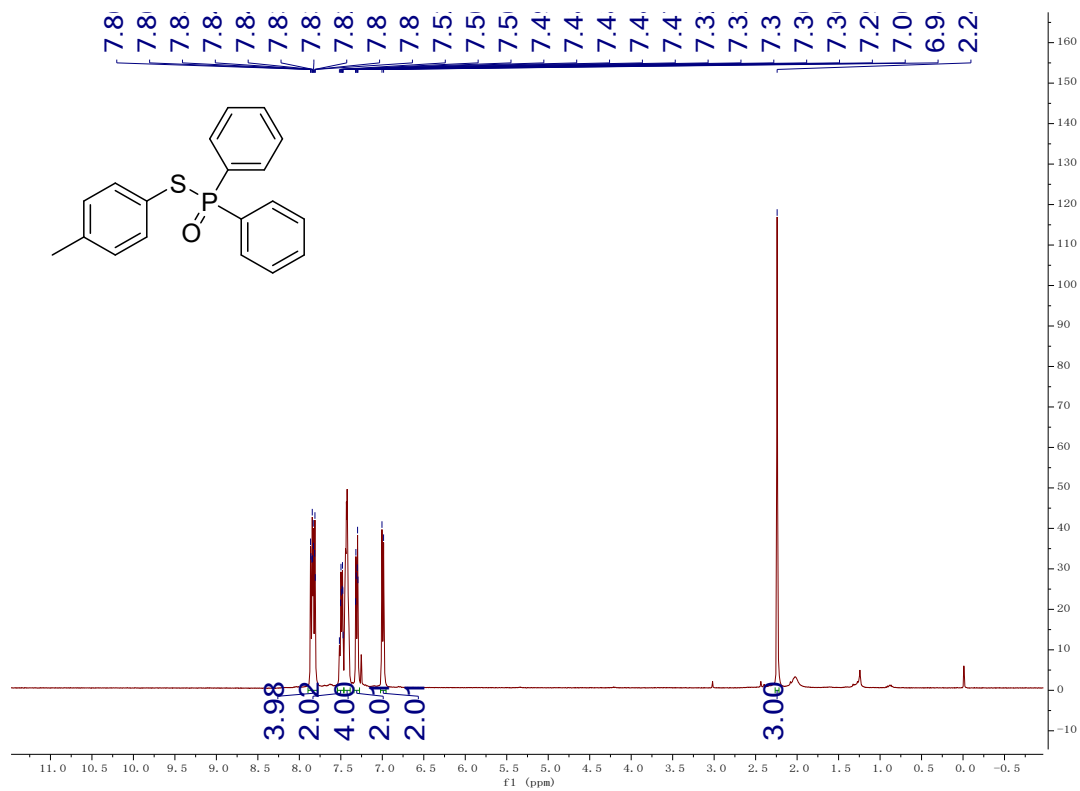

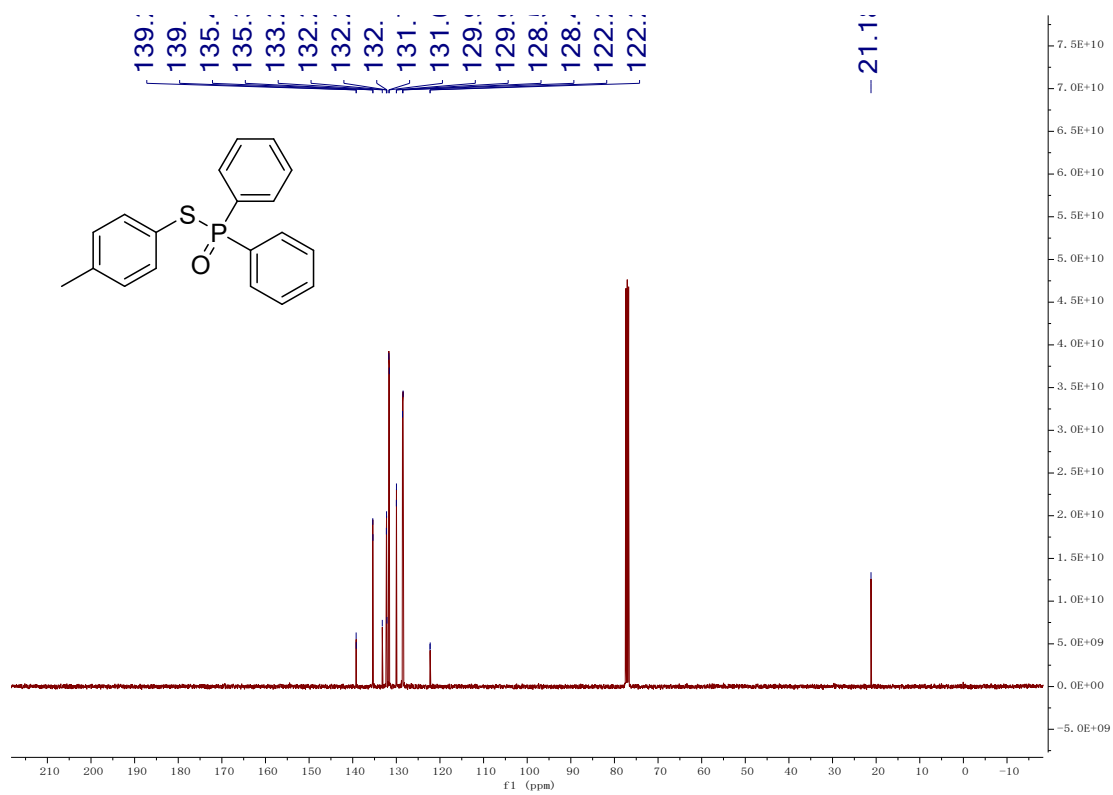



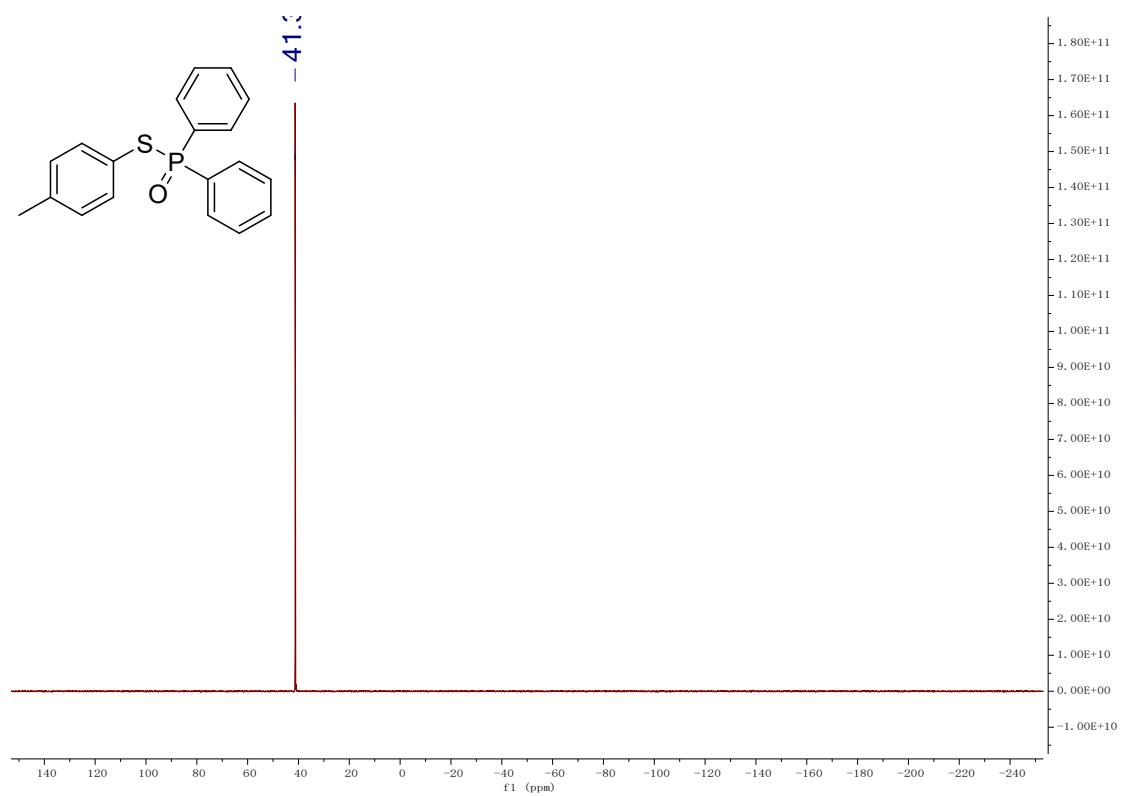

### Diphenyl(4-(tert-Butyl)phenyl)phosphine Oxide (3d)

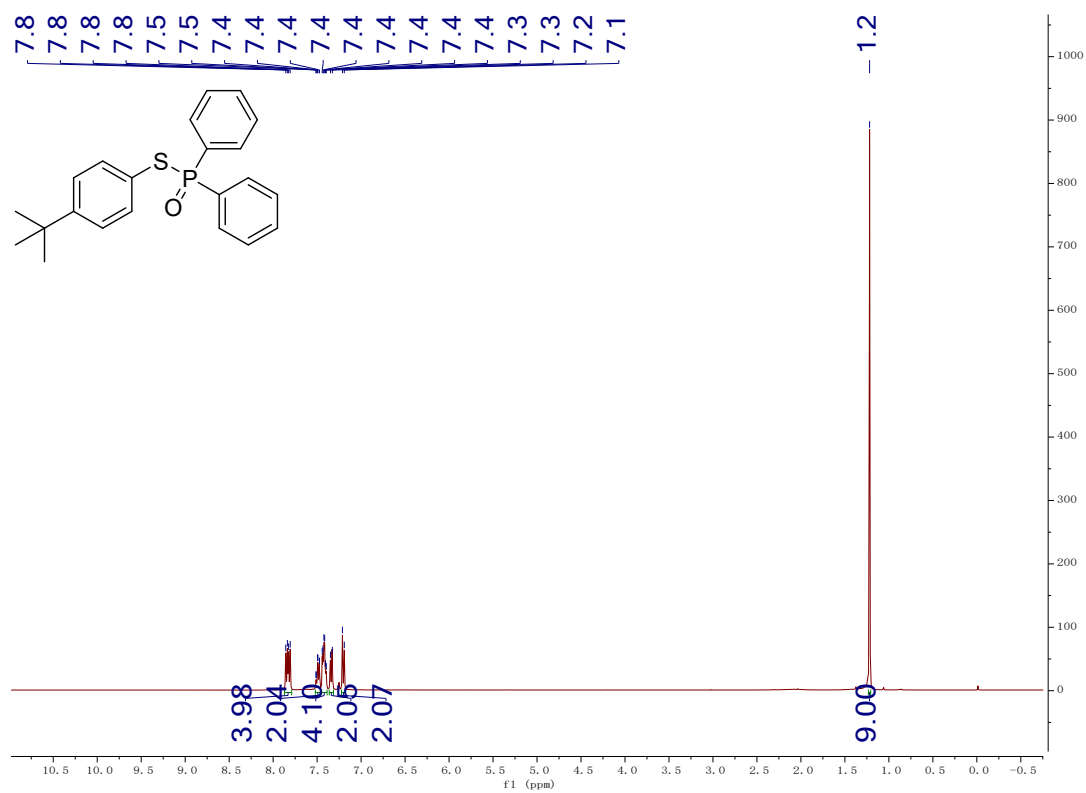

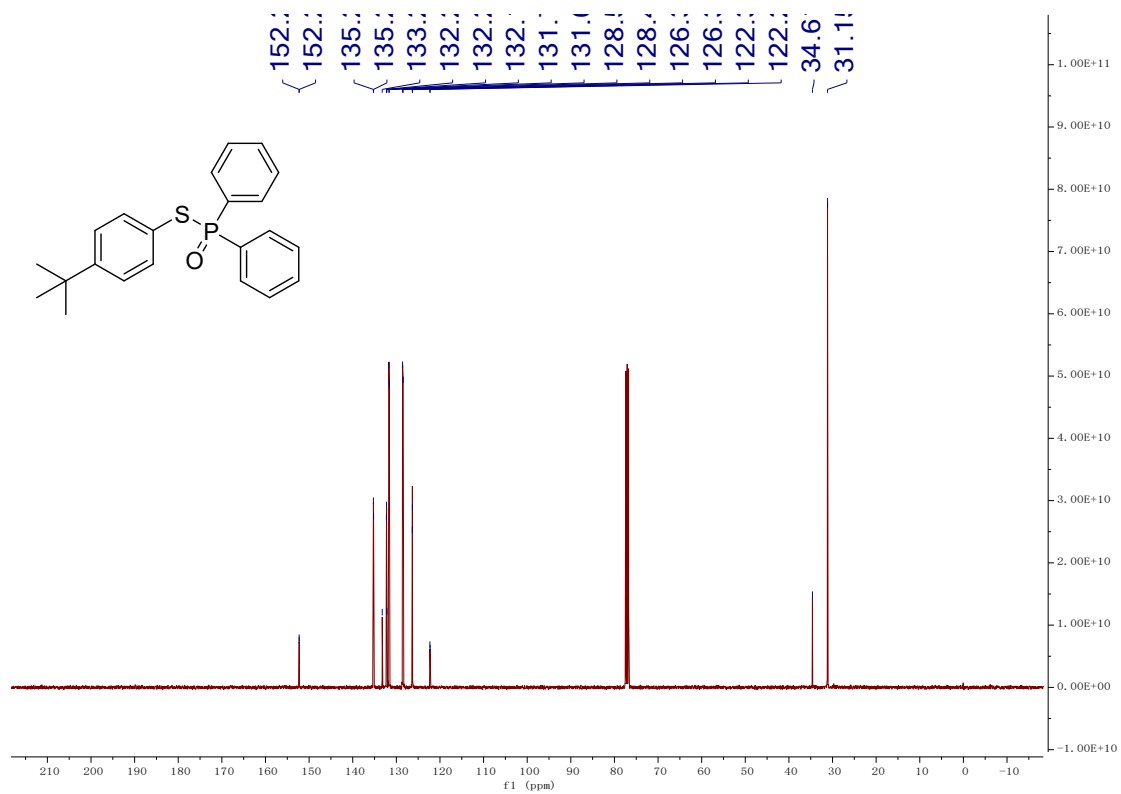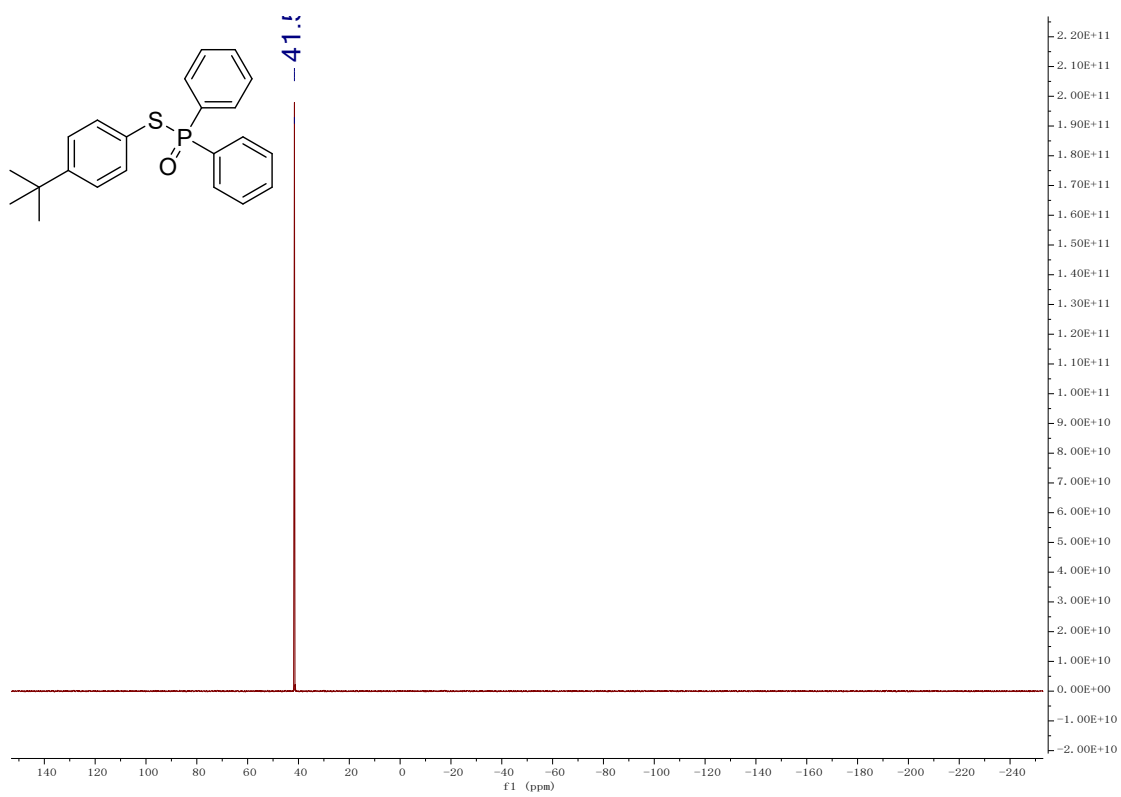

### S-(4-fluorophenyl) diphenylphosphinothioate (3e)

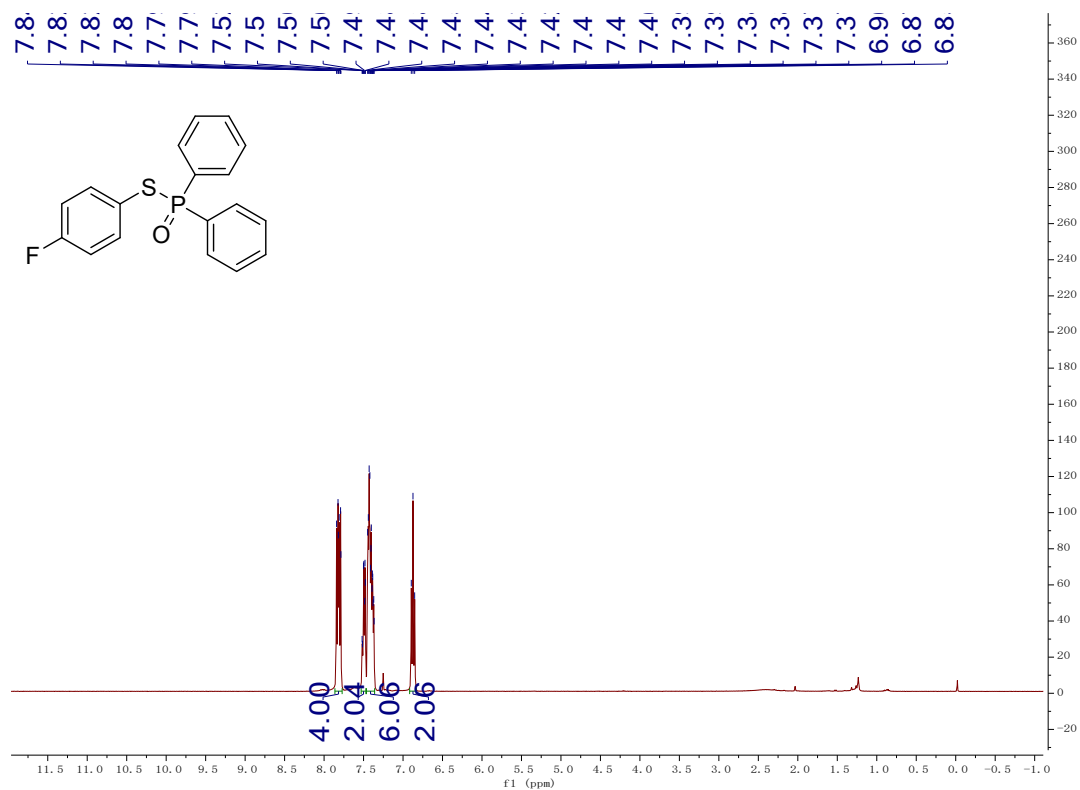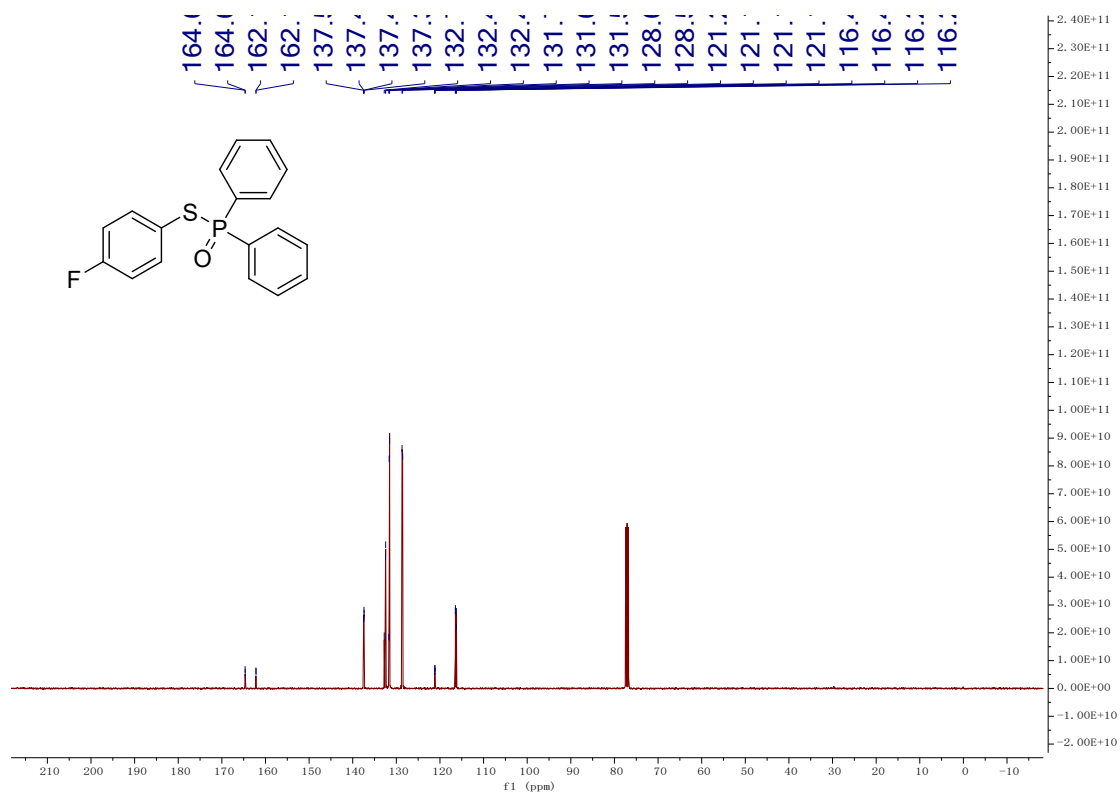

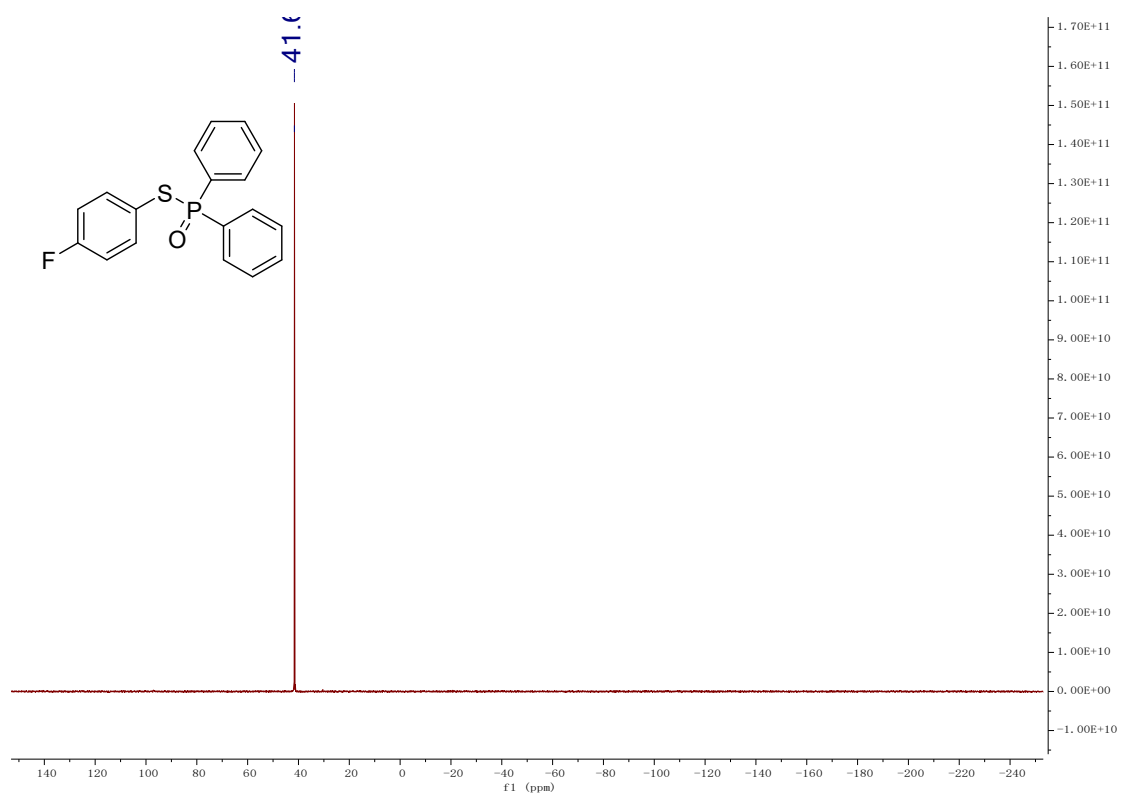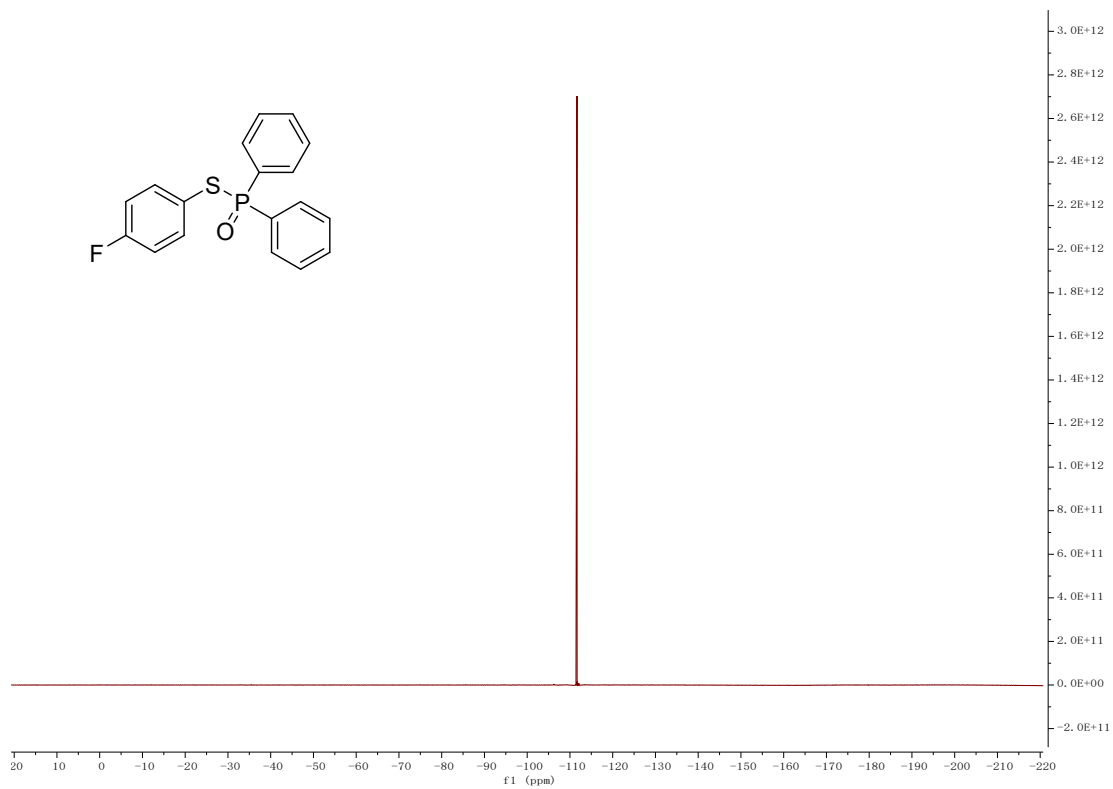

**S-(4-chlorophenyl) diphenylphosphinothioate (3f)**

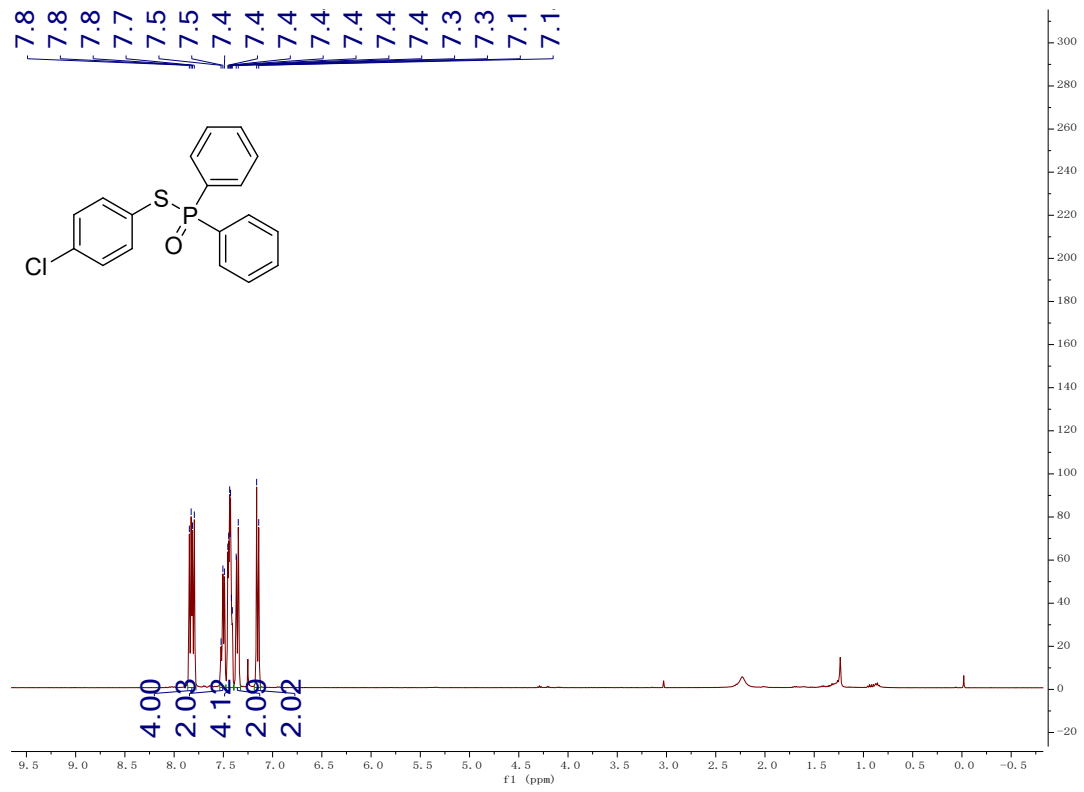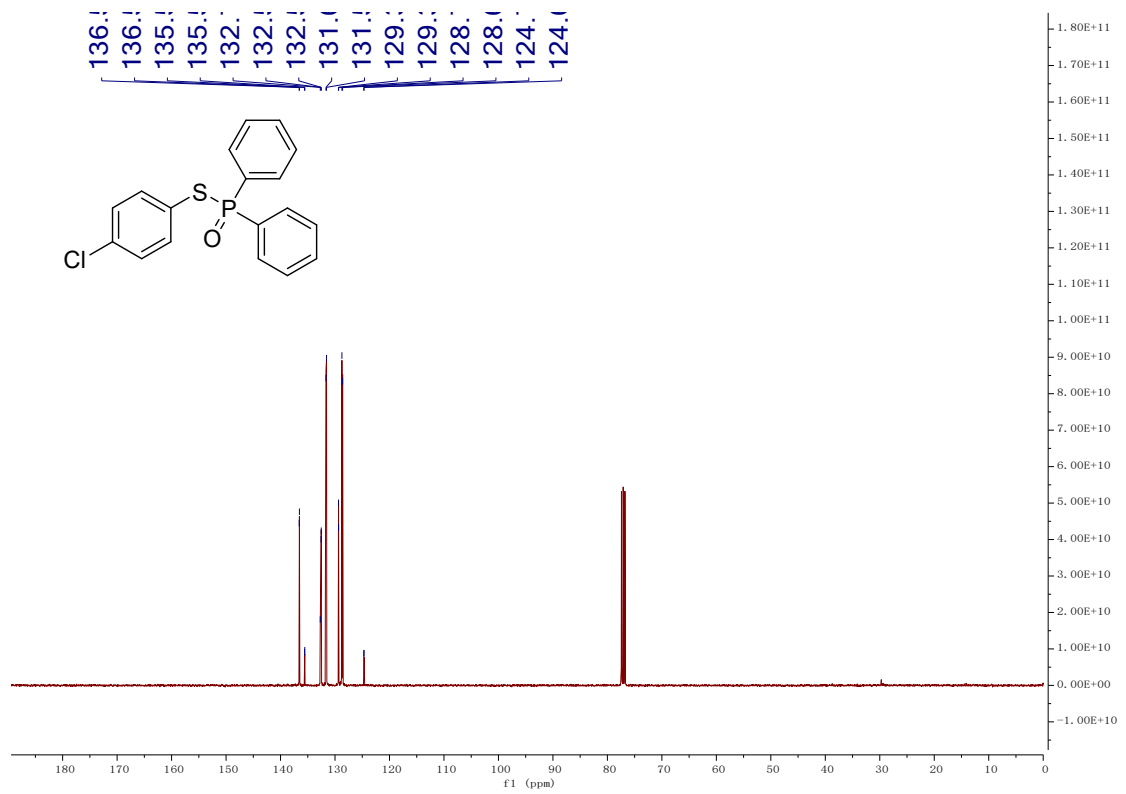

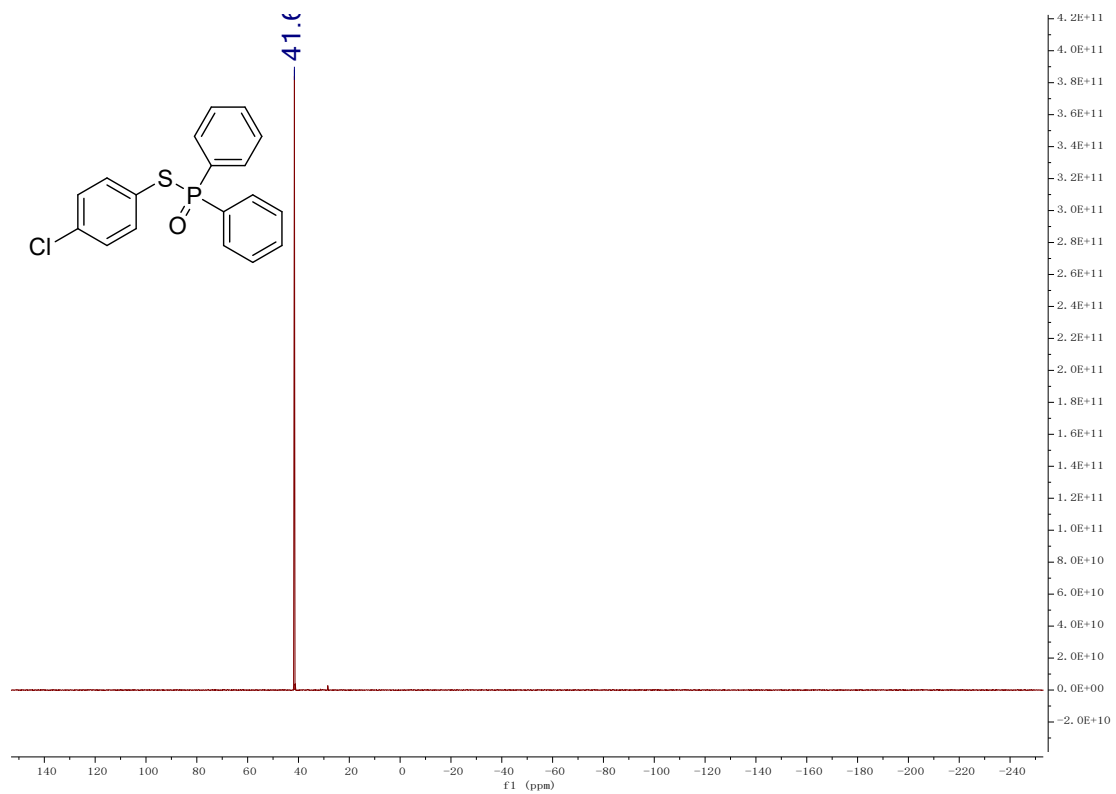

**S-(4-bromophenyl) diphenylphosphinothioate (3g)**

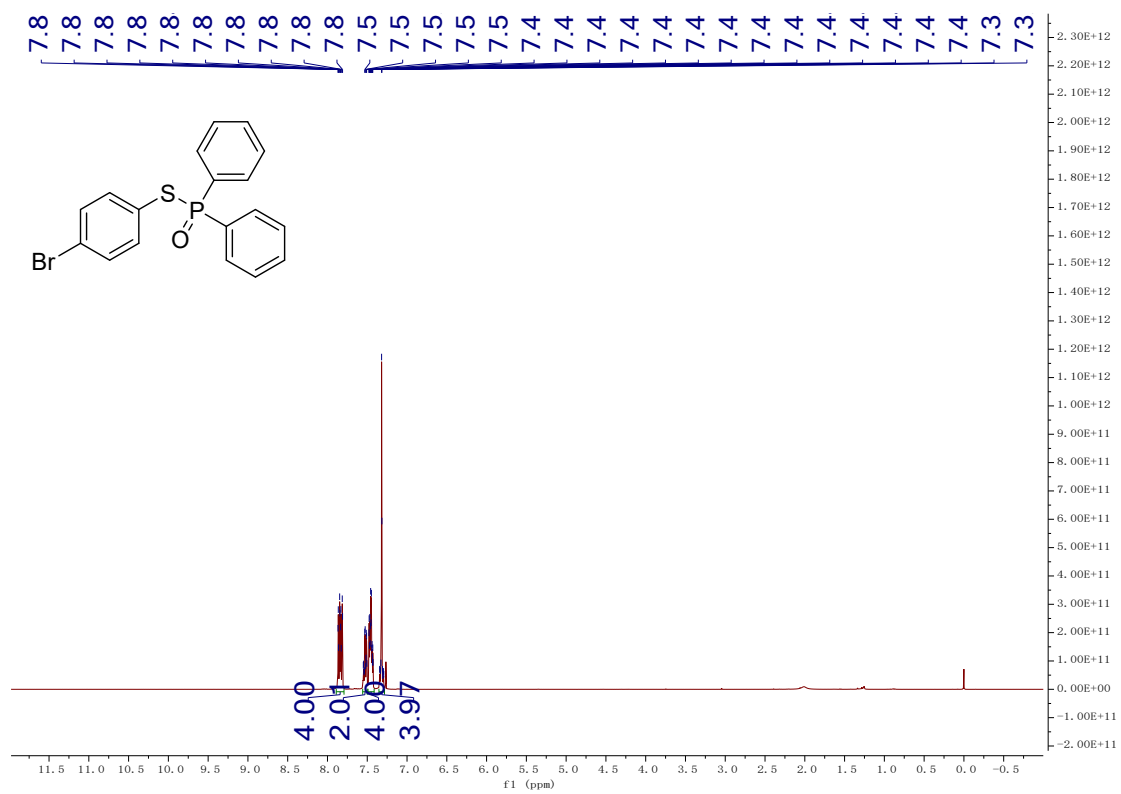

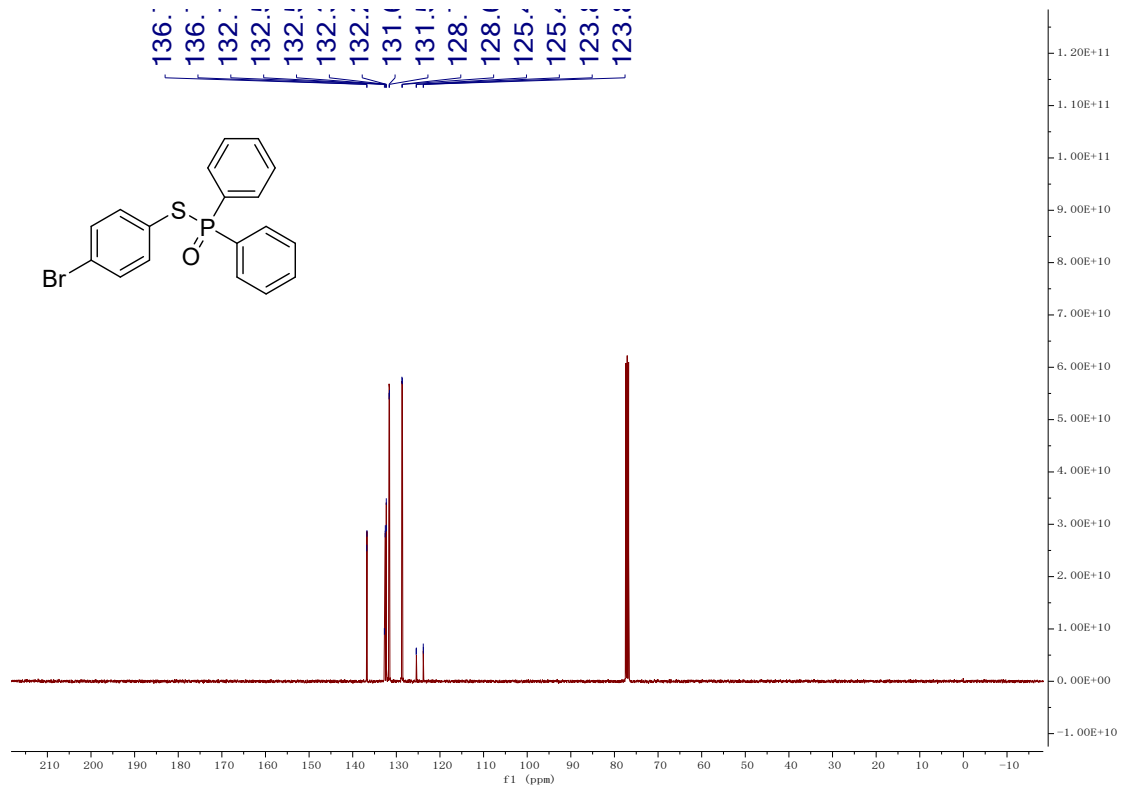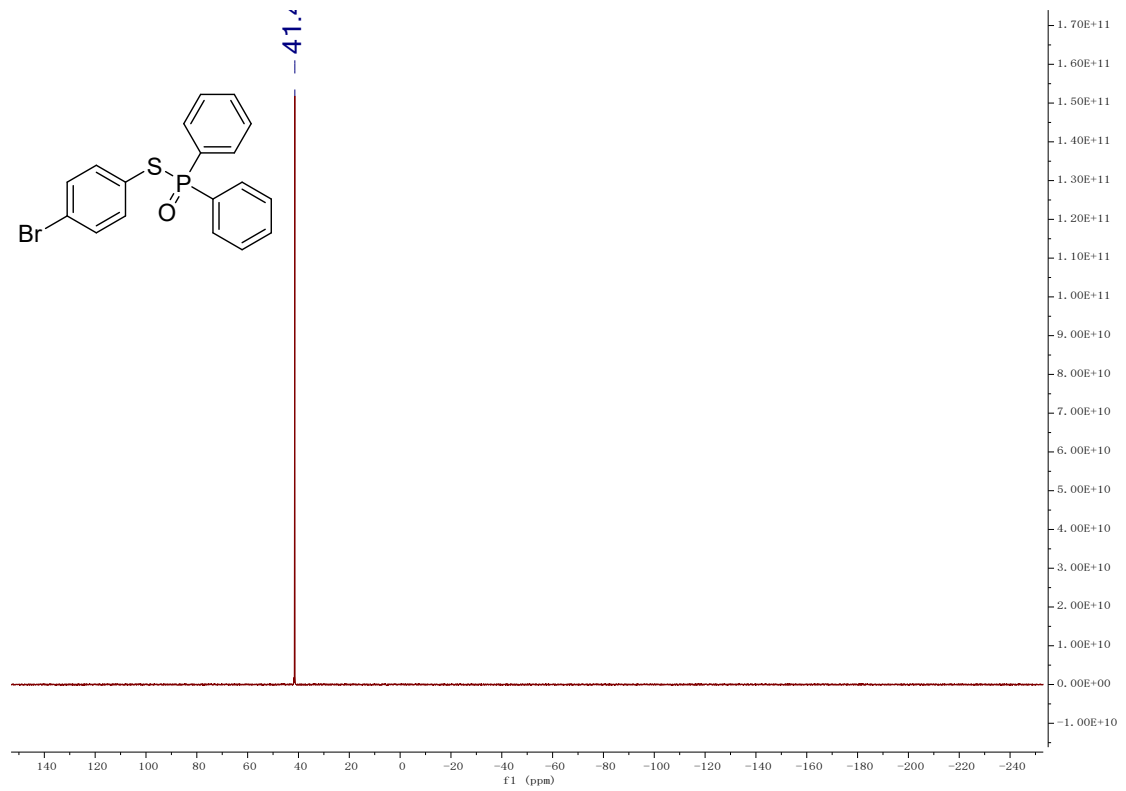

### S-(4-methoxyphenyl) diphenylphosphinothioate (3h)

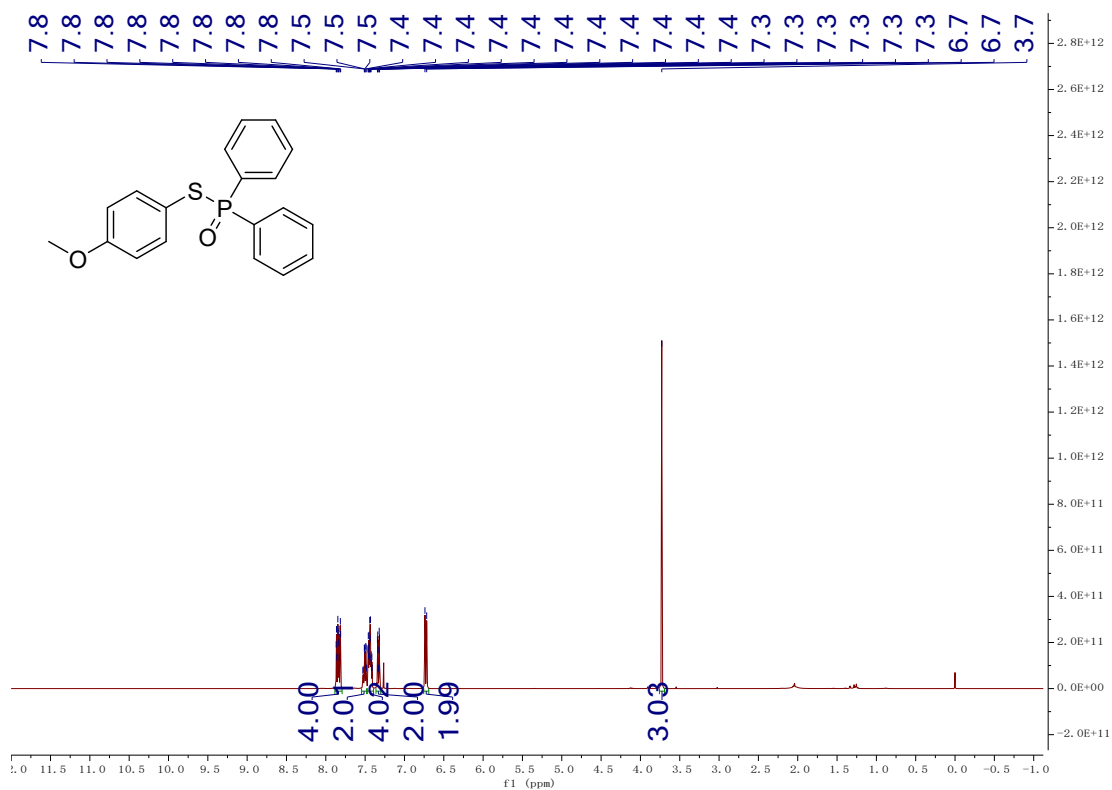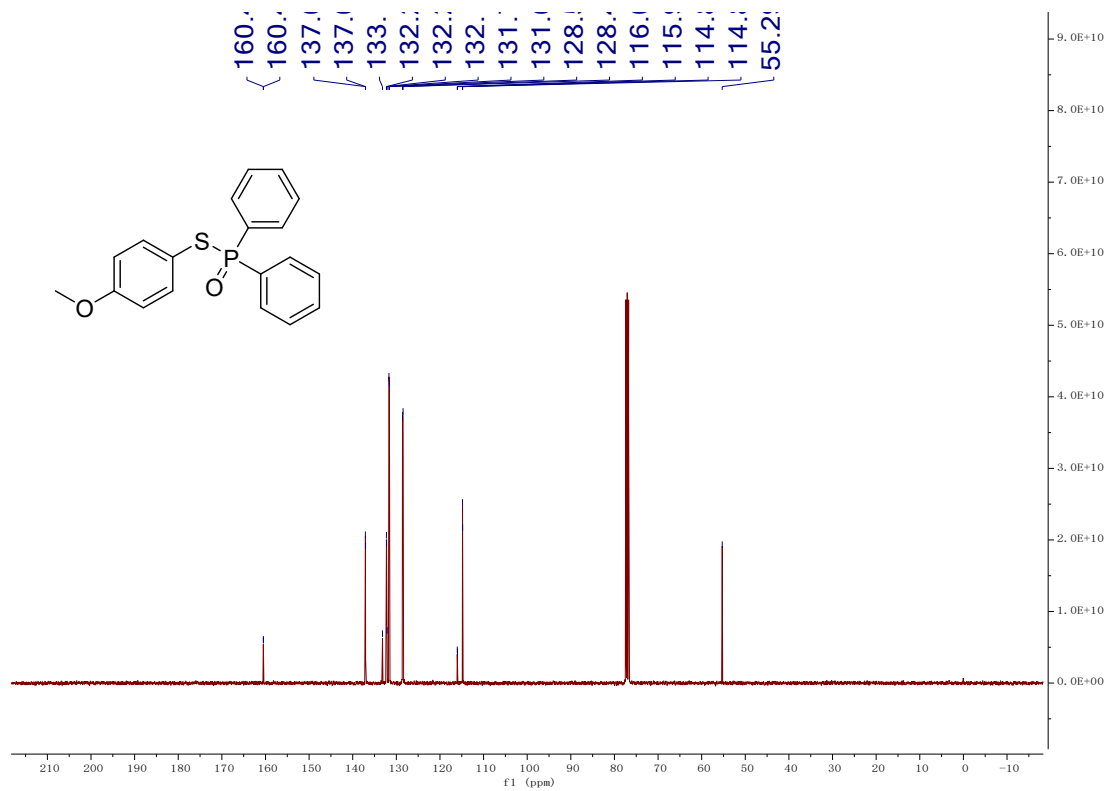



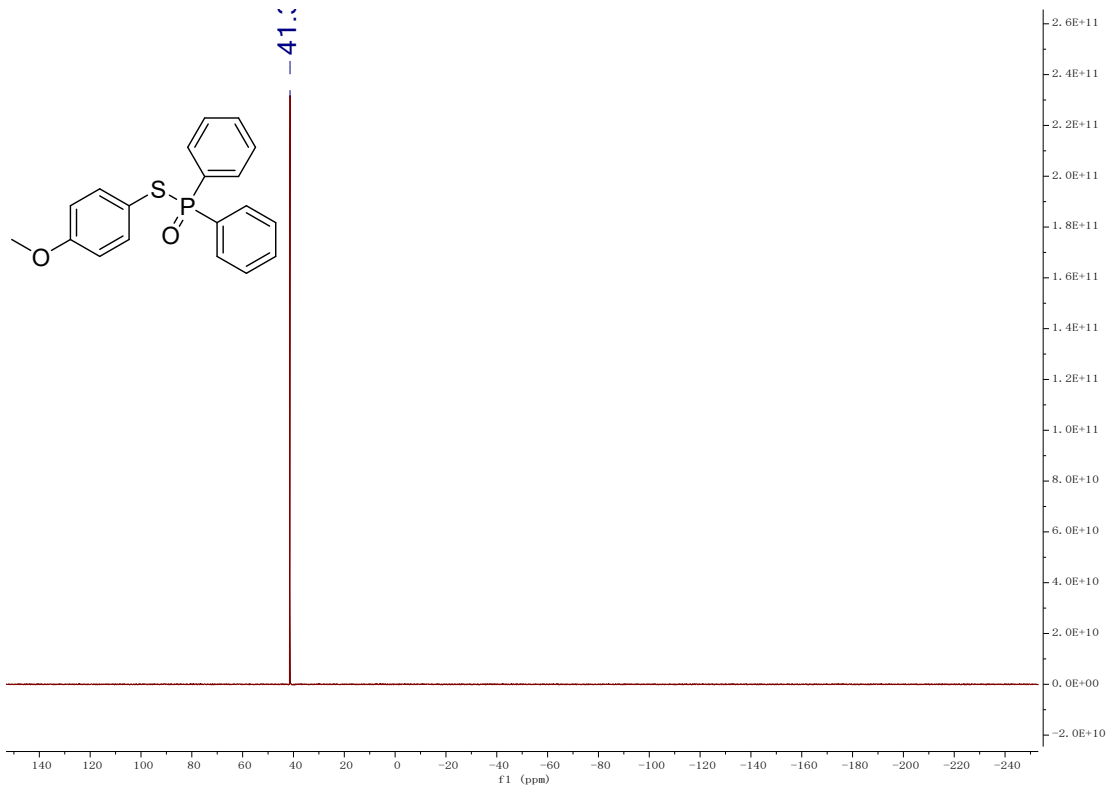

**S-(4-(trifluoromethyl)phenyl) diphenylphosphinothioate (3i)**

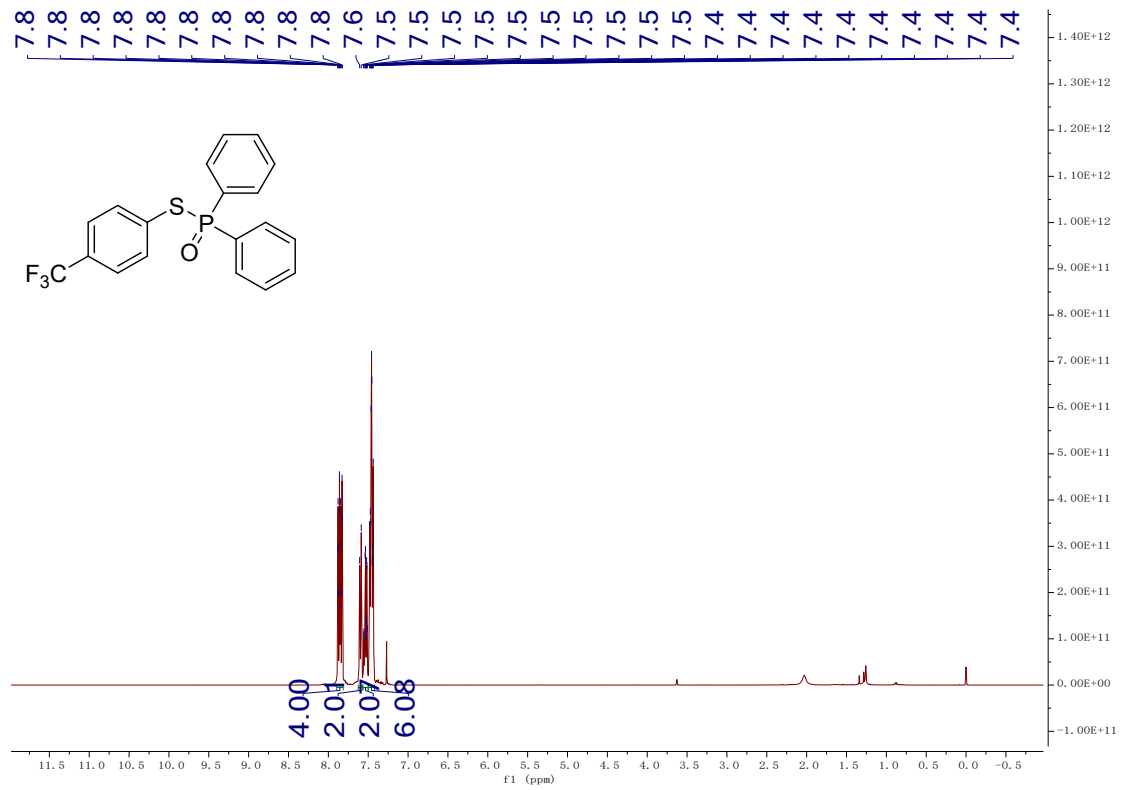

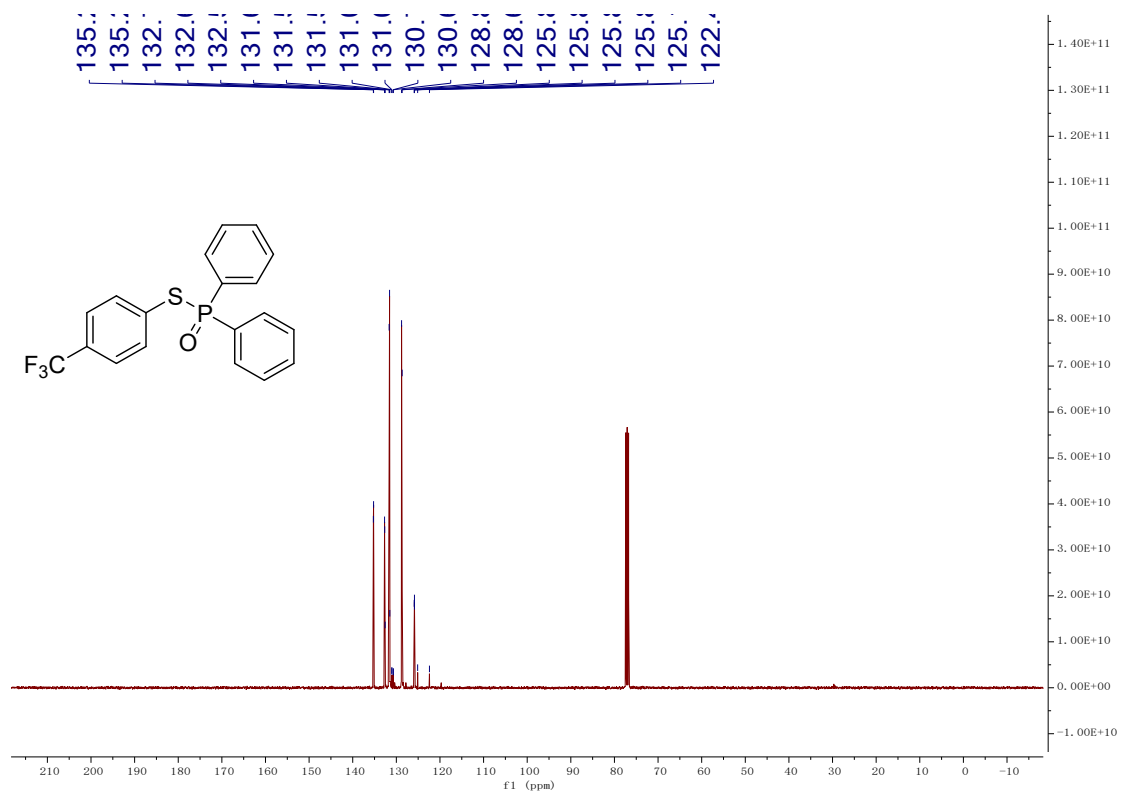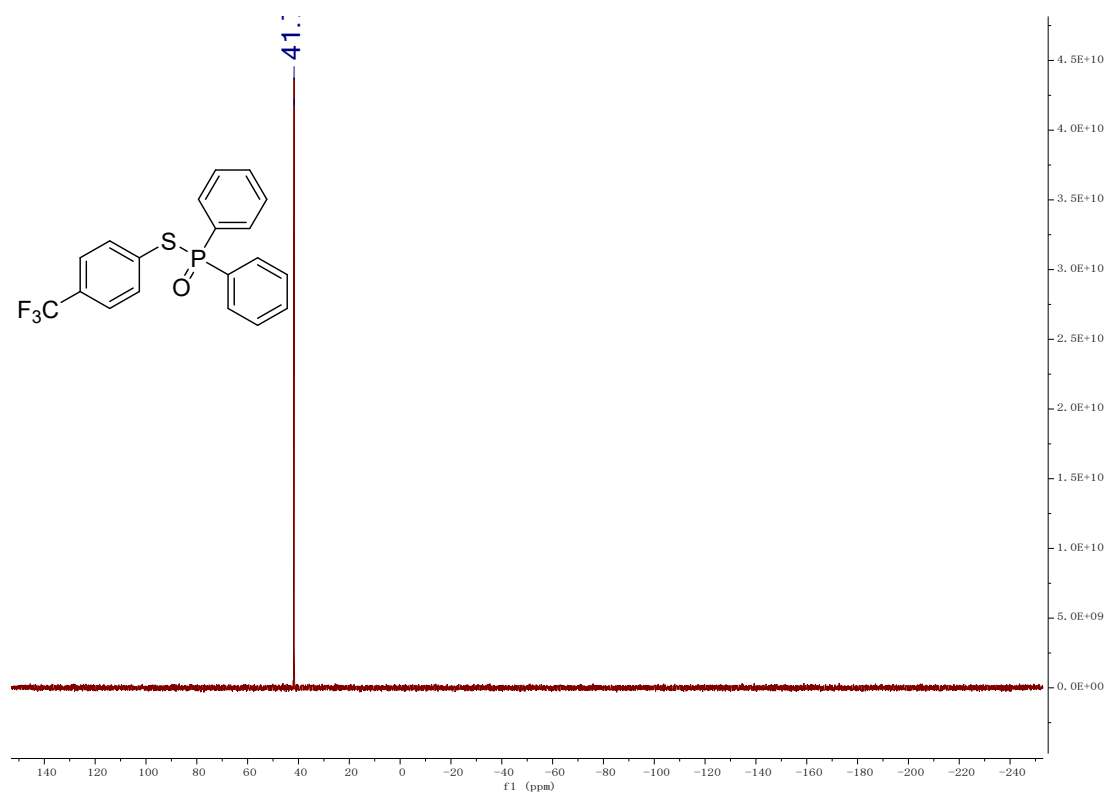

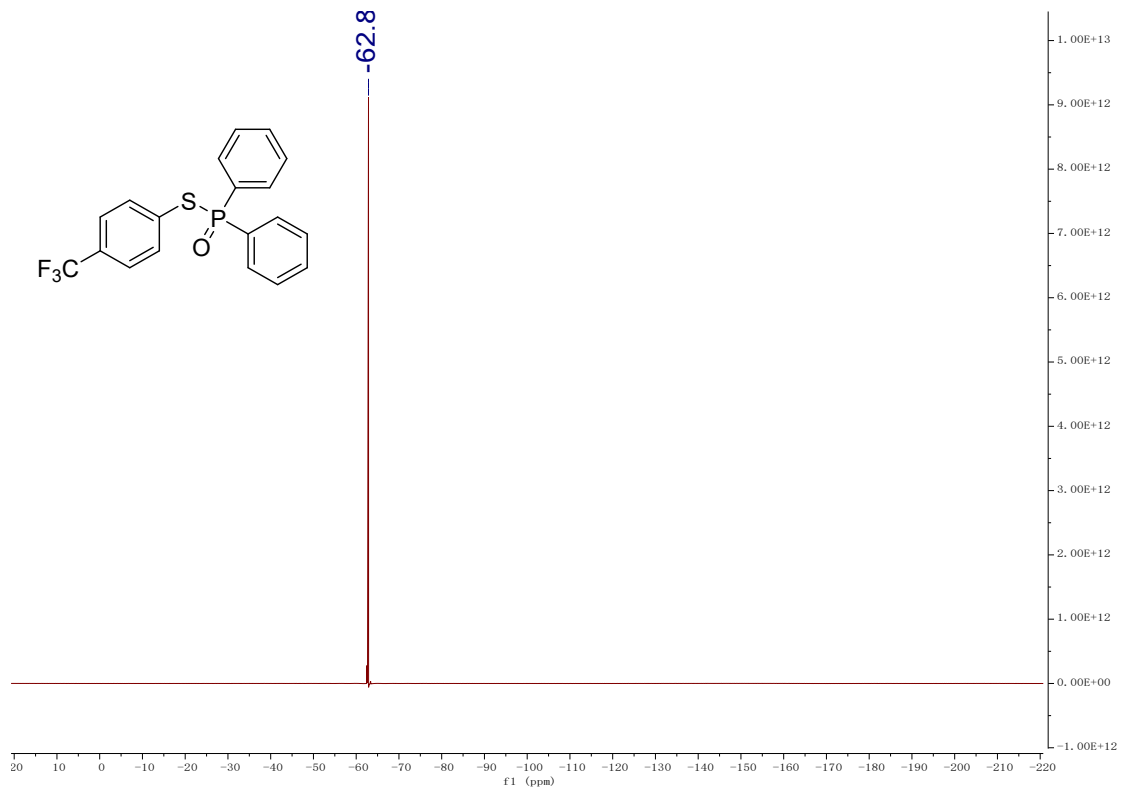

**S-(4-nitrophenyl) diphenylphosphinothioate (3j)**

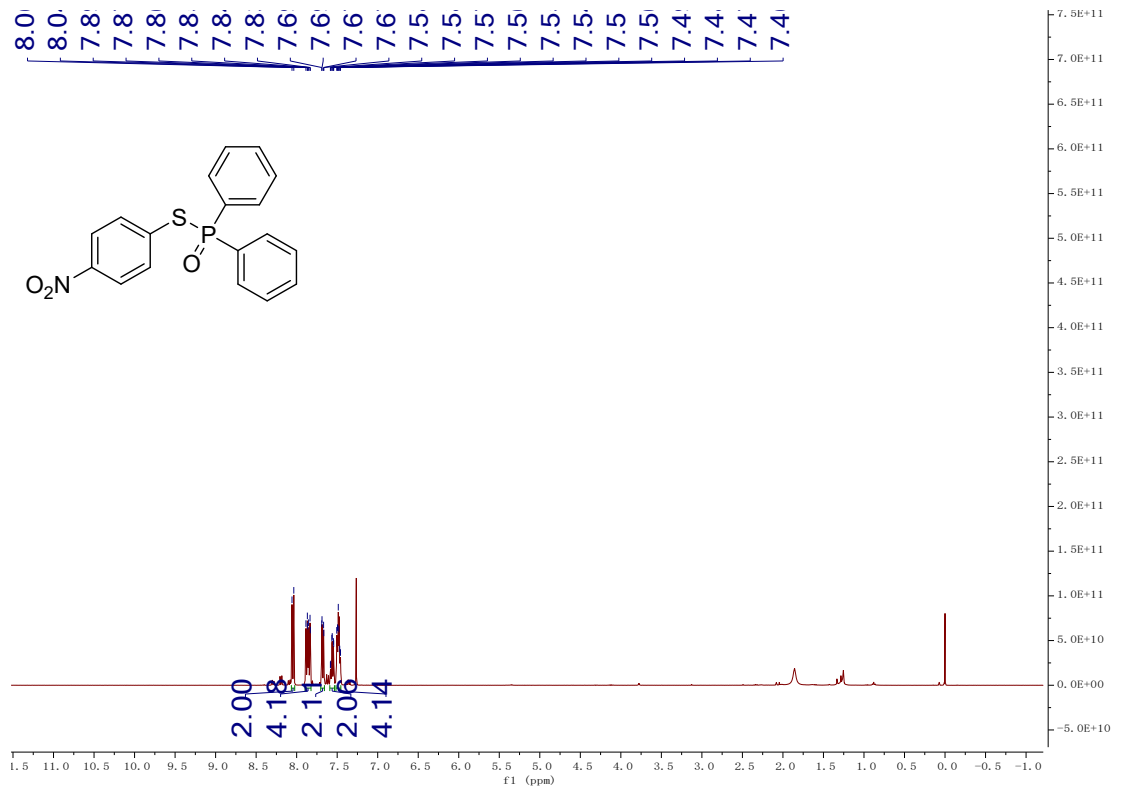

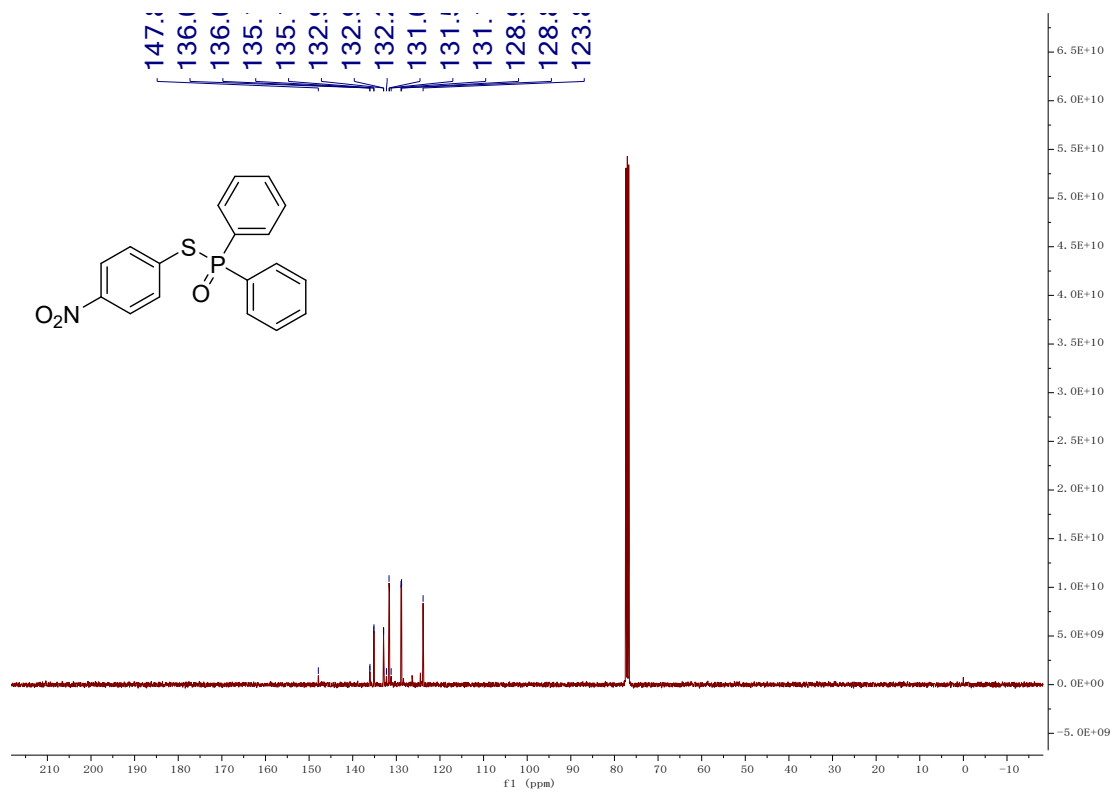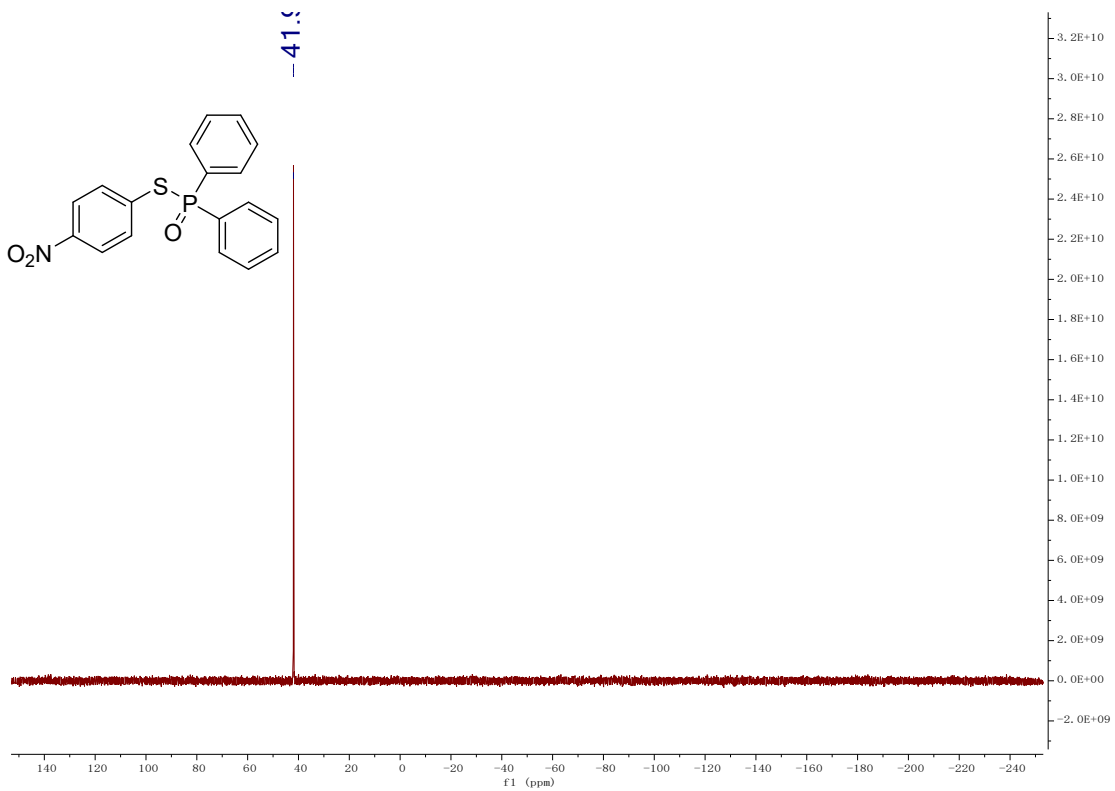

### S-(3-fluorophenyl) diphenylphosphinothioate (3k)

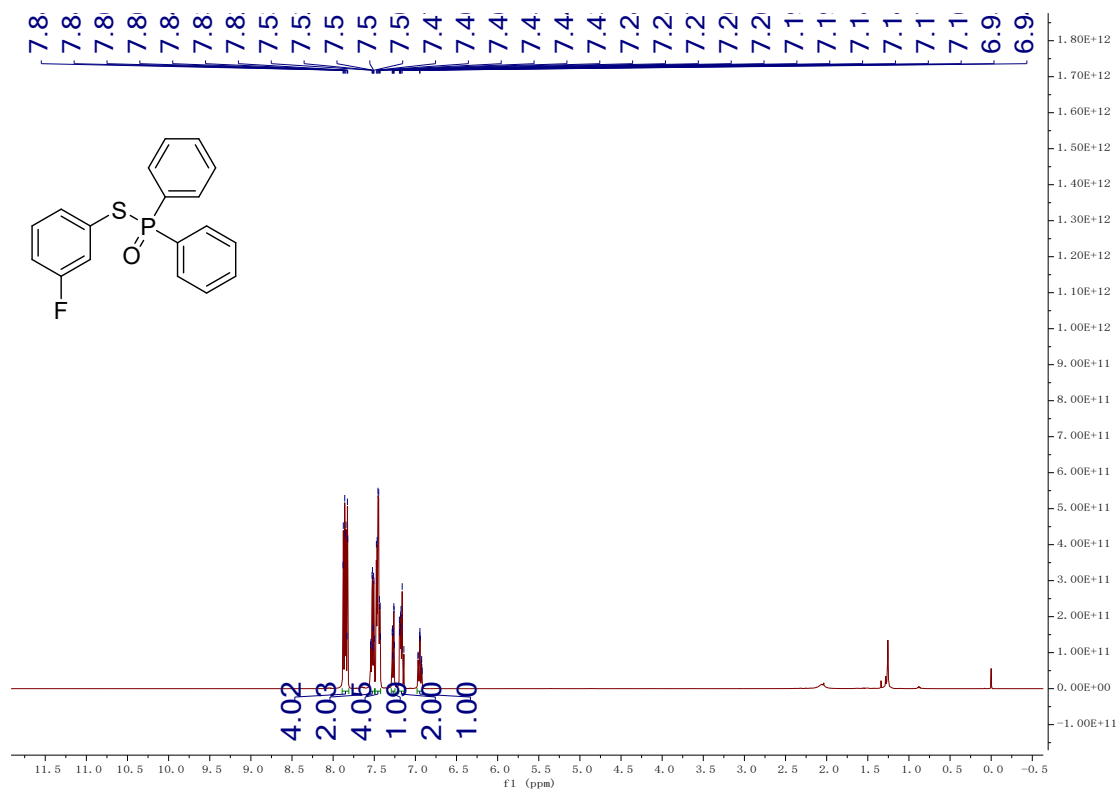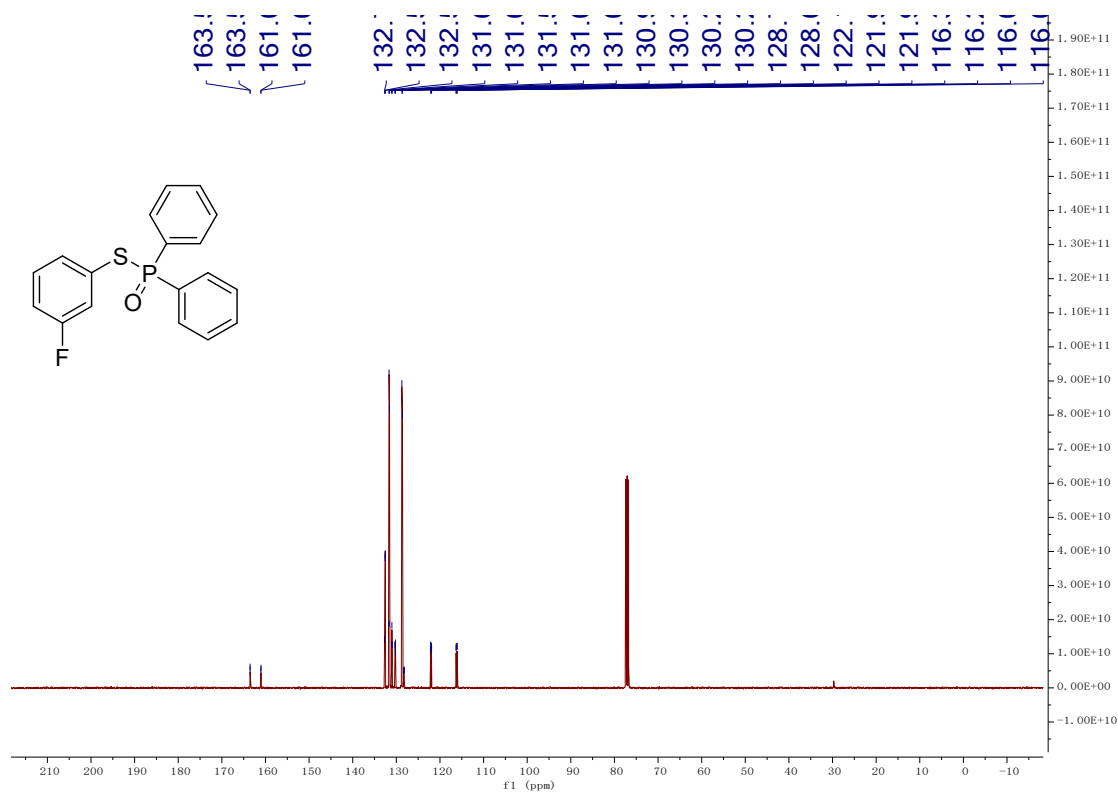

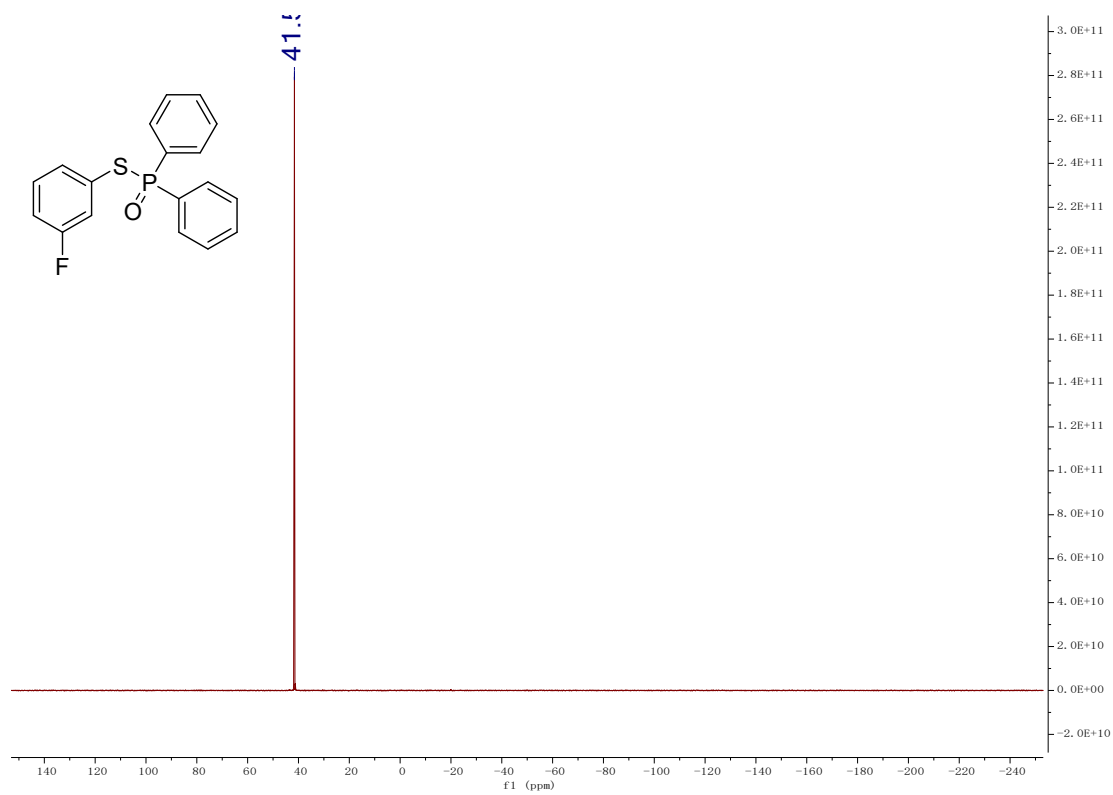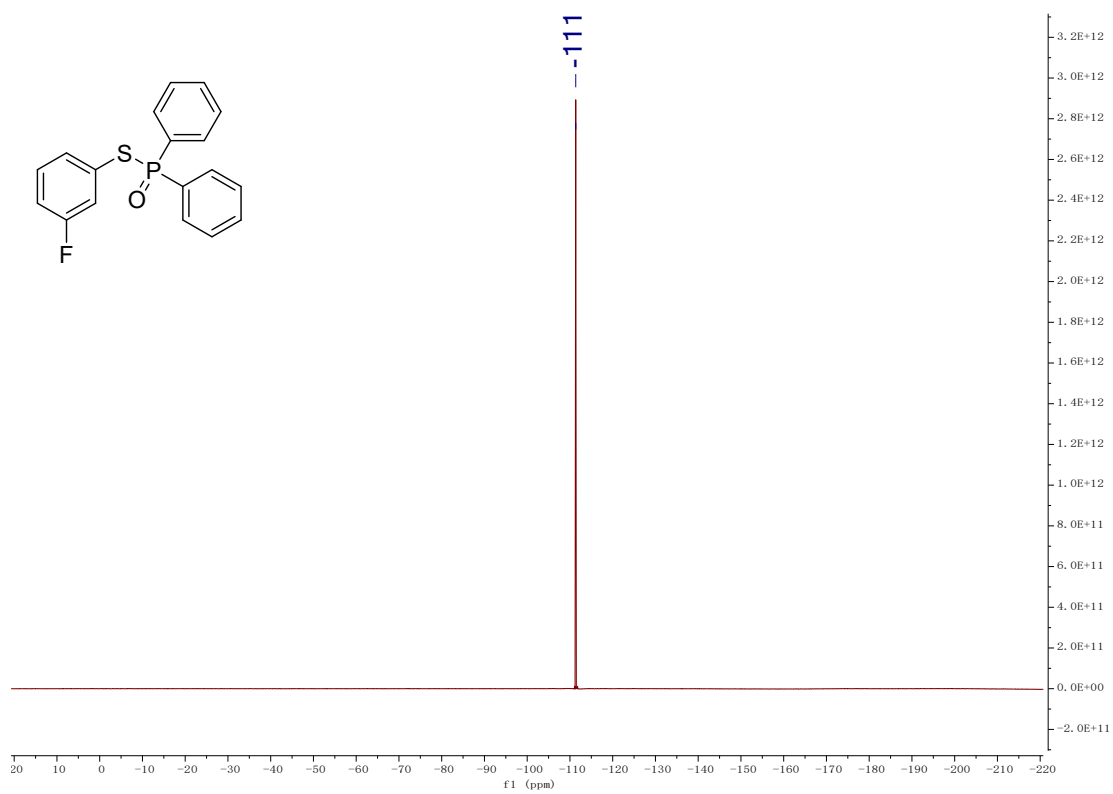

### S-(2-fluorophenyl) diphenylphosphinothioate (3l)

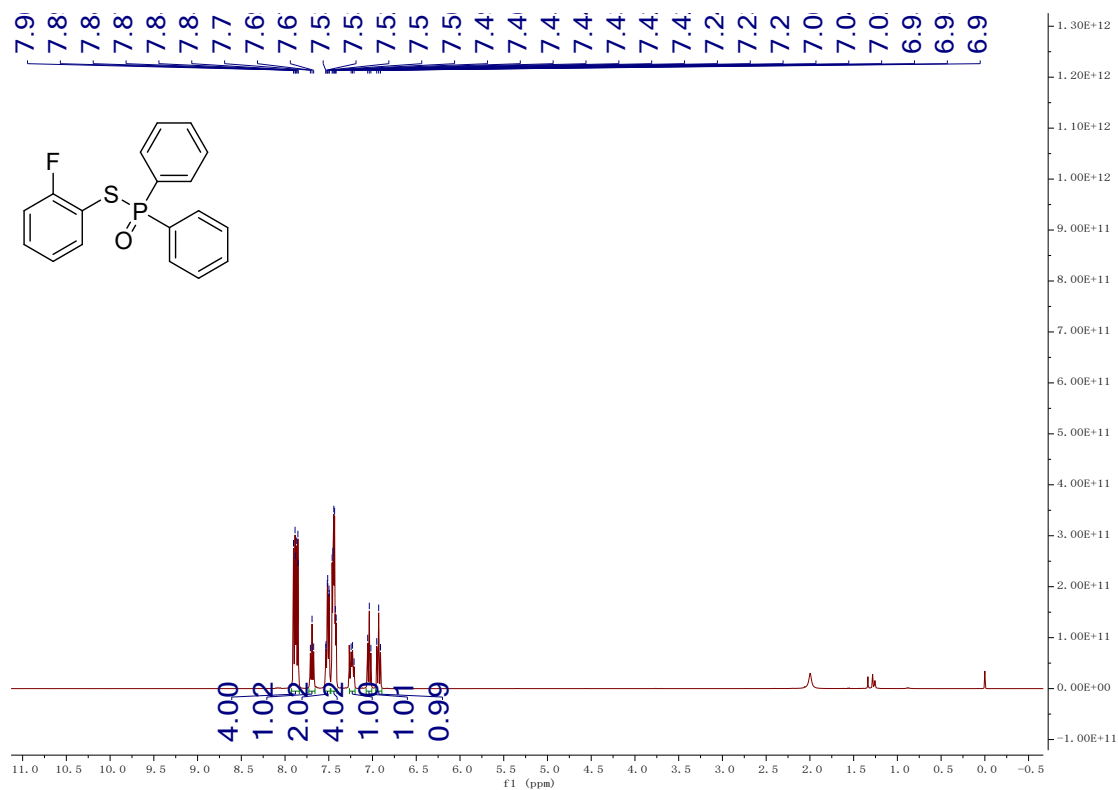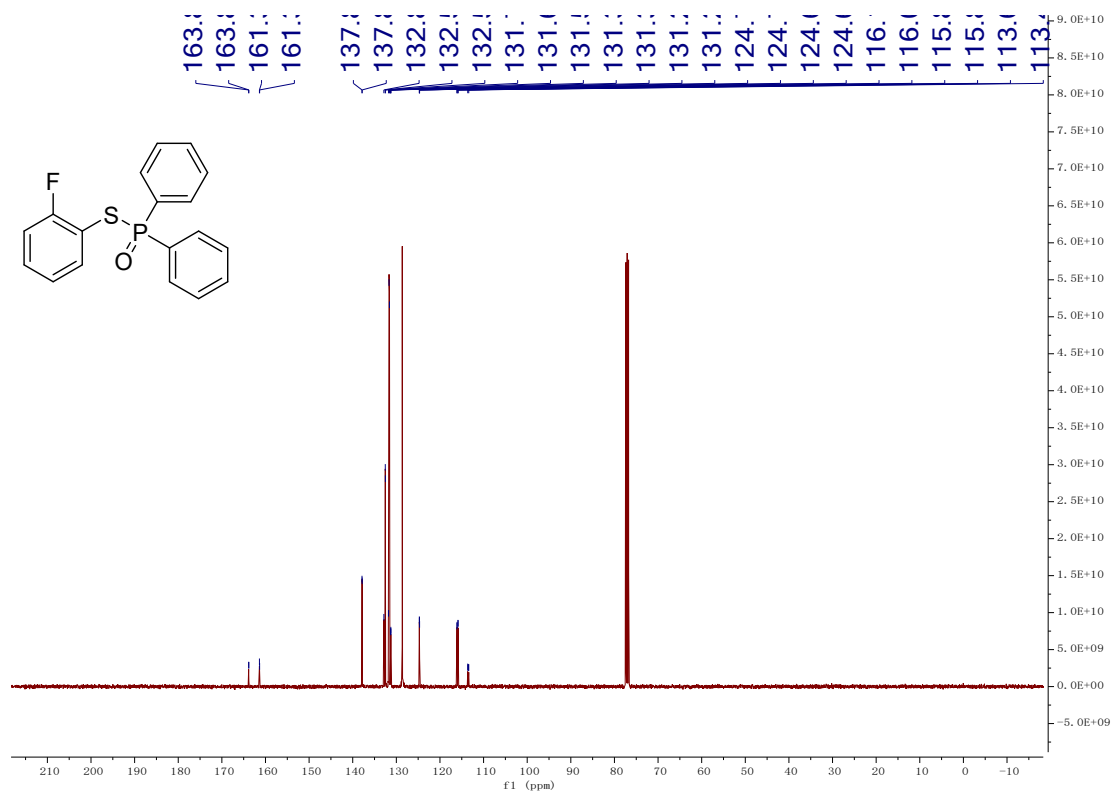

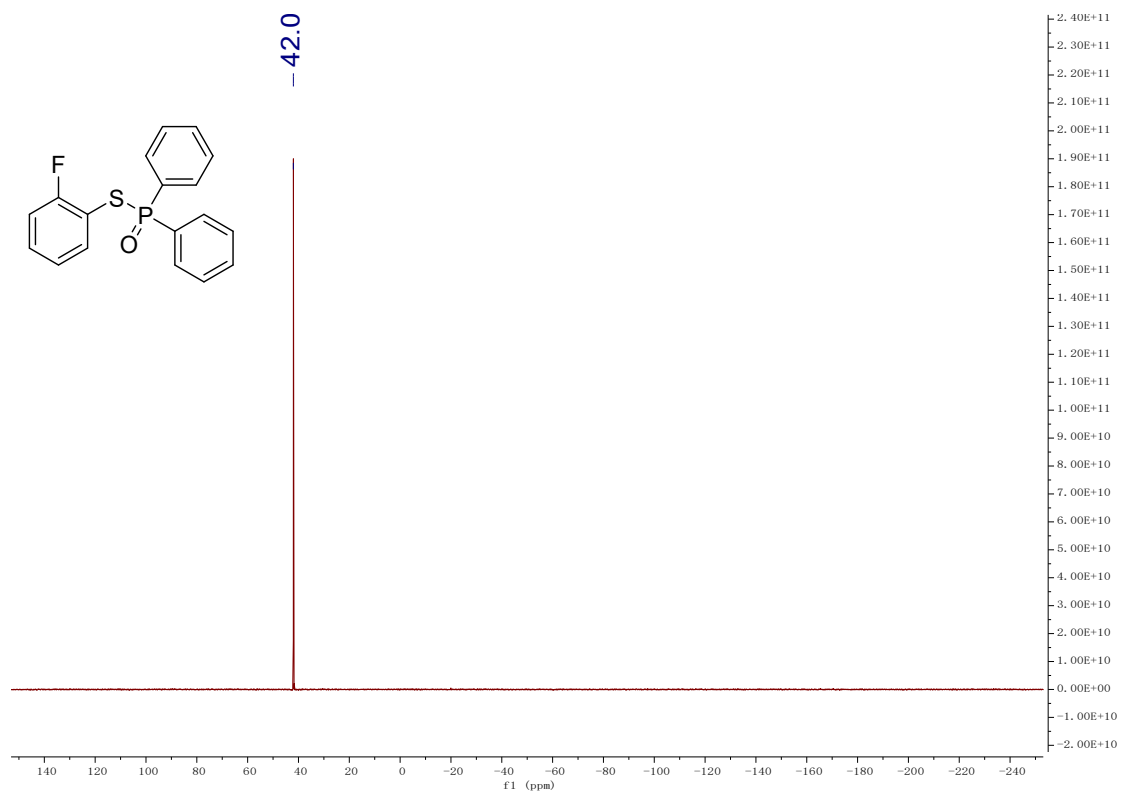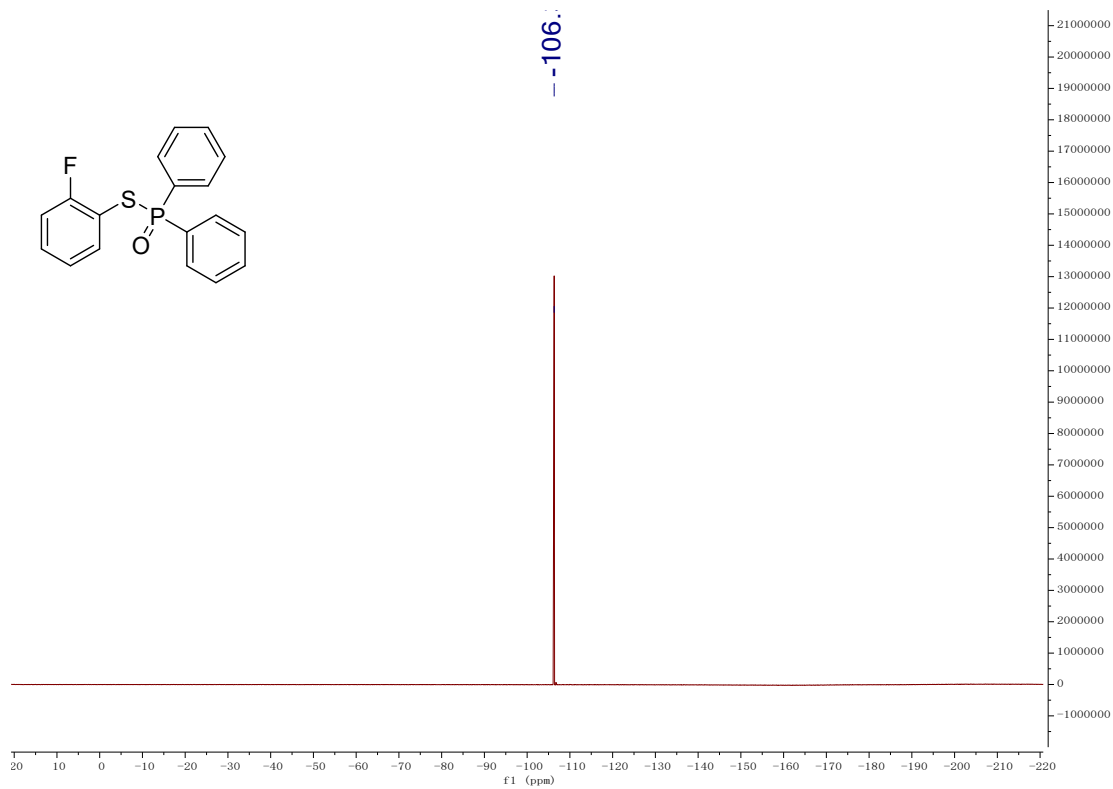



### S-(m-tolyl) diphenylphosphinothioate (3m)

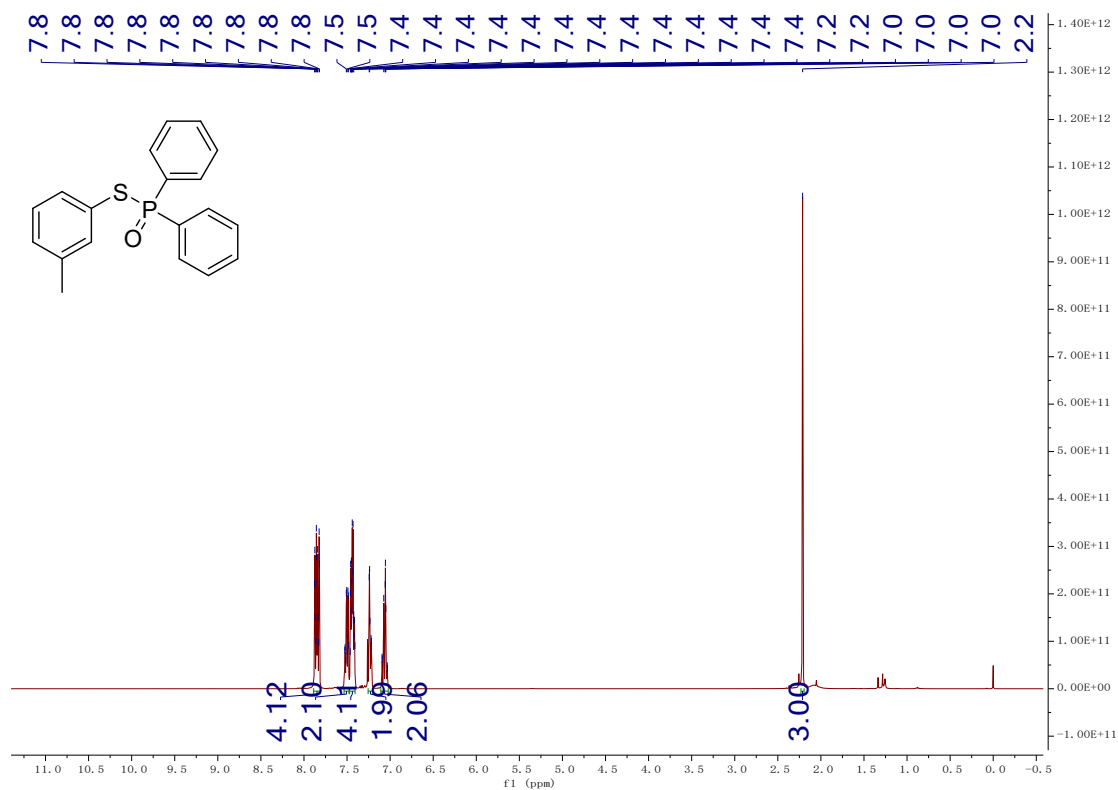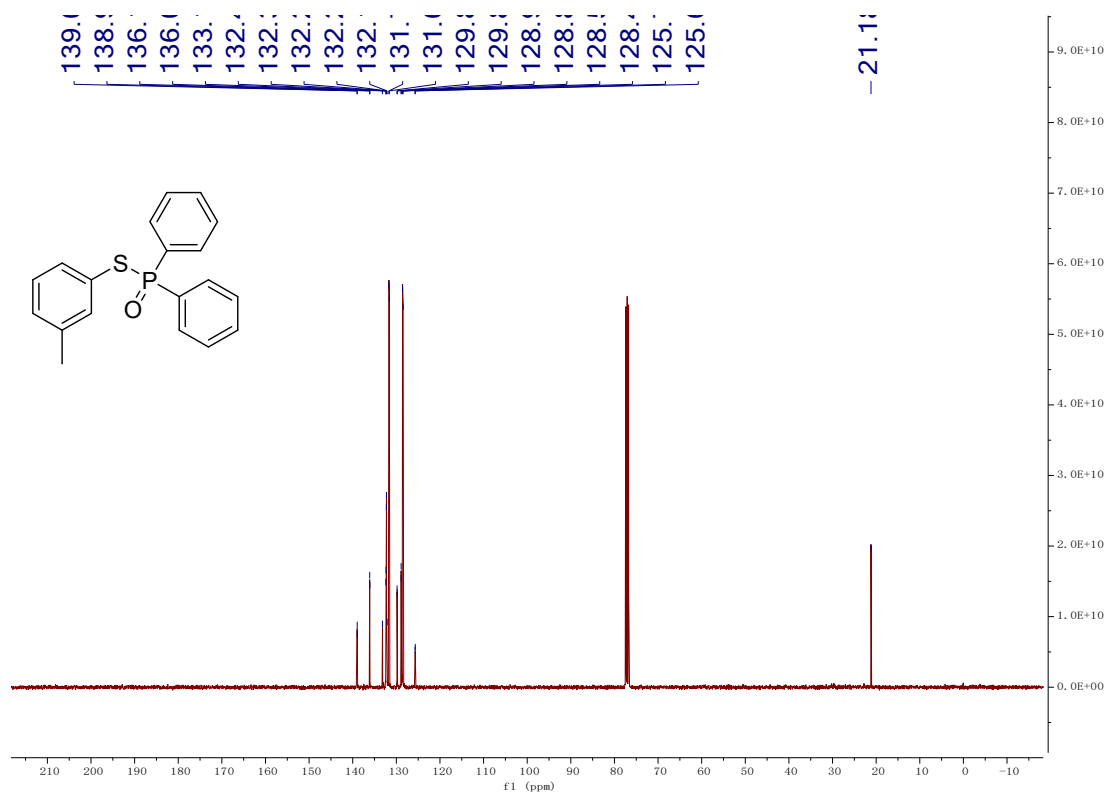



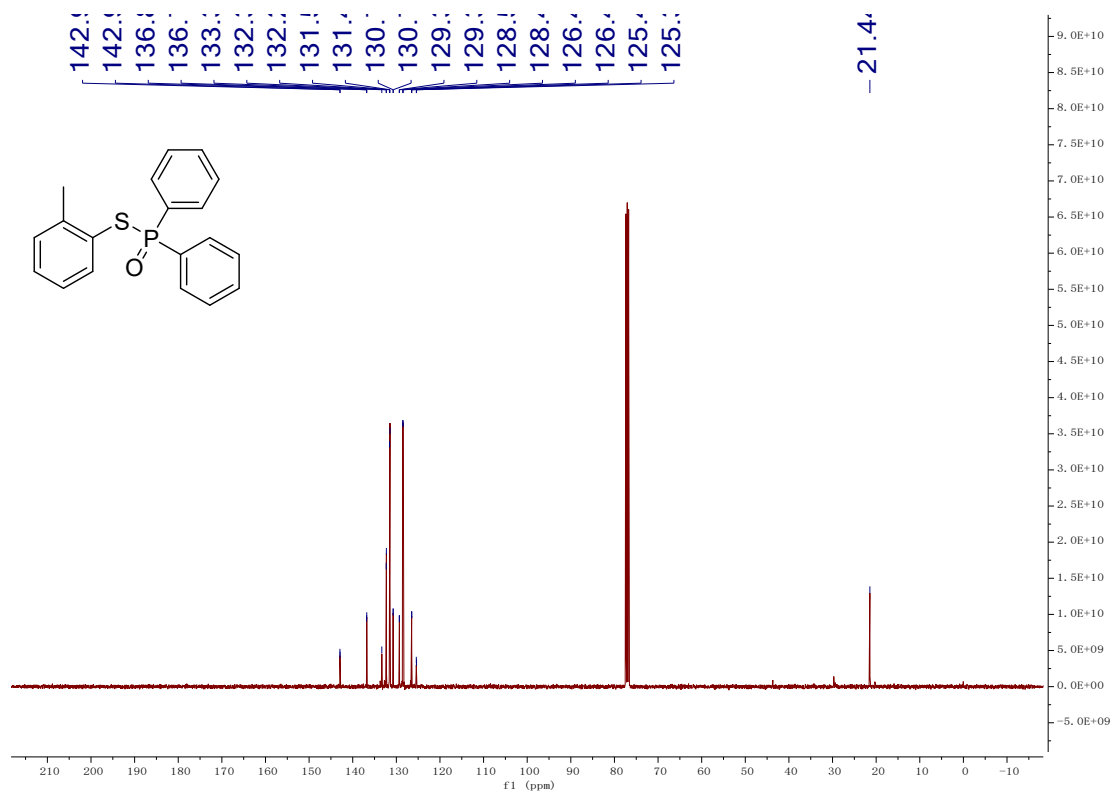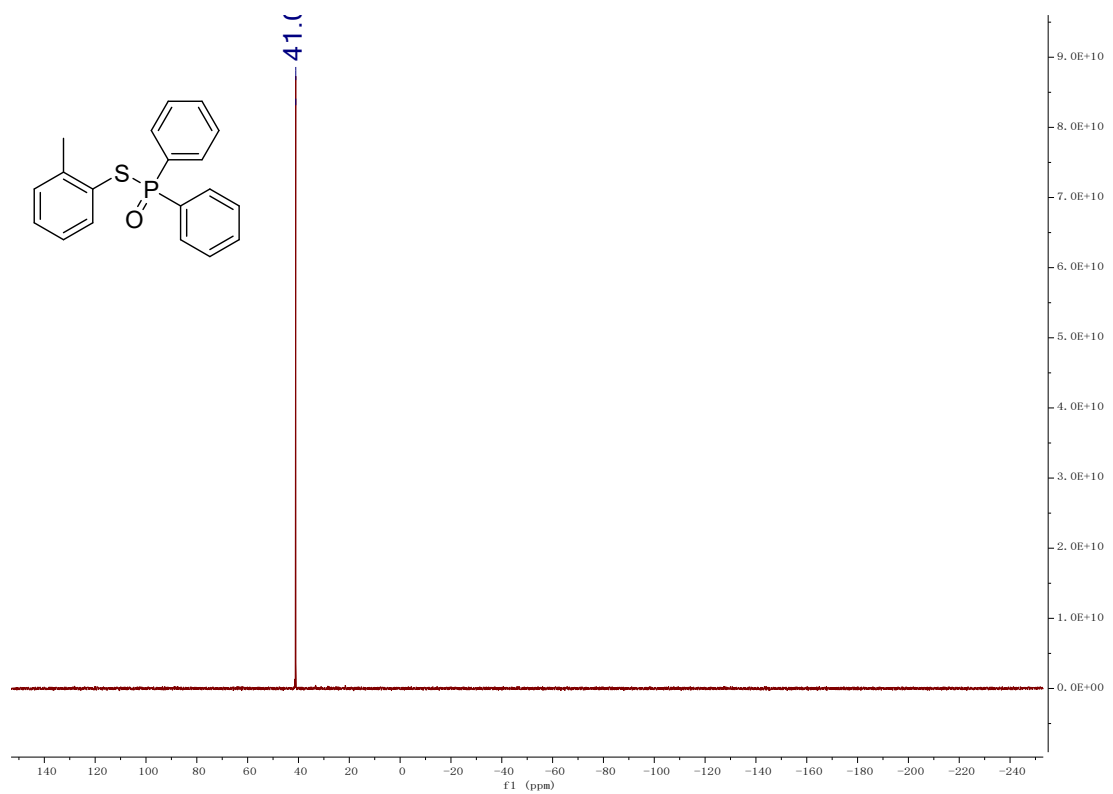

### S-(2-methoxyphenyl) diphenylphosphinothioate (3o)

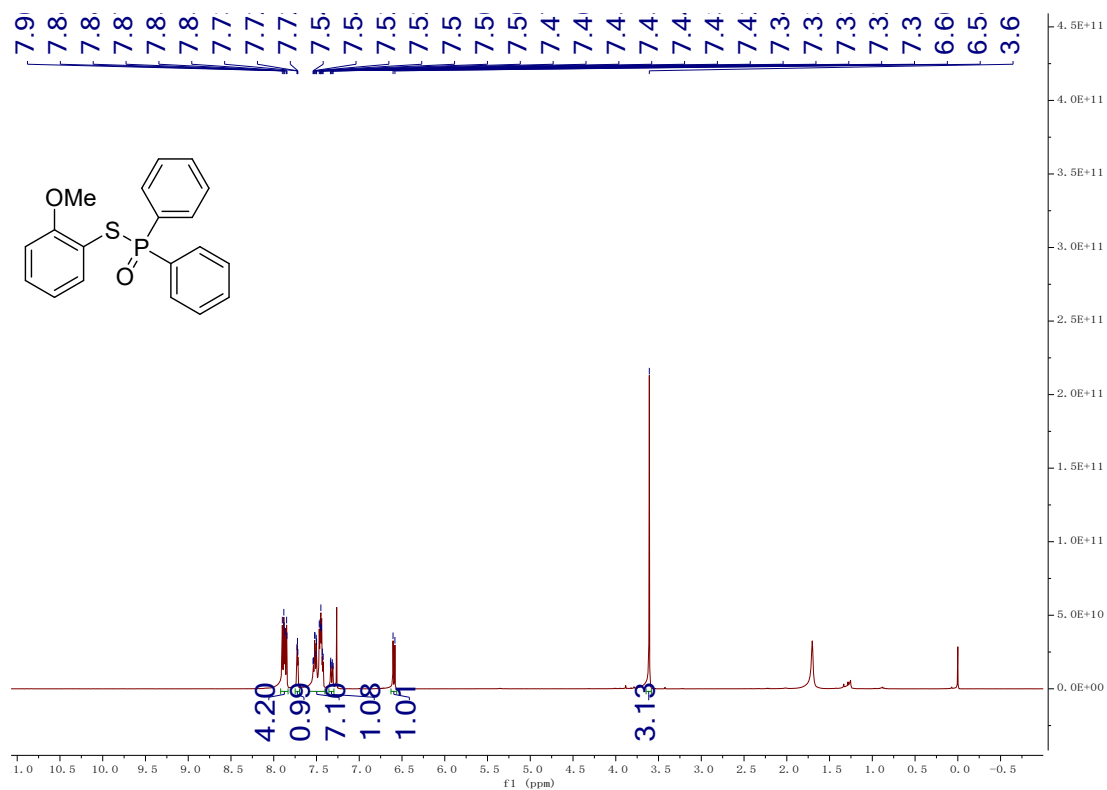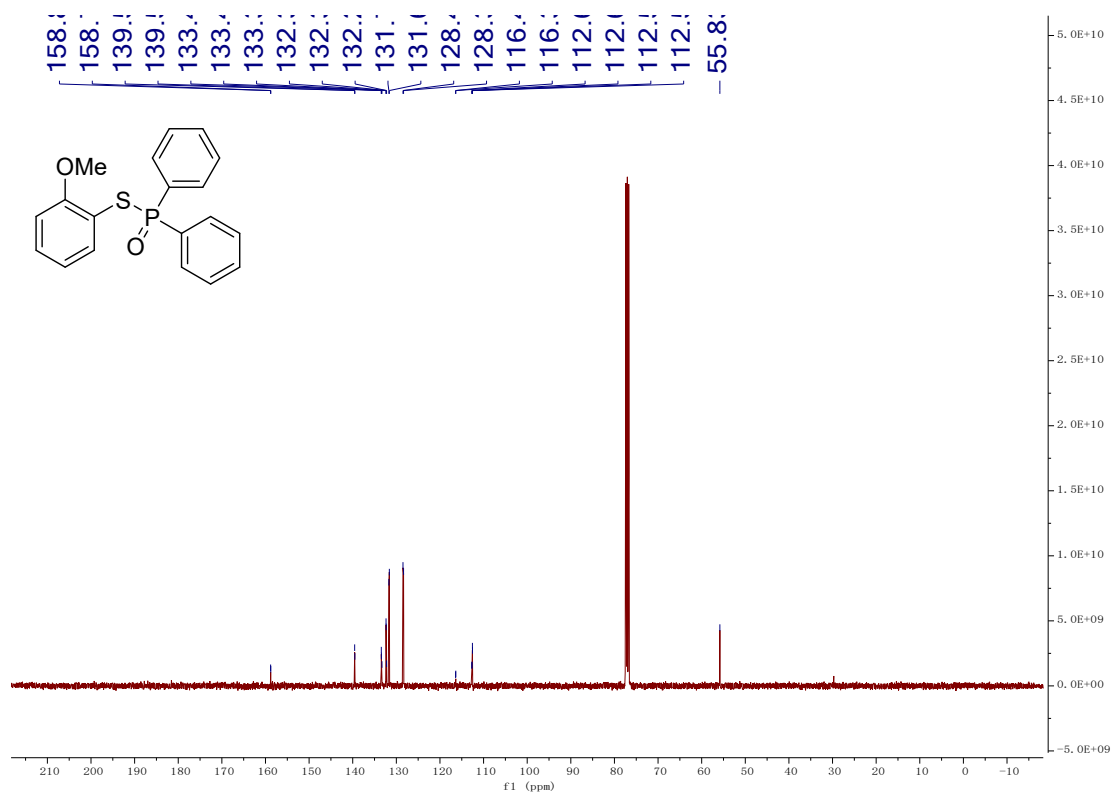



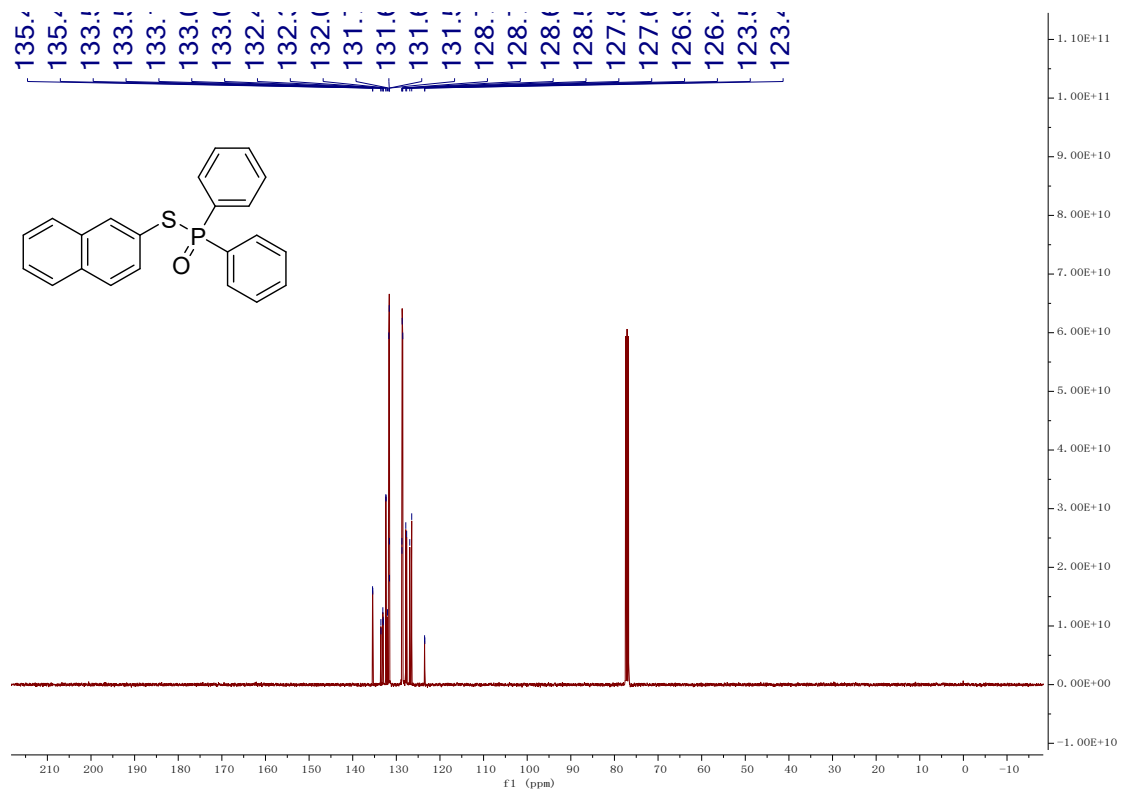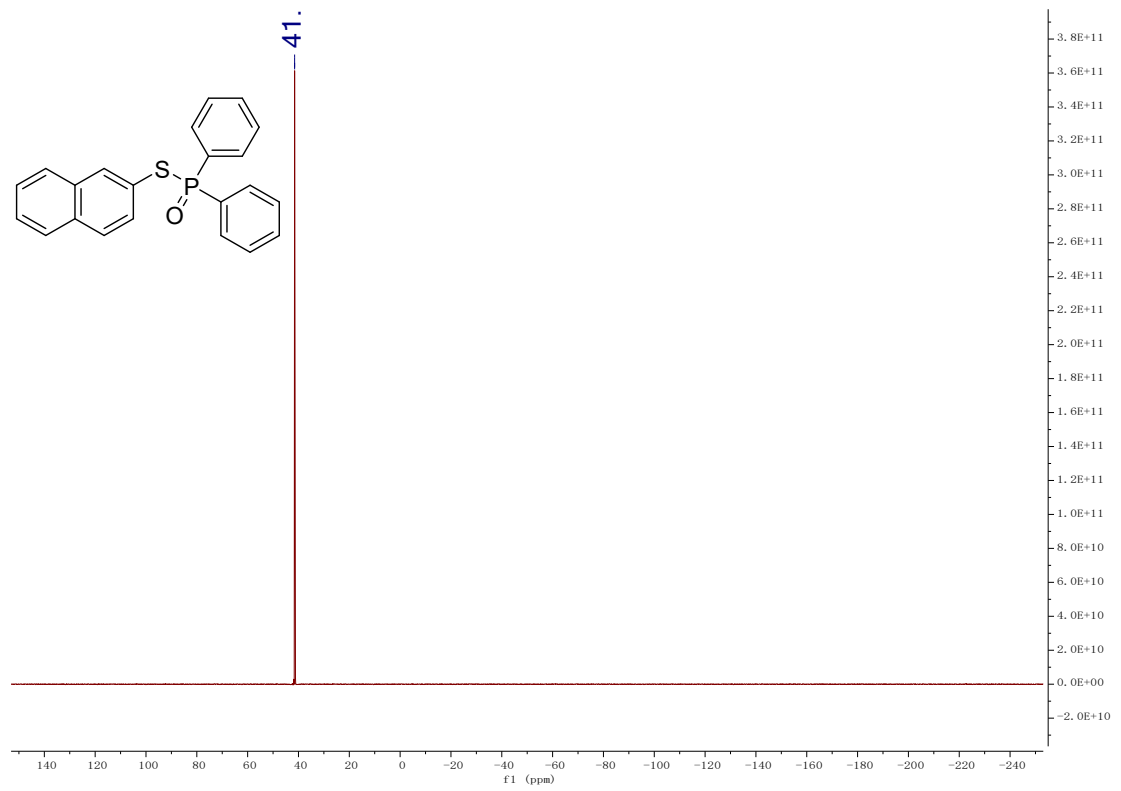

### S-phenyl di-p-tolylphosphinothioate (3r)

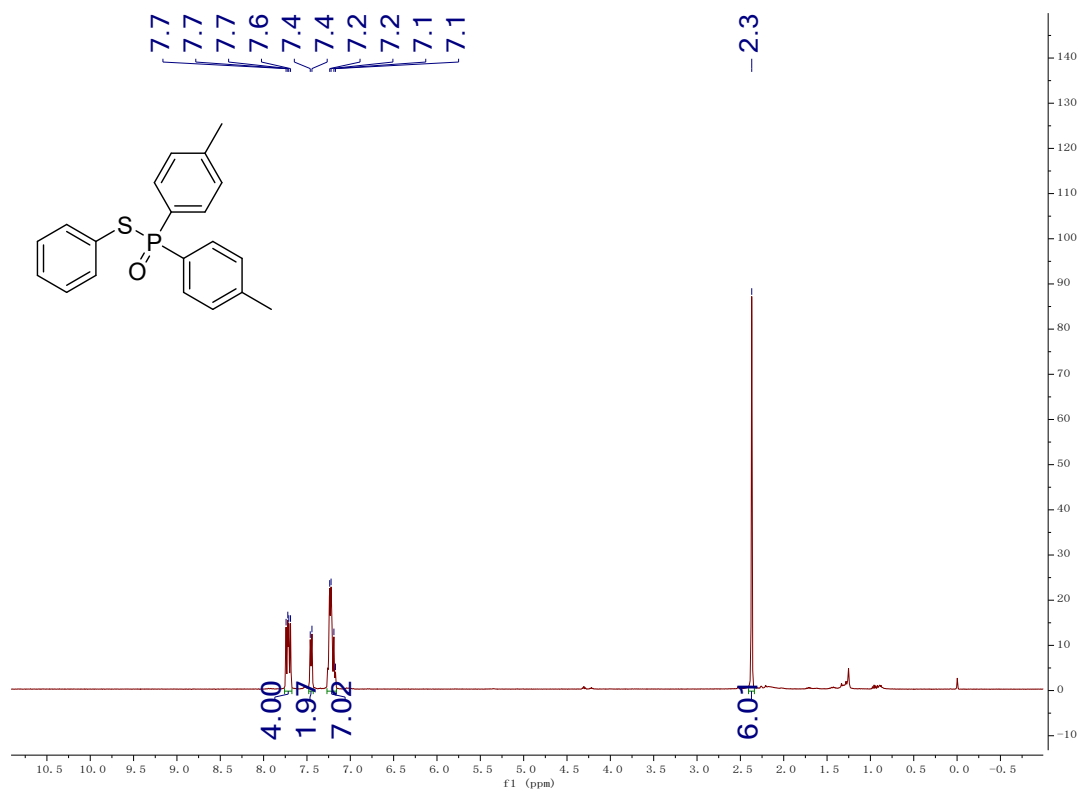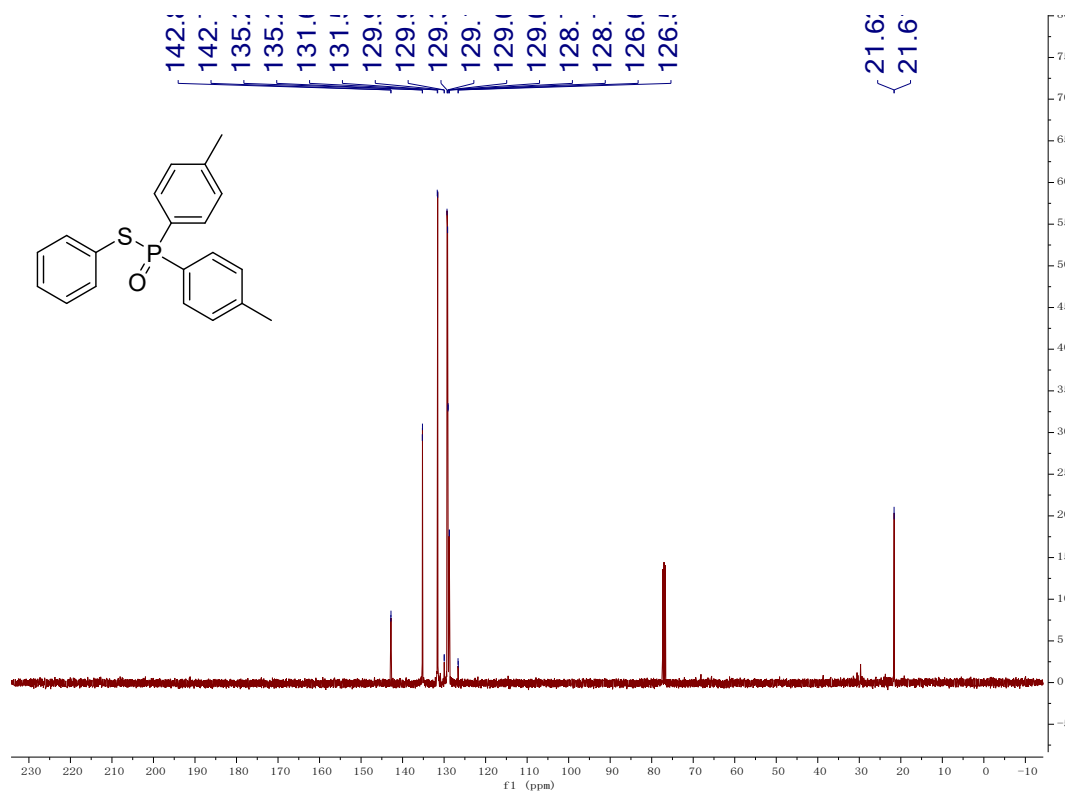

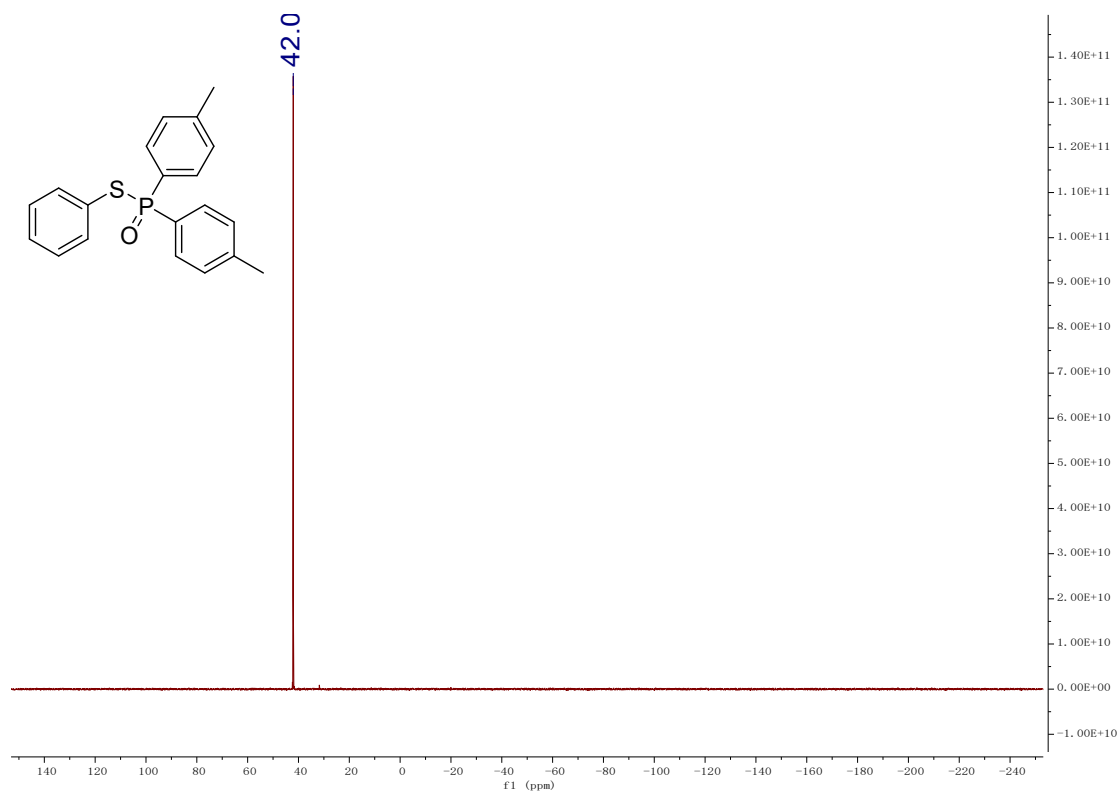

**S-phenyl bis(4-methoxyphenyl)phosphinothioate (3s)**

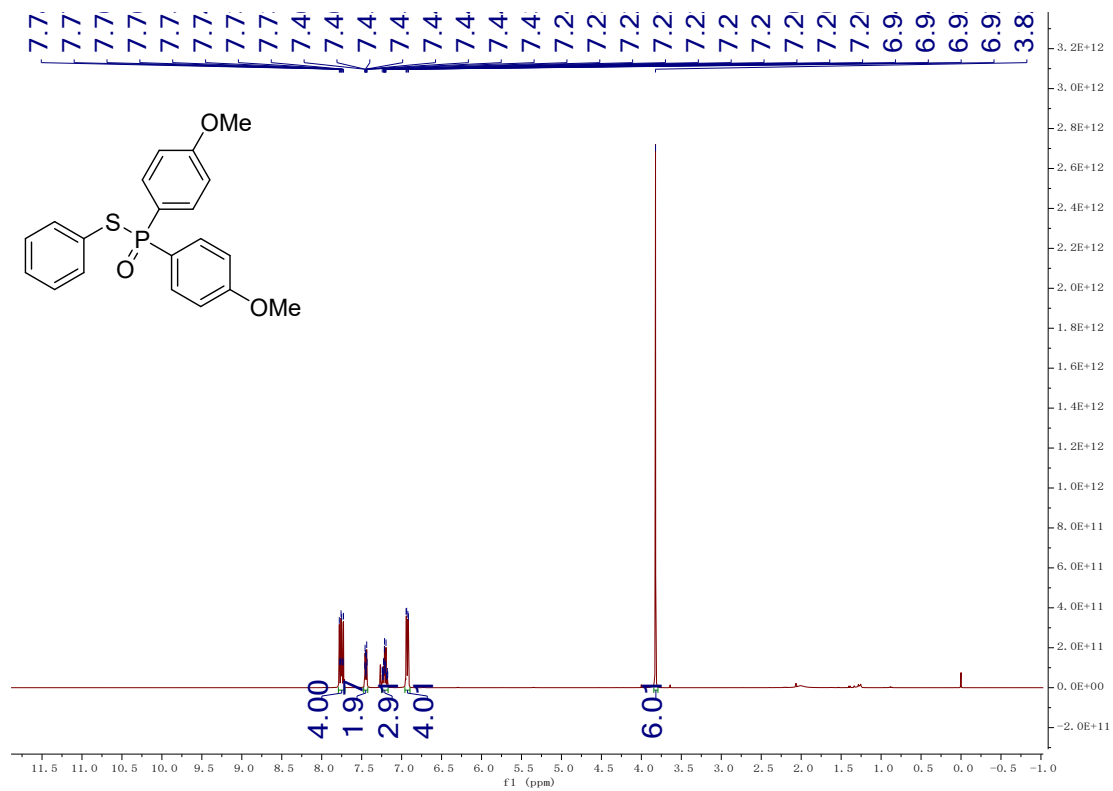



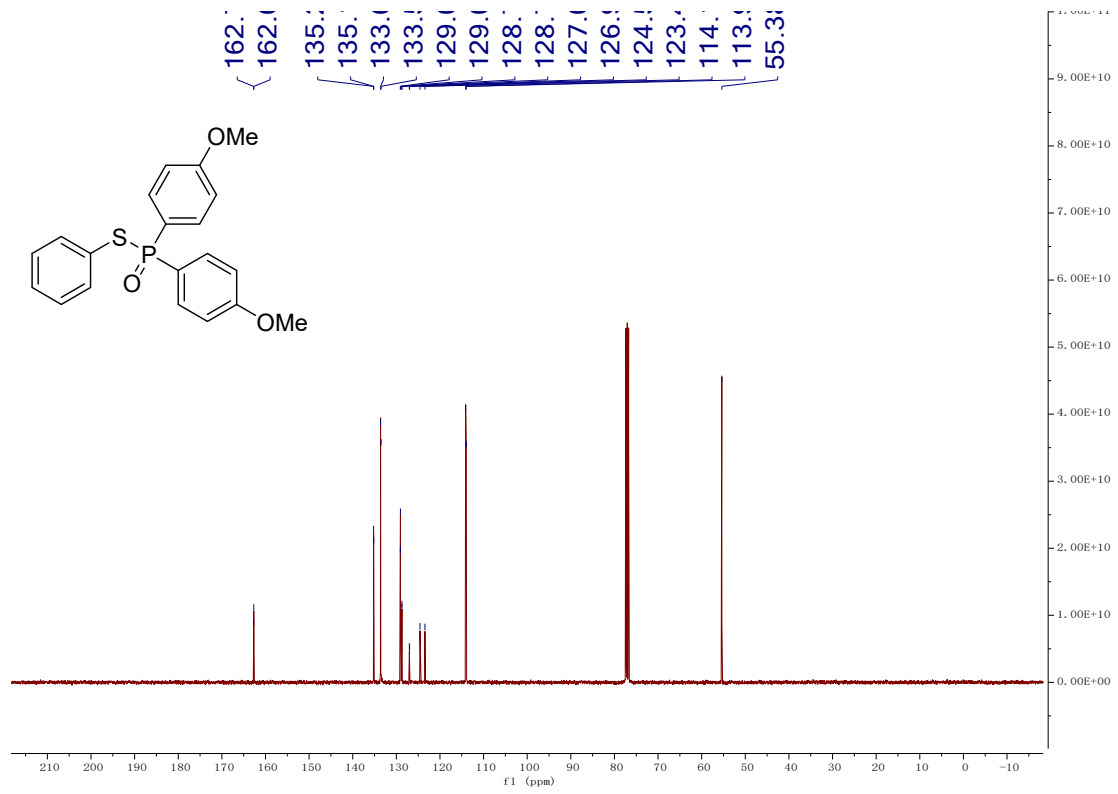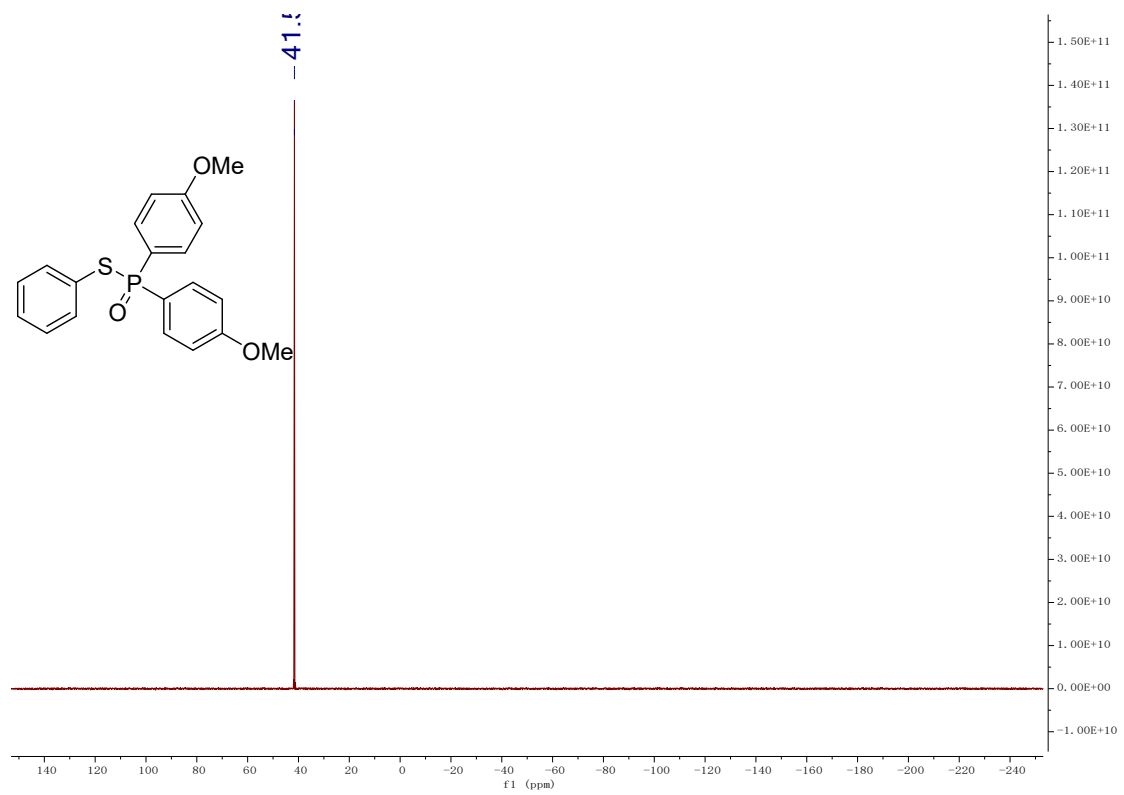

### S-phenyl bis(3,5-dimethylphenyl)phosphinothioate (3t)

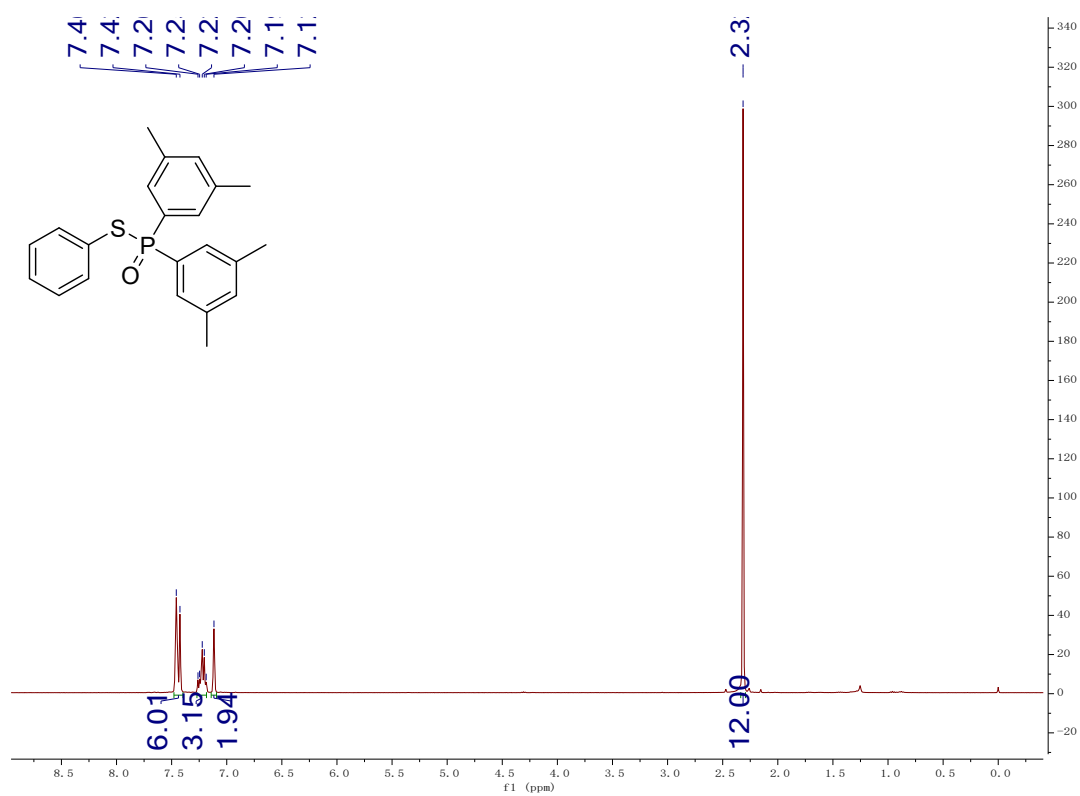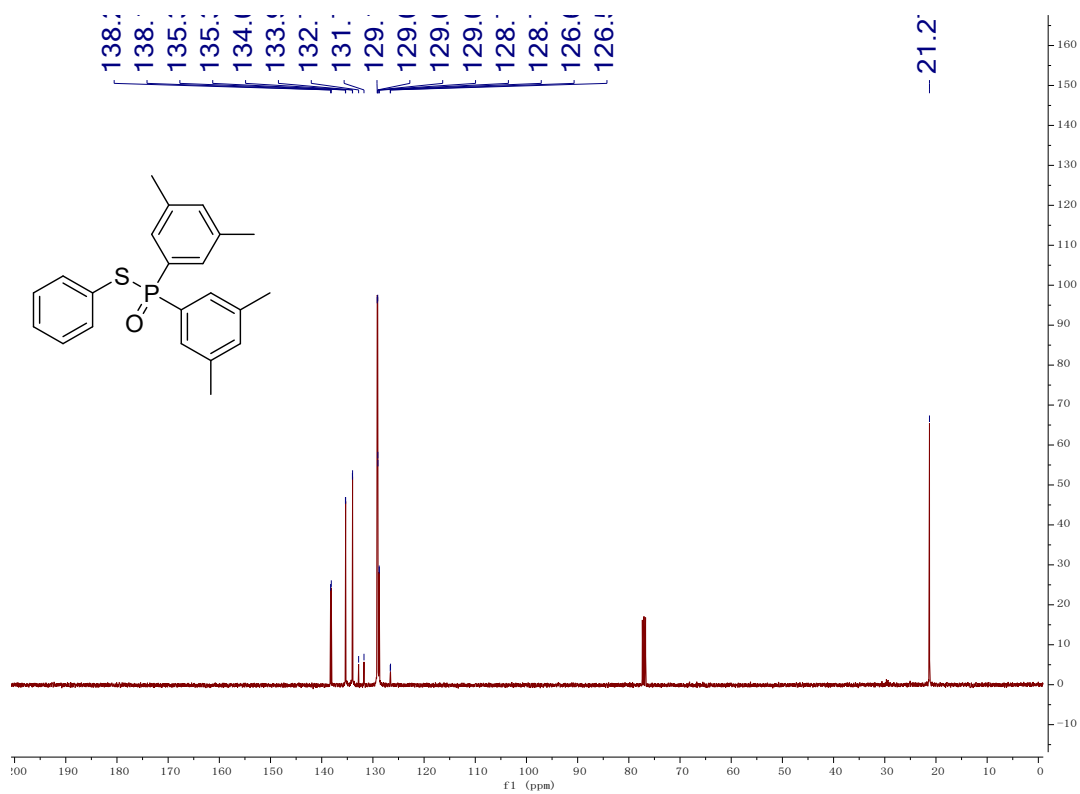

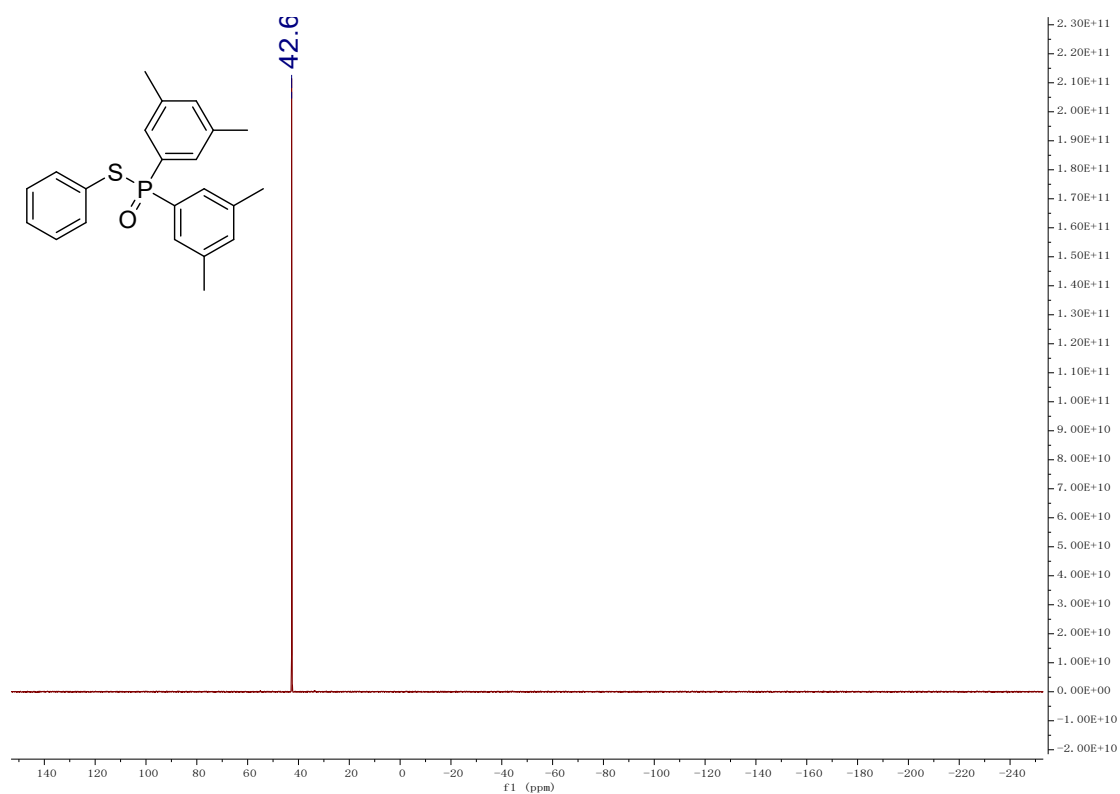

### S-phenyl di(naphthalen-2-yl)phosphinothioate (3u)

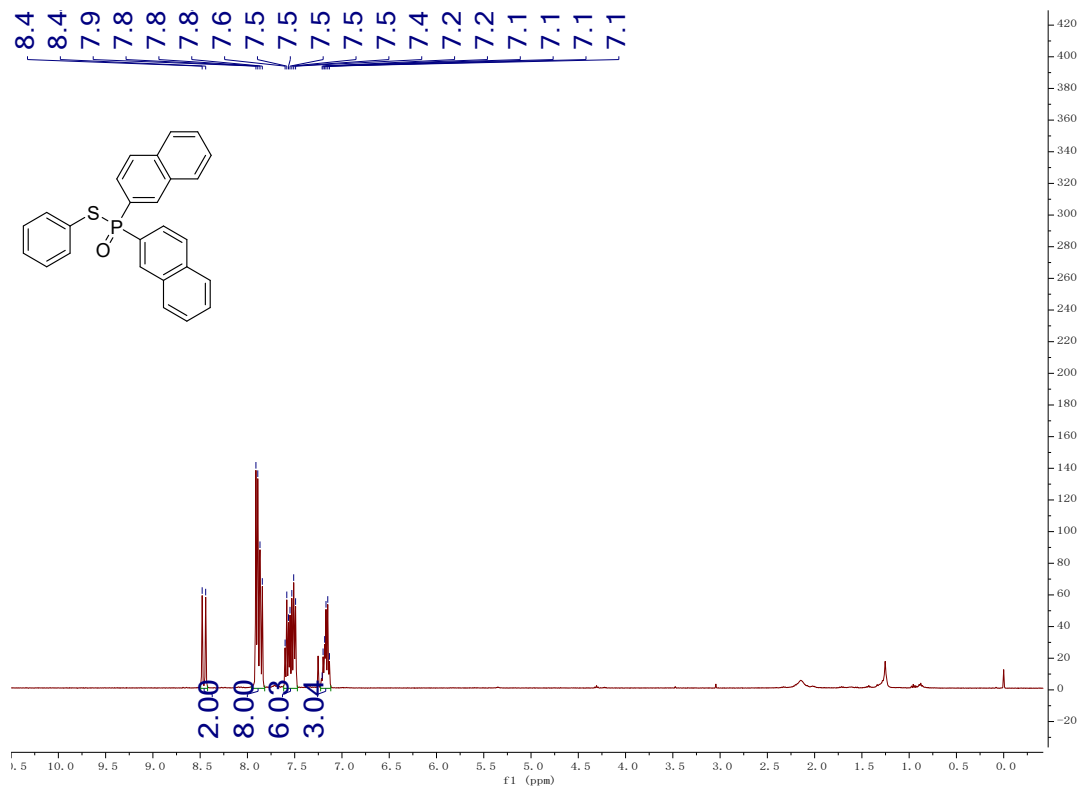

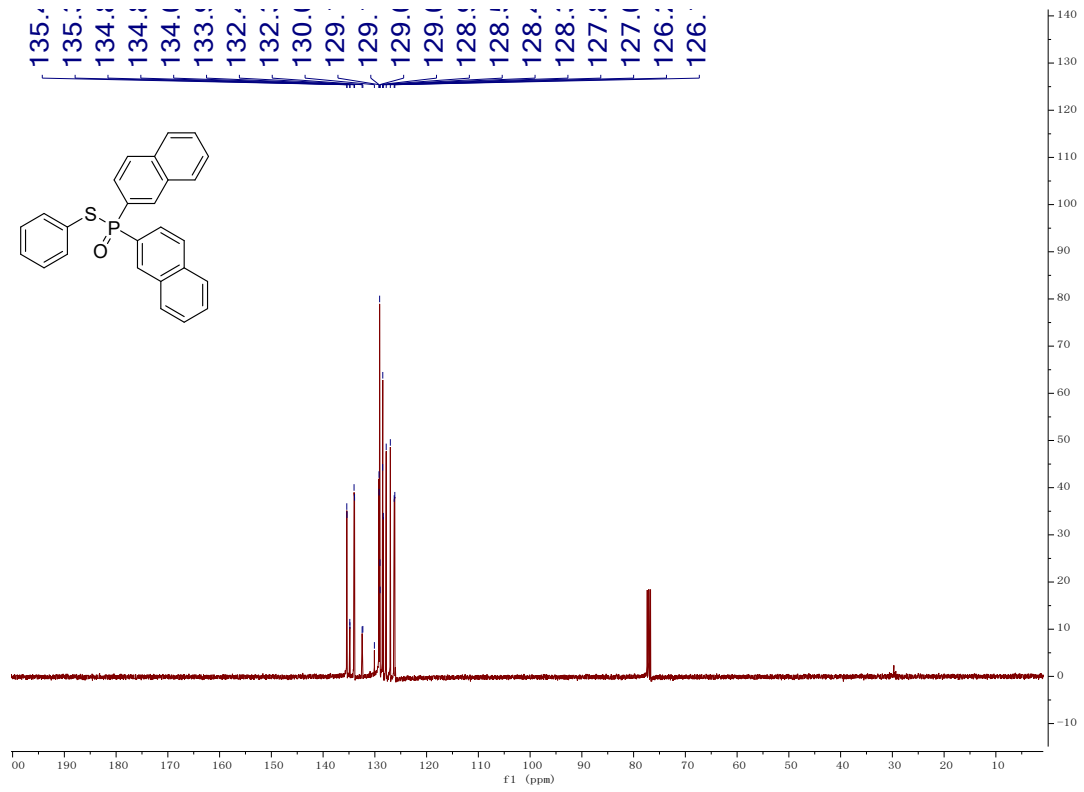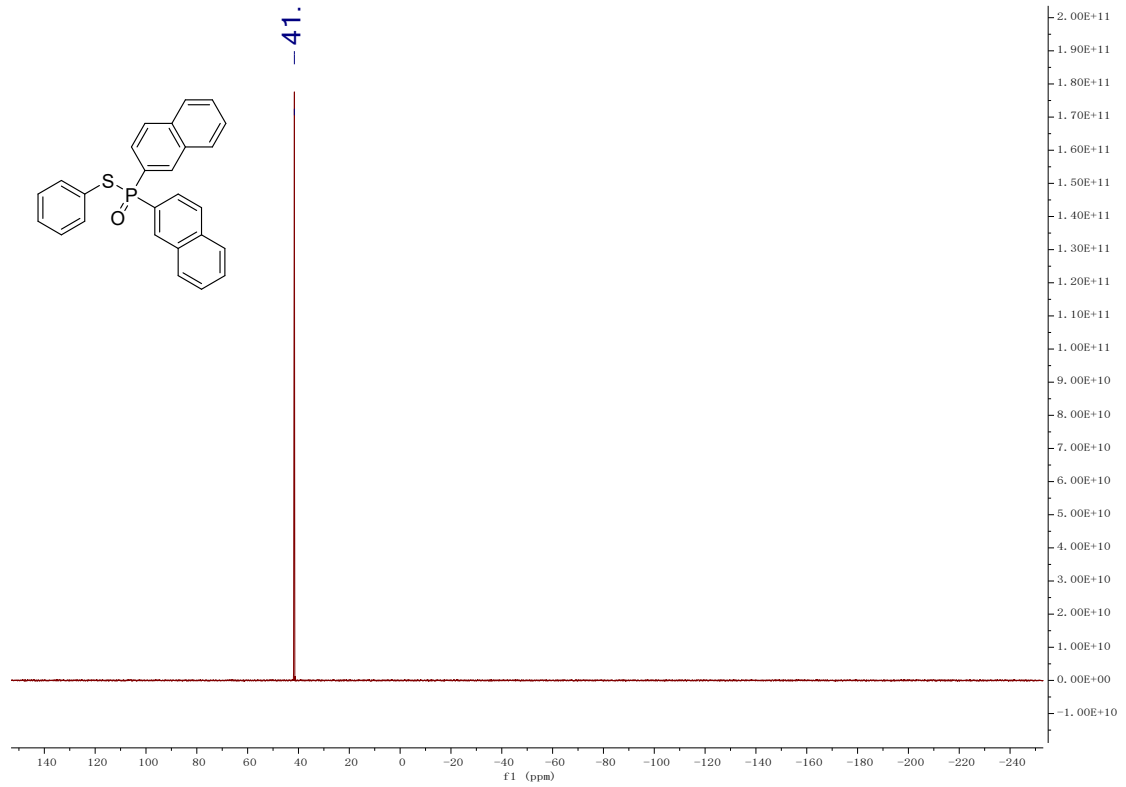

**methyl 4-((diphenylphosphoryl)thio)benzoate (3w)**

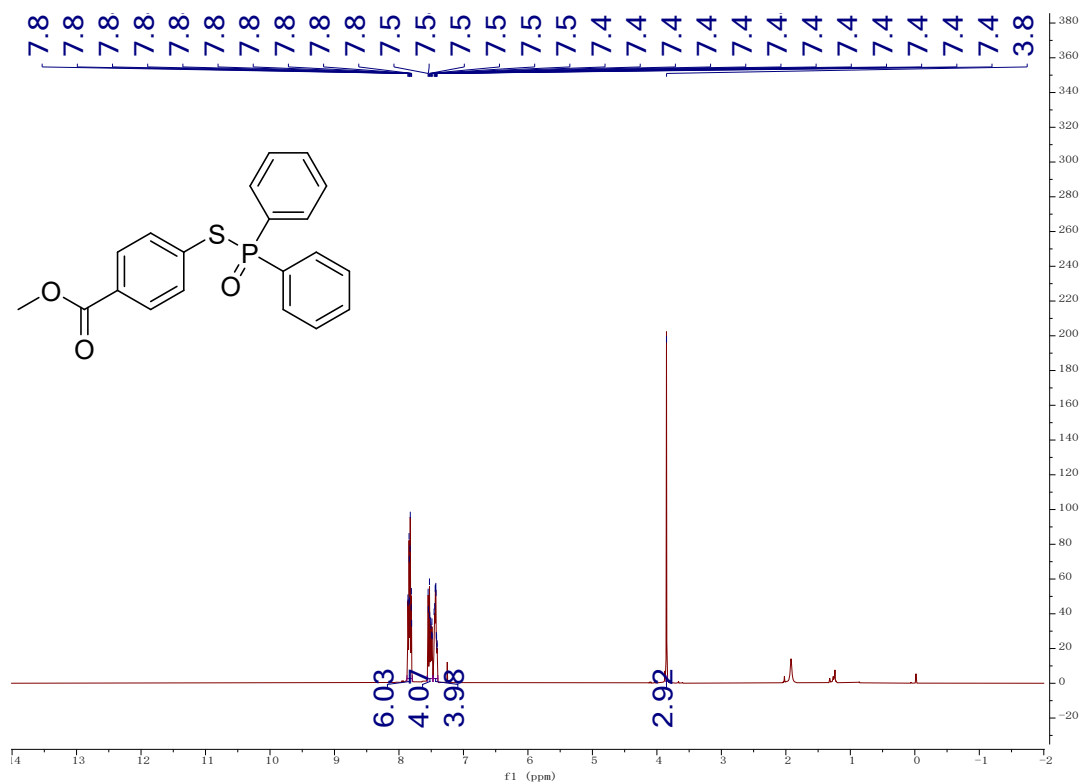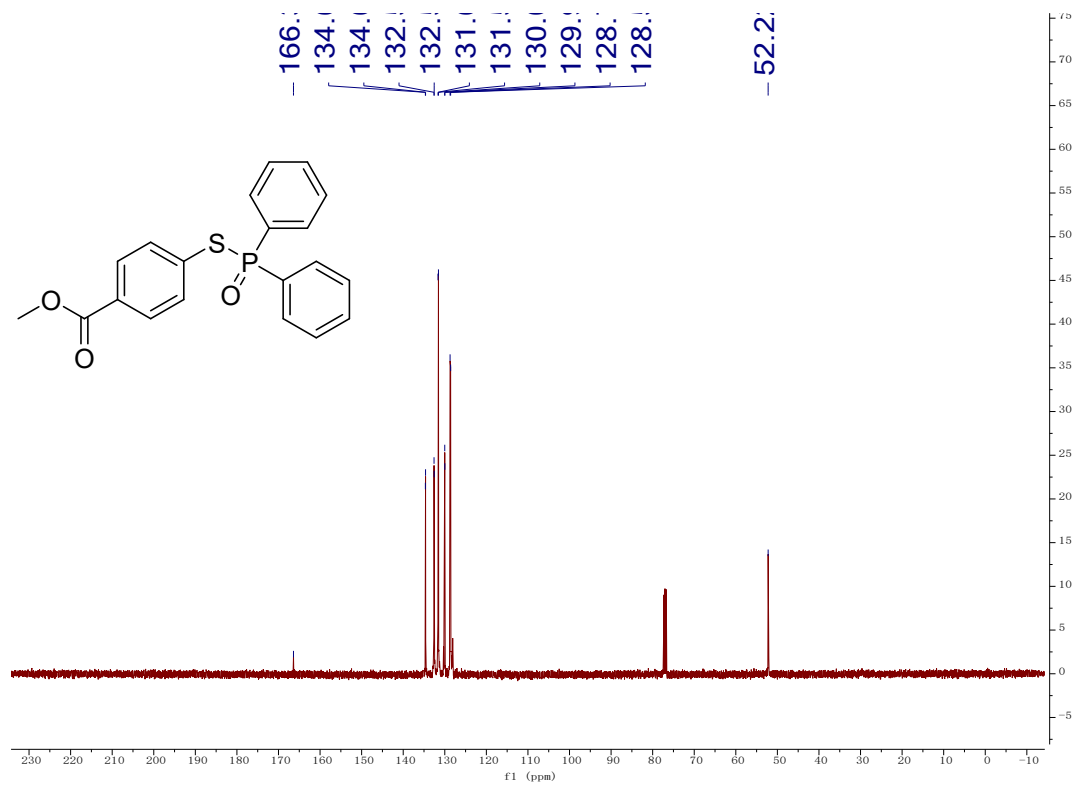

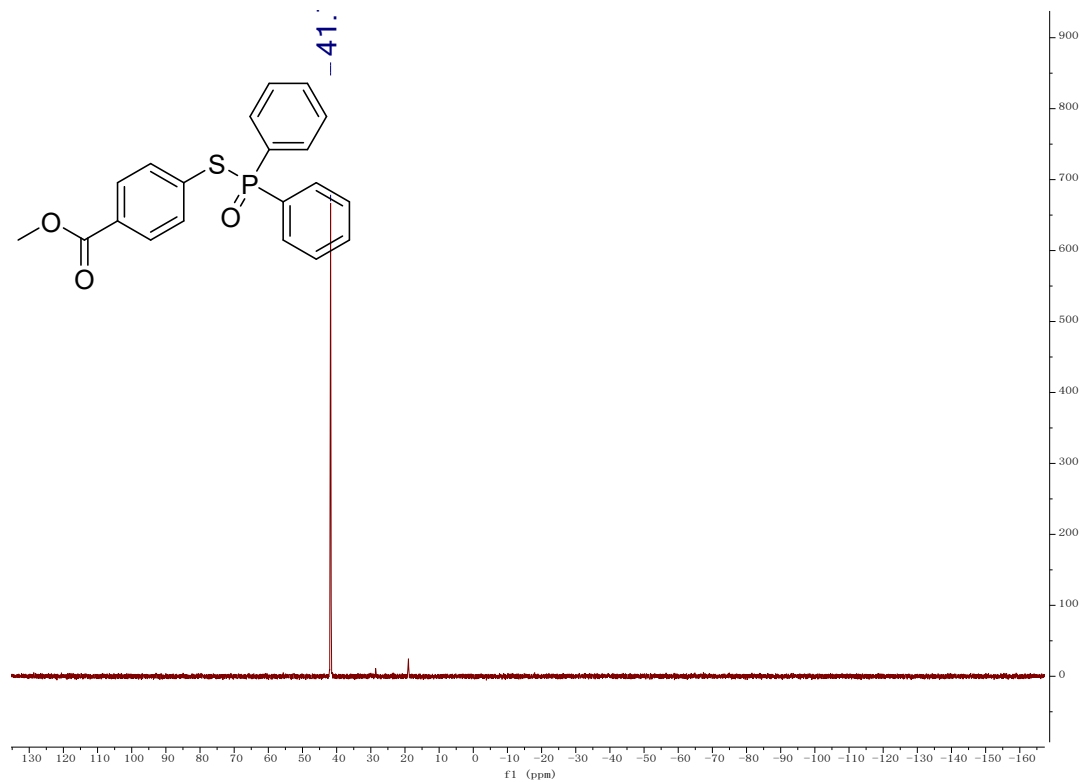

## $^1\text{H}$ NMR track experiments ( $\text{CD}_3\text{CN}$ )

### $^1\text{H}$ NMR of 1a

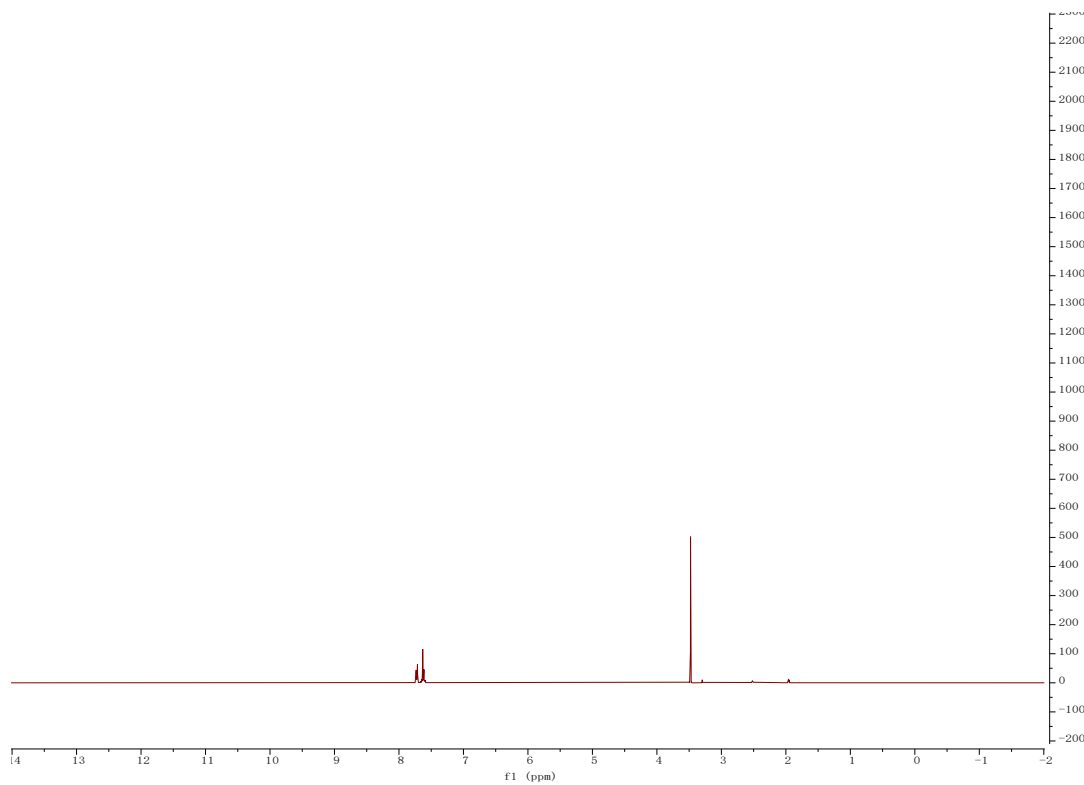

### <sup>1</sup>H NMR of 2a

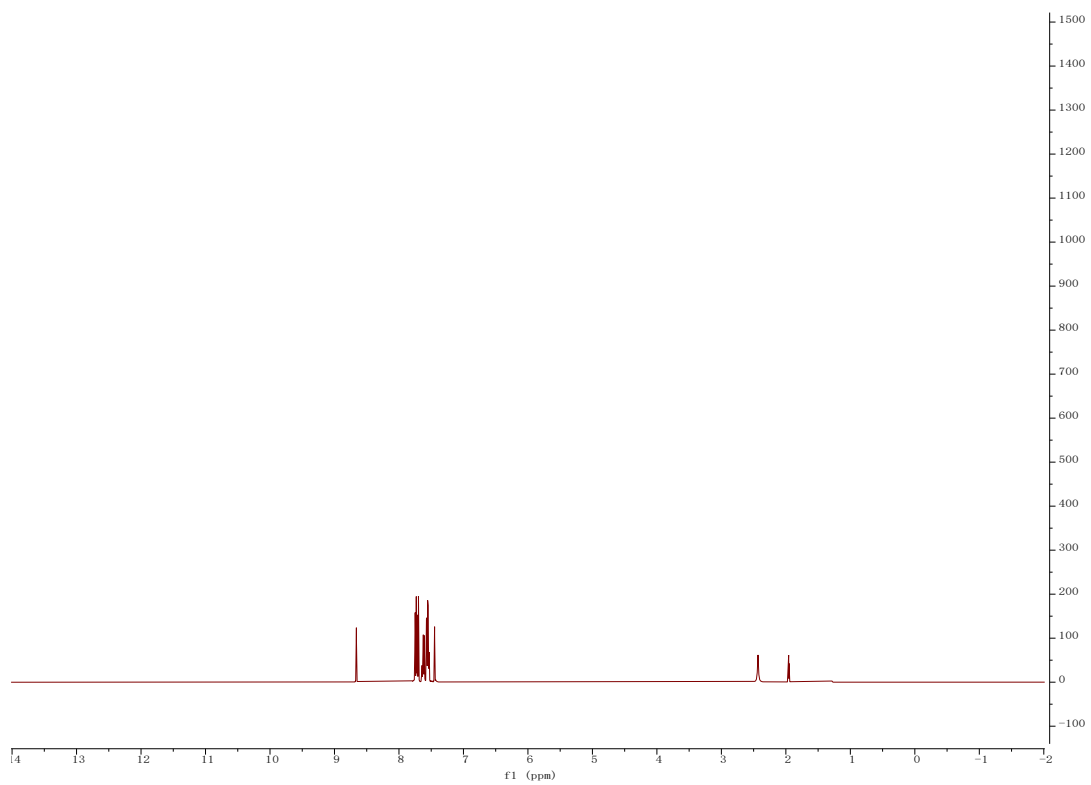

### <sup>1</sup>H NMR of 1a+2a 10min

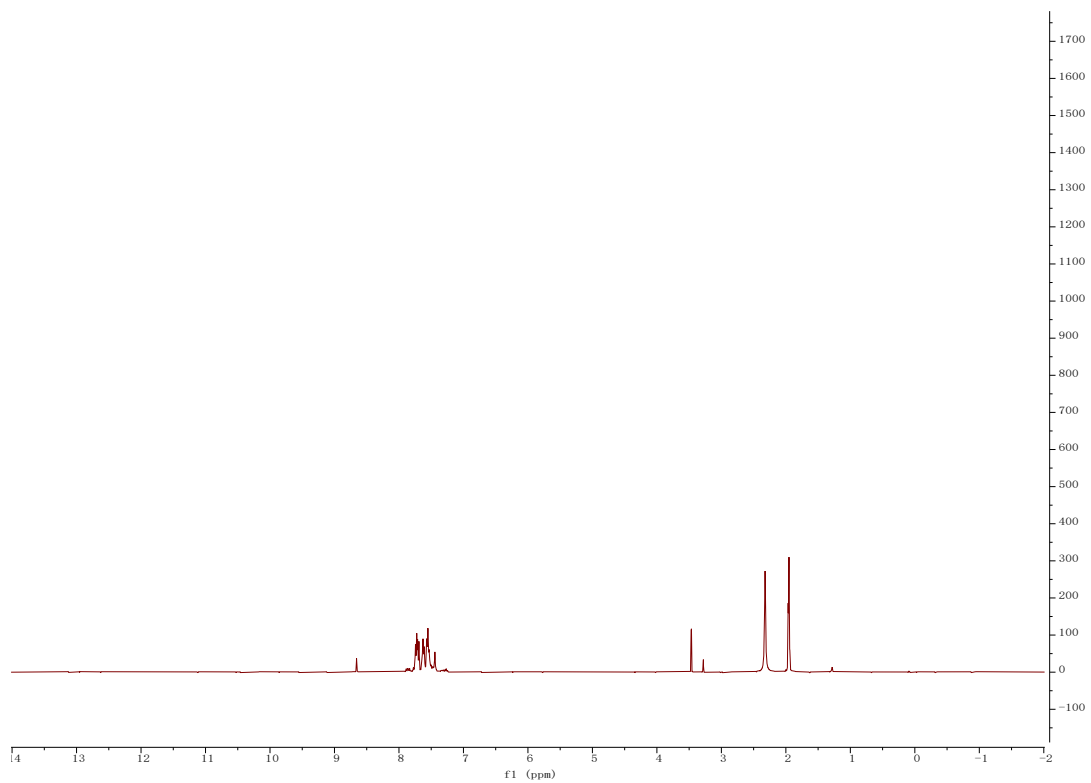

**<sup>1</sup>H NMR of 1a+2a 20min**

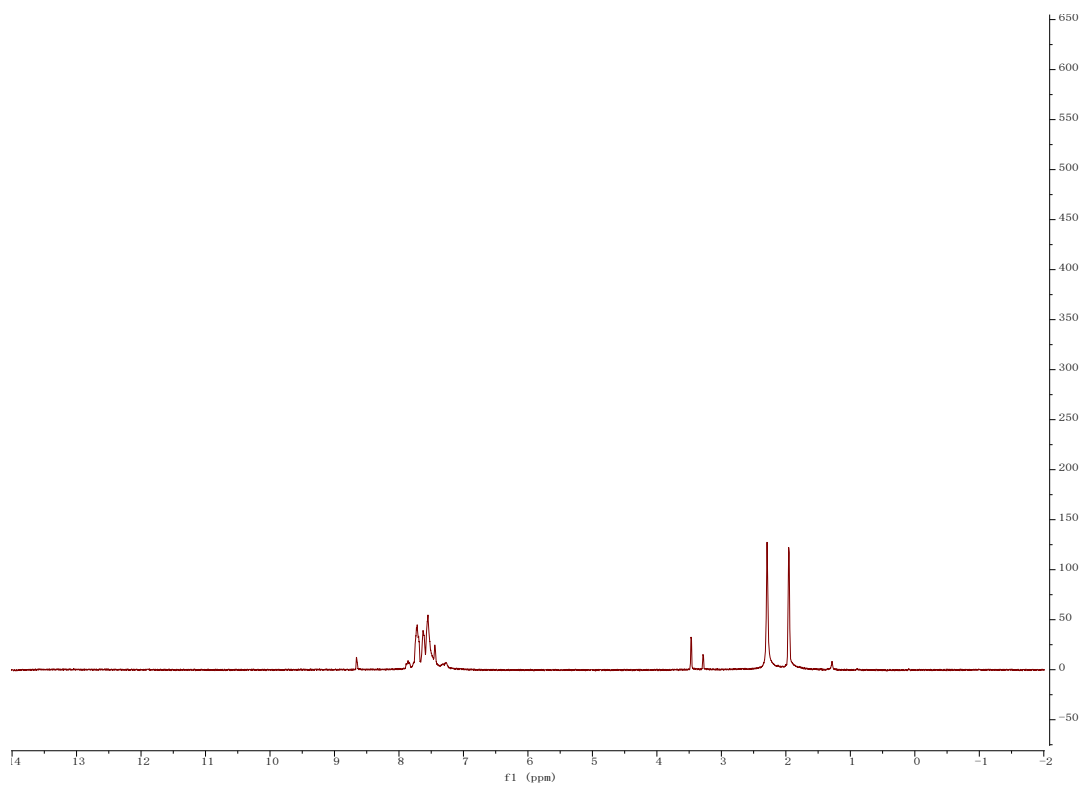

**<sup>1</sup>H NMR of 1a+2a 30 min**

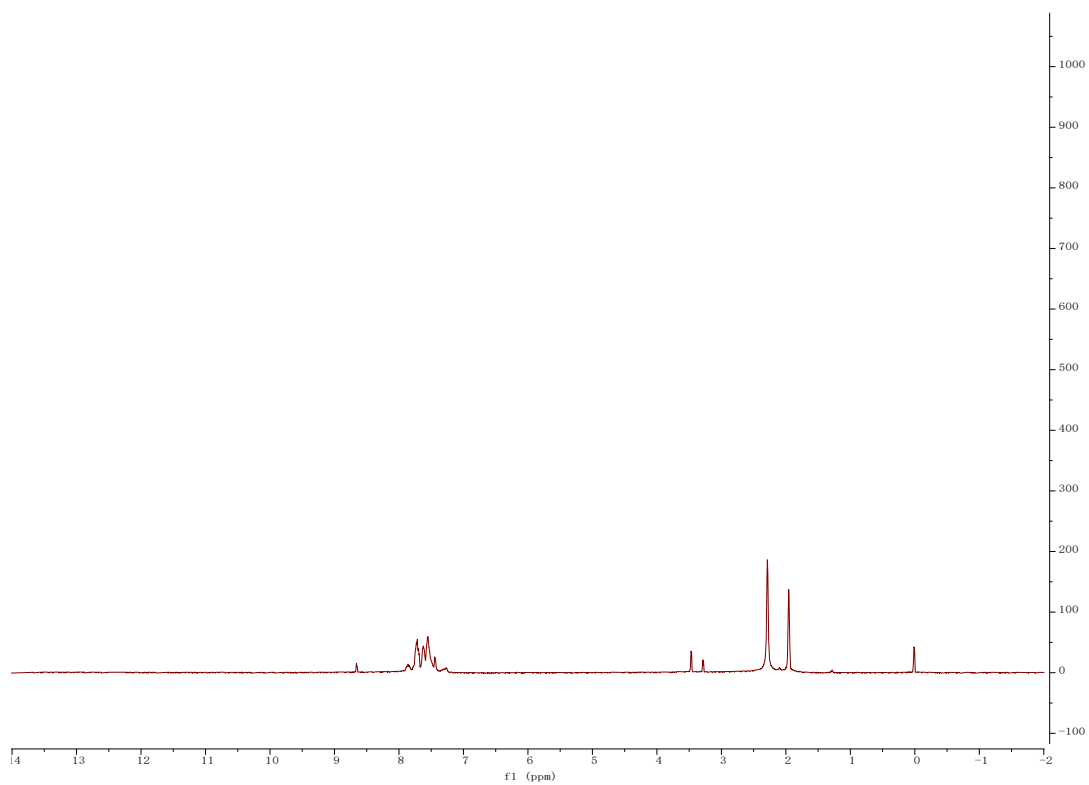



# <sup>1</sup>H NMR of 1a+2a 40 min

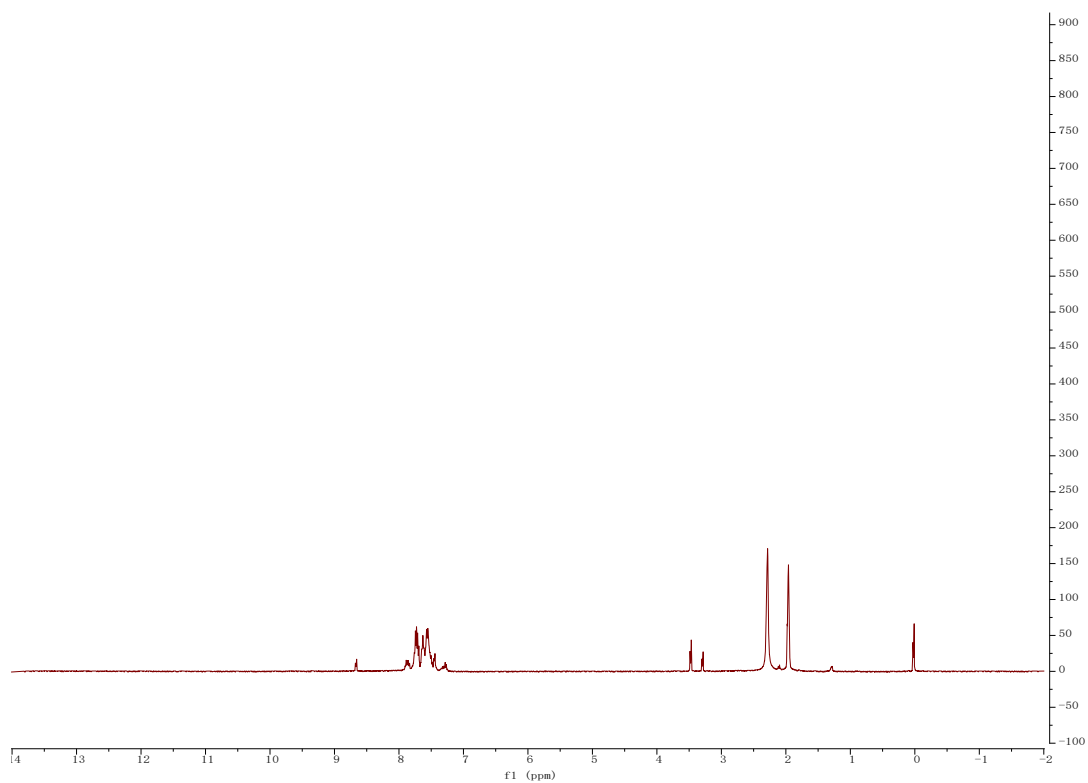

## <sup>1</sup>H NMR

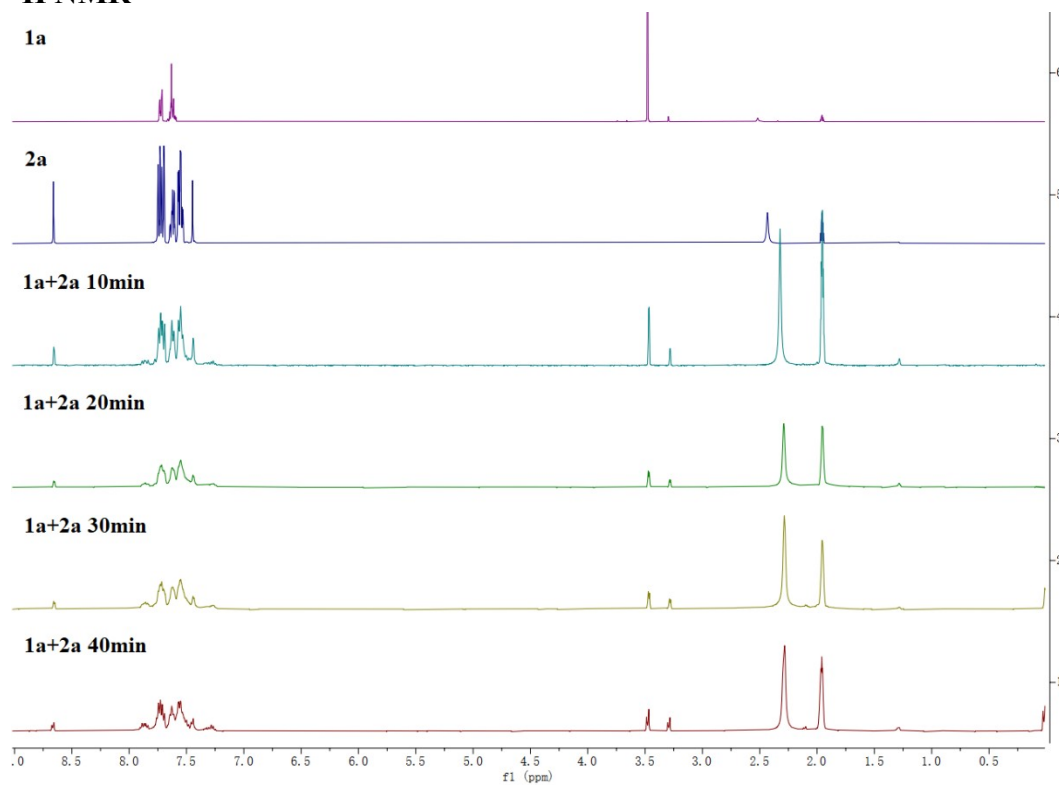

## $^1\text{H}$ NMR (3.0-3.75 ppm)

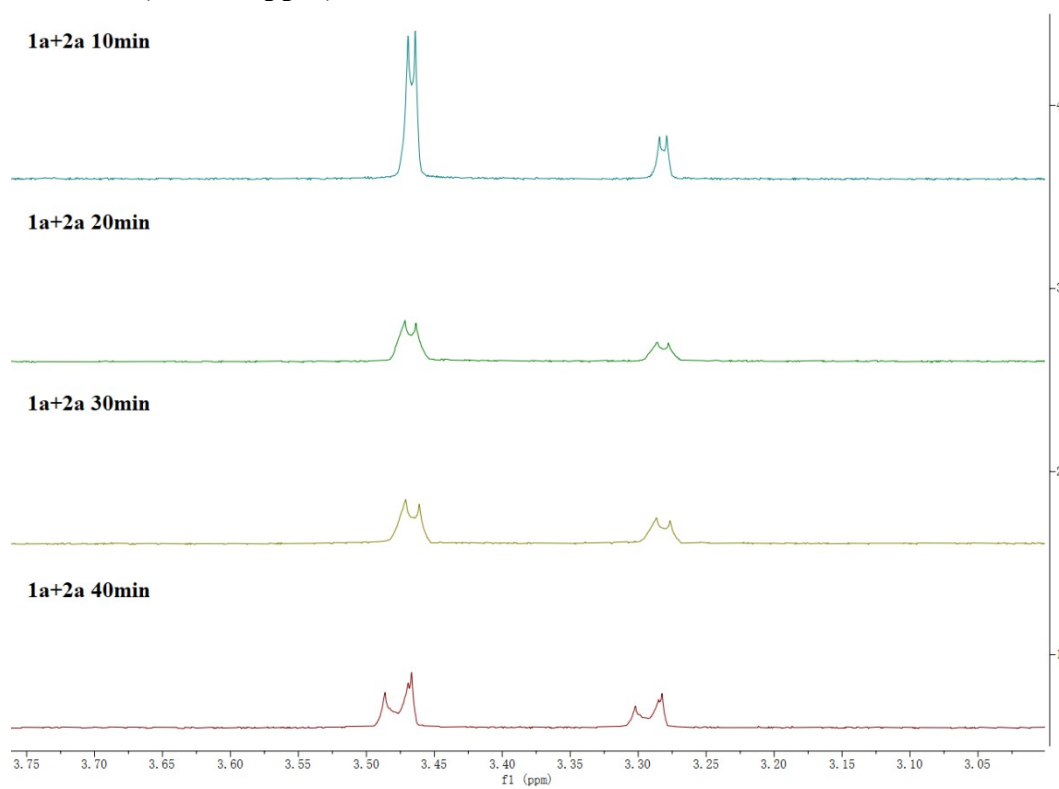

## 5. Crystal data

### Crystal data of 3a

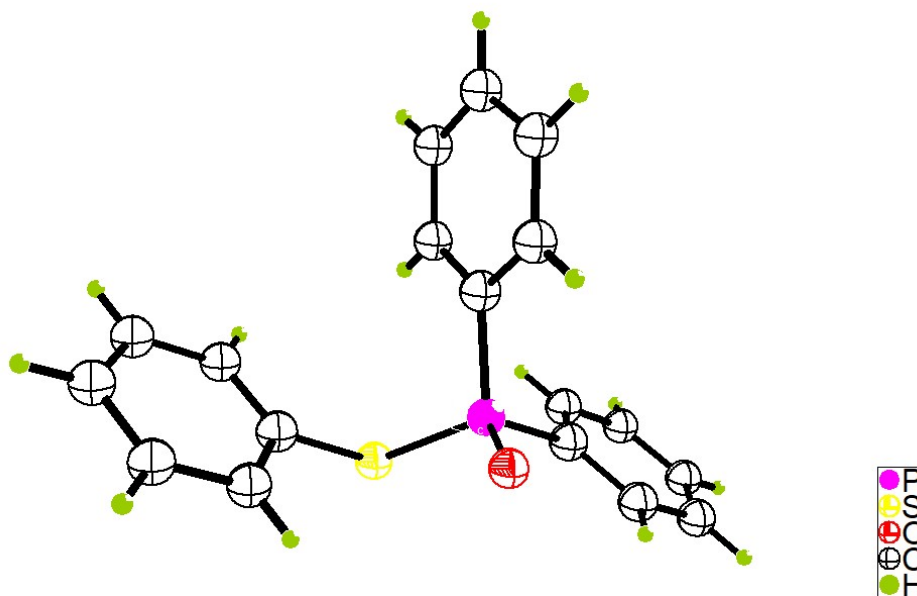

Table 1 Crystal data and structure refinement for 3a.

|                                             |                                                               |
|---------------------------------------------|---------------------------------------------------------------|
| Identification code                         | 3aa                                                           |
| Empirical formula                           | C <sub>18</sub> H <sub>15</sub> OPS                           |
| Formula weight                              | 310.33                                                        |
| Temperature/K                               | 296.15                                                        |
| Crystal system                              | triclinic                                                     |
| Space group                                 | P-1                                                           |
| a/Å                                         | 6.190(2)                                                      |
| b/Å                                         | 8.426(3)                                                      |
| c/Å                                         | 16.517(5)                                                     |
| α/°                                         | 100.248(5)                                                    |
| β/°                                         | 96.034(5)                                                     |
| γ/°                                         | 108.478(5)                                                    |
| Volume/Å <sup>3</sup>                       | 791.9(4)                                                      |
| Z                                           | 2                                                             |
| ρ <sub>calc</sub> /cm <sup>3</sup>          | 1.302                                                         |
| μ/mm <sup>-1</sup>                          | 0.301                                                         |
| F(000)                                      | 324.0                                                         |
| Crystal size/mm <sup>3</sup>                | ? × ? × ?                                                     |
| Radiation                                   | MoKα (λ = 0.71073)                                            |
| 2θ range for data collection/°              | 5.09 to 54.926                                                |
| Index ranges                                | -6 ≤ h ≤ 7, -10 ≤ k ≤ 10, -15 ≤ l ≤ 21                        |
| Reflections collected                       | 4768                                                          |
| Independent reflections                     | 3428 [R <sub>int</sub> = 0.0181, R <sub>sigma</sub> = 0.0341] |
| Data/restraints/parameters                  | 3428/0/190                                                    |
| Goodness-of-fit on F <sup>2</sup>           | 1.017                                                         |
| Final R indexes [I ≥ 2σ (I)]                | R <sub>1</sub> = 0.0429, wR <sub>2</sub> = 0.1047             |
| Final R indexes [all data]                  | R <sub>1</sub> = 0.0581, wR <sub>2</sub> = 0.1128             |
| Largest diff. peak/hole / e Å <sup>-3</sup> | 0.24/-0.33                                                    |

CCDC-number: 2184647

### Crystal data of Diphenylphosphinic acid

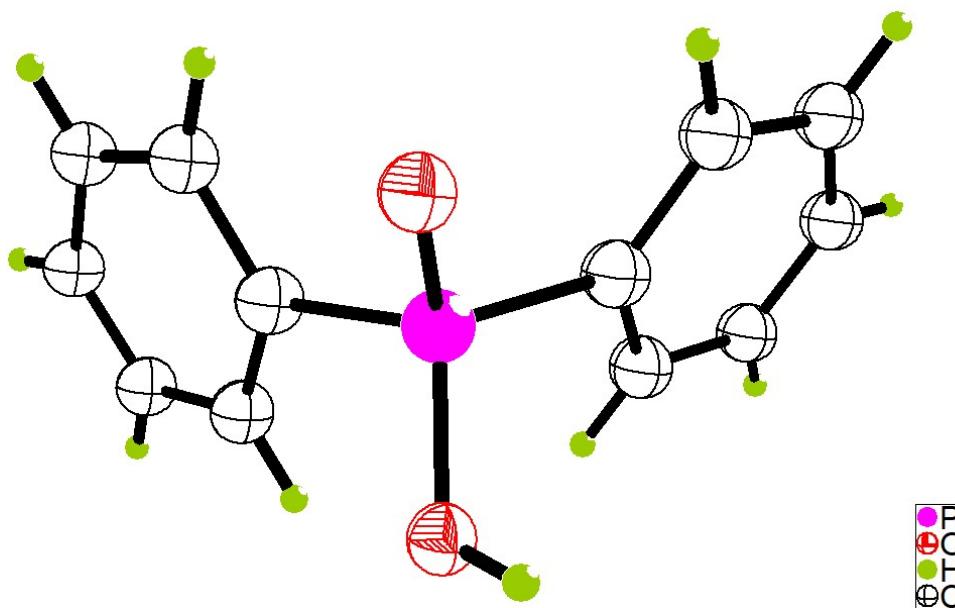

**Table 2 Crystal data and structure refinement for Diphenylphosphinic acid.**

|                                        |                                                          |
|----------------------------------------|----------------------------------------------------------|
| Identification code                    | Diphenylphosphinic acid                                  |
| Empirical formula                      | C <sub>12</sub> H <sub>11</sub> O <sub>2</sub> P         |
| Formula weight                         | 218.18                                                   |
| Temperature/K                          | 296.15                                                   |
| Crystal system                         | monoclinic                                               |
| Space group                            | P2 <sub>1</sub> /c                                       |
| a/Å                                    | 11.482(3)                                                |
| b/Å                                    | 6.0814(17)                                               |
| c/Å                                    | 15.777(5)                                                |
| $\alpha$ /°                            | 90                                                       |
| $\beta$ /°                             | 99.883(5)                                                |
| $\gamma$ /°                            | 90                                                       |
| Volume/Å <sup>3</sup>                  | 1085.3(5)                                                |
| Z                                      | 4                                                        |
| $\rho_{\text{calc}}/\text{cm}^3$       | 1.335                                                    |
| $\mu/\text{mm}^{-1}$                   | 0.228                                                    |
| F(000)                                 | 456.0                                                    |
| Crystal size/mm <sup>3</sup>           | ? × ? × ?                                                |
| Radiation                              | MoK $\alpha$ ( $\lambda$ = 0.71073)                      |
| 2 $\theta$ range for data collection/° | 3.6 to 55.272                                            |
| Index ranges                           | -14 ≤ h ≤ 14, 0 ≤ k ≤ 7, 0 ≤ l ≤ 20                      |
| Reflections collected                  | 2459                                                     |
| Independent reflections                | 2459 [R <sub>int</sub> = ?, R <sub>sigma</sub> = 0.0349] |
| Data/restraints/parameters             | 2459/0/138                                               |
| Goodness-of-fit on F <sup>2</sup>      | 1.083                                                    |

|                                                |                                  |
|------------------------------------------------|----------------------------------|
| Final R indexes [ $I \geq 2\sigma(I)$ ]        | $R_1 = 0.0705$ , $wR_2 = 0.2407$ |
| Final R indexes [all data]                     | $R_1 = 0.0841$ , $wR_2 = 0.2568$ |
| Largest diff. peak/hole / $e \text{ \AA}^{-3}$ | 0.72/-0.35                       |

CCDC-number: 2184646
